# Supplementary material for: Formation and reactivity of a unique M⋯C–H interaction stabilized by carborane cages
Source: Royal Society of Chemistry journal article supplement (doi:10.1039/d4sc01158a), 2024-01-01
Supplement: d4sc01158a1.pdf [file d4sc01158a1.pdf]

# **Formation and Reactivity of a Unique M...C-H Interaction Stabilized by Carborane Cages**

Xin-Ran Liu<sup>†a</sup>, Peng-Fei Cui<sup>†a</sup>, Yago García-Rodeja<sup>b</sup>, Miquel Solà<sup>b</sup>, and Guo-Xin Jin<sup>\*a</sup>

a. State Key Laboratory of Molecular Engineering of Polymers, Shanghai Key Laboratory of Molecular Catalysis and Innovative Materials, Department of Chemistry, Fudan University, 2005 Songhu Road, Shanghai, 200433 (P. R. China).

b. Institut de Química Computacional i Catàlisi and Departament de Química, Universitat de Girona, C/Maria Aurèlia Capmany, 69, 17003 Girona, Spain.

Corresponding author: Guo-Xin Jin E-mail: [gxjin@fudan.edu.cn](mailto:gxjin@fudan.edu.cn)

## Table of Contents

|                                                                          |    |
|--------------------------------------------------------------------------|----|
| S1. Materials and Methods Experimental Procedures                        | 3  |
| S2. Synthesis and Characterization                                       | 4  |
| S2.1 Synthesis and Characterization of complex <b>1</b>                  | 4  |
| S2.2 Synthesis and Characterization of complex <b>2</b>                  | 9  |
| S2.3 Synthesis and Characterization of Ligand <b>3</b>                   | 14 |
| S2.4 Synthesis and Characterization of Ligand <b>4</b>                   | 18 |
| S2.5 Synthesis and Characterization of complex <b>3a</b>                 | 22 |
| S2.6 Synthesis and Characterization of complex <b>3b</b>                 | 28 |
| S2.7 Synthesis and Characterization of complex <b>4</b>                  | 33 |
| S2.8 Synthesis and Characterization of complex <b>5a</b>                 | 37 |
| S2.9 Synthesis and Characterization of complex <b>5b</b>                 | 41 |
| S2.10 Synthesis and Characterization of complex <b>6</b>                 | 44 |
| S3. Density functional theory (DFT) calculations                         | 49 |
| S4. Crystallographic Information                                         | 52 |
| S5. Cartesian coordinates and Gibbs energies of all the computed systems | 62 |
| S6. References                                                           | 75 |

## S1. Materials and Methods Experimental Procedures

### Materials

All reagents and solvents were purchased from commercial sources (Sigma Aldrich, Chem-extension, Leyan and Energy Chemical) and used as supplied unless otherwise mentioned. The starting material  $[\text{Cp}^*\text{IrCl}_2]_2$ <sup>[1]</sup> and  $[\text{Cp}^*\text{RhCl}_2]_2$ <sup>[1]</sup> were prepared by literature method.

### Methods

NMR spectra were recorded on Bruker AVANCE I 400 Spectrometers. Spectra were recorded at room temperature and referenced to the residual protonated solvent for NMR spectra. Proton chemical shifts ( $\delta$  H = 7.26 ( $\text{CDCl}_3$ )); ( $\delta$  C = 77.16 ( $\text{CDCl}_3$ )); ( $\delta$  H = 3.31 ( $\text{CD}_3\text{OD}$ )) and ( $\delta$  C = 49.00 ( $\text{CD}_3\text{OD}$ )) are reported relative to the solvent residual peak. Coupling constants are expressed in hertz.

Infrared (IR) spectra of solid samples (KBr tablets) were measured using a Nicolet AVATAR-360IR spectrometer in the wavelength range of 400–4000  $\text{cm}^{-1}$ .

UV–vis absorbance of samples was measured using an Agilent Cary 100 UV spectrophotometer with 0.1 mM solutions in dichloromethane.

ESI-MS of samples were measured using a Water G2-xs time-of-flight mass spectrometer using ESI.

Single crystals of **L3**, **L4**, complex **3a**, complex **3b**, complex **4**, complex **5a**, complex **5b** and complex **6** suitable for X-ray diffraction study were obtained at suitable temperature. X-ray intensity data of **L3** and complex **6** were collected on a Bruker D8 Venture system ( $\text{Cu}_{\text{K}\alpha}$ ,  $\lambda = 1.54178 \text{ \AA}$ ). X-ray intensity data of the others were collected on a CCD-Bruker SMART APEX system ( $\text{Ga}_{\text{K}\alpha}$ ,  $\lambda = 1.34138 \text{ \AA}$ ).

CCDC number: 2303640 (**L3**); 2303643 (**L4**); 2303637 (complex **3a**); 2303636 (complex **3b**); 2303641 (complex **4**); 2303638 (complex **5a**); 2303644 (complex **5b**); 2303639 (complex **6**).

## S2. Synthesis and Characterization

### S2.1 Synthesis and Characterization of complex 1.

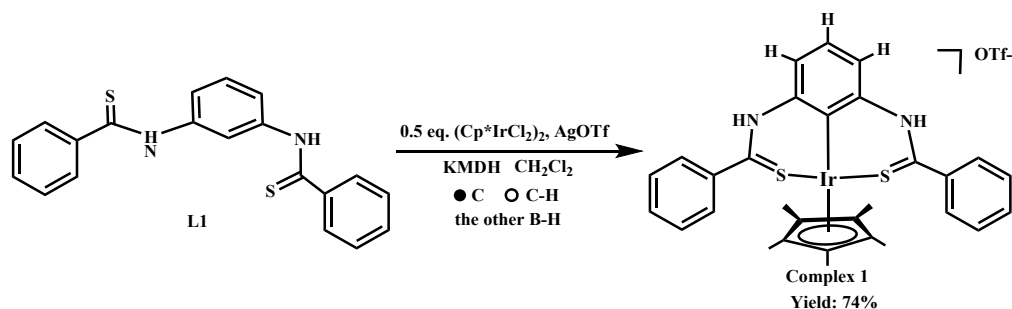

#### Scheme S1. Synthesis of complex 1.

Ligand 1 (34.85 mg, 0.10 mmol),  $[Cp^*IrCl_2]_2$  (40.40 mg, 0.05 mmol), AgOTf (51.20 mg, 0.20 mmol) and KMDH (0.05 mL) were added to the  $CH_2Cl_2$  solution (10 mL) at room temperature. The reaction mixture was stirred in the dark for 8 h. Then the mixture was filtrated and the filtrate was concentrated and further purified via silica gel column chromatography ( $CH_2Cl_2$  : MeOH, 30 : 1). Orange solids were obtained and dried under vacuo to give the complex 1: 60.98 mg 74%.  $^1H$  NMR (400 MHz;  $CDCl_3$ , 298K, ppm):  $\delta$  = 1.64 (s, 15H, Cp\*-H); 6.65 (t, 1H, Ar-H); 7.45 (d, 2H, Ar-H); 7.48 (t, 4H, Ar-H); 7.62 (t, 2H, Ar-H); 8.00 (d, 4H, Ar-H).  $^{13}C\{^1H\}$  NMR (101 MHz;  $CDCl_3$ , 298K, ppm):  $\delta$  = 8.17, 93.75 (Cp\*-C), 107.98, 119.20, 126.05, 128.95, 129.13, 133.74, 136.33, 143.40 (Ar-C); 190.19 (N-C=S). IR (KBr disk,  $cm^{-1}$ ):  $\nu$  = 3213.38, 3059.26, 2959.48, 2920.72, 1593.74, 1529.12, 1452.09, 1424.20, 1382.08, 1285.65, 1245.43, 1158.25, 1029.63, 916.53, 880.68, 691.69, 637.18, 516.68. ESI-MS:  $m/z$  = 675.1479 (calcd for  $[M - OTf]^+ = 675.1456$ ).

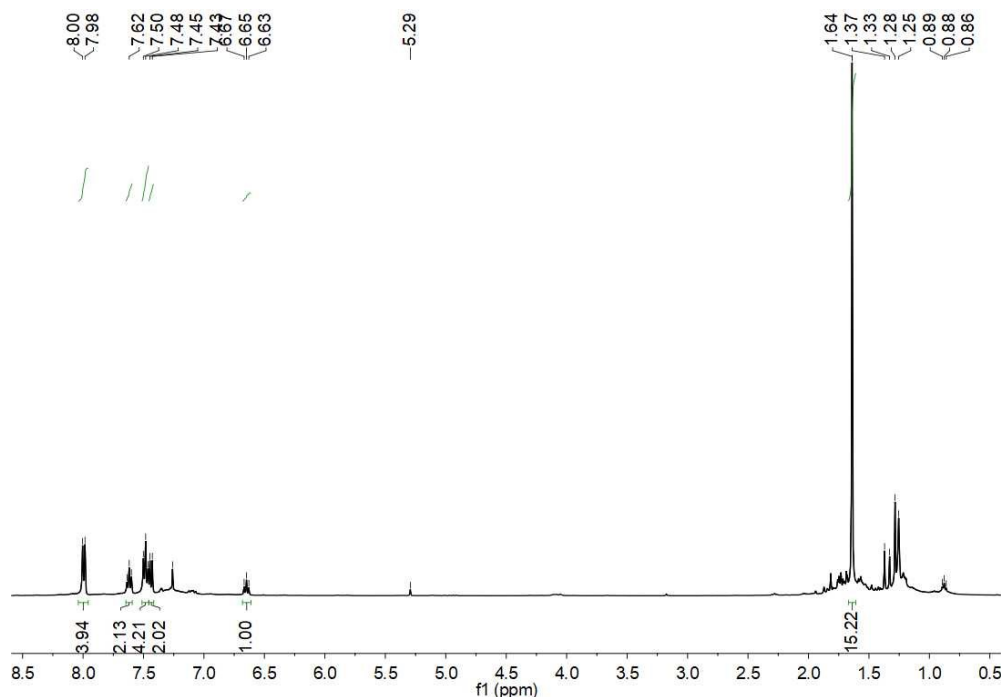

Figure S1.  $^1H$  NMR (400 MHz,  $CDCl_3$ , 298K, ppm) of complex 1.

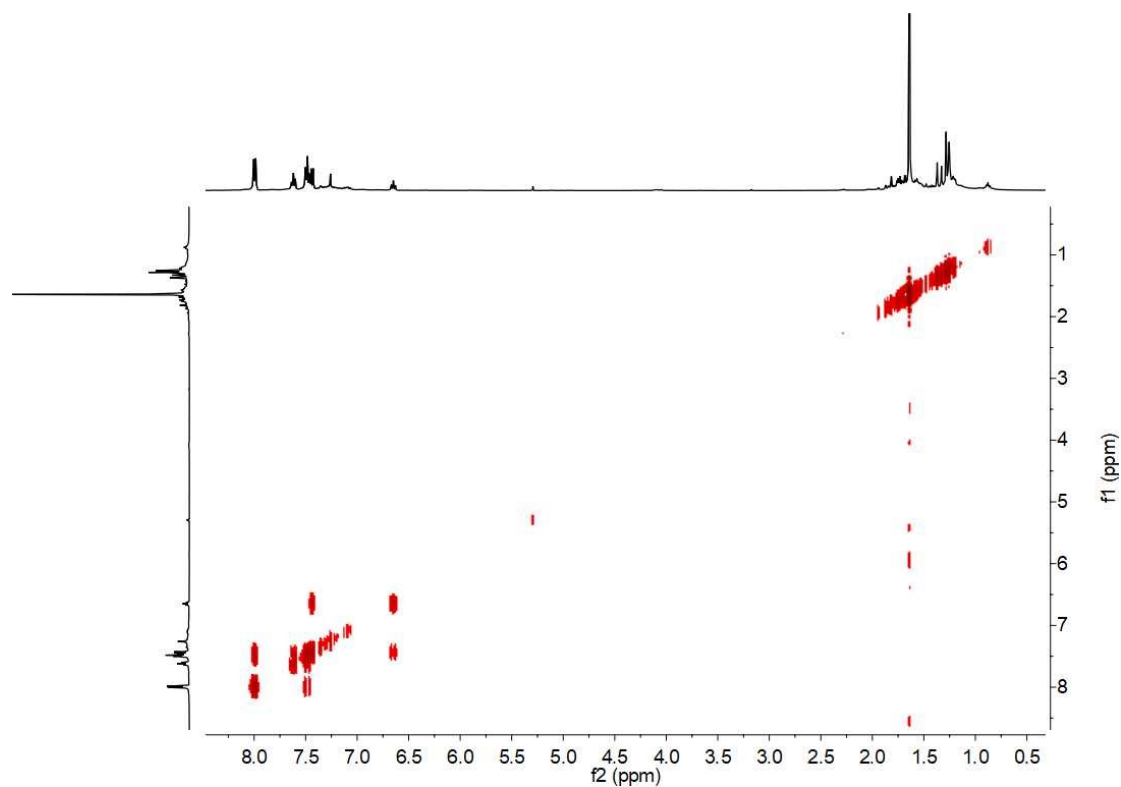

**Figure S2.**  $^1\text{H}$ - $^1\text{H}$  COSY NMR (400 MHz,  $\text{CDCl}_3$ , 298K, ppm) of complex **1**.

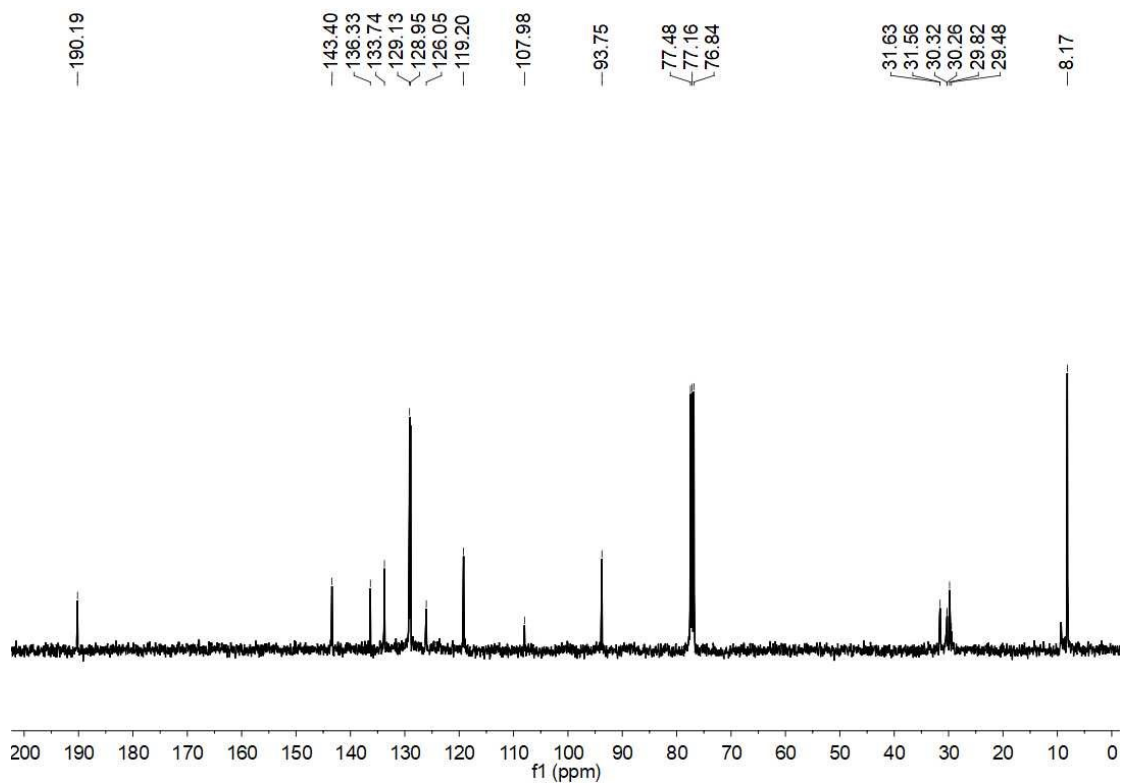

**Figure S3.**  $^{13}\text{C}\{^1\text{H}\}$  NMR (101 MHz,  $\text{CDCl}_3$ , 298K, ppm) of complex **1**.

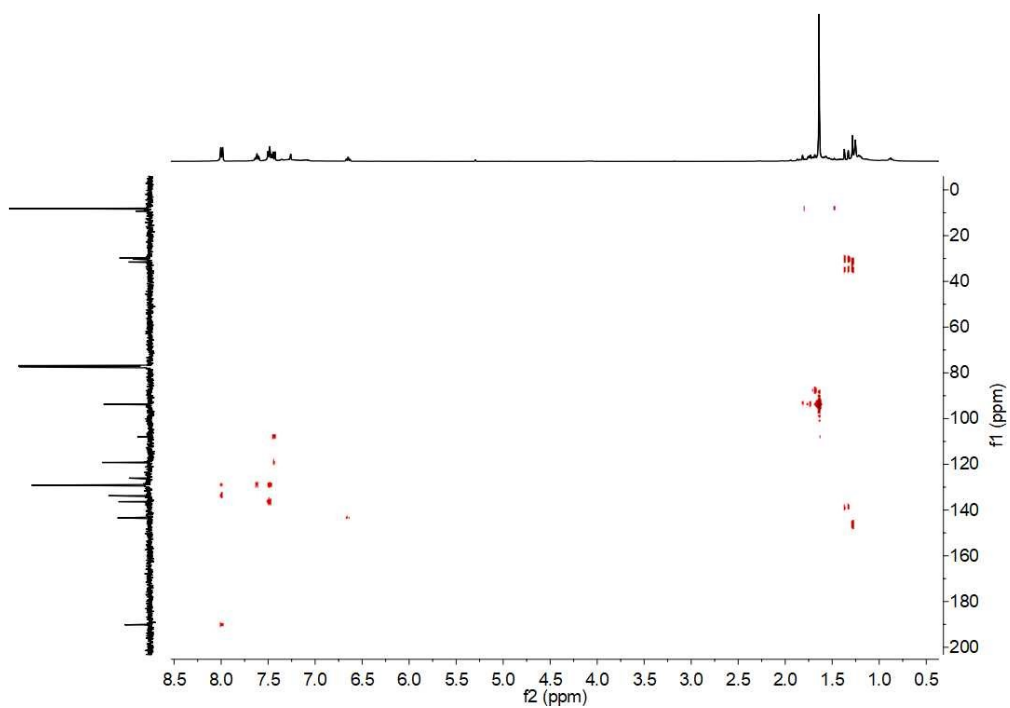

**Figure S4.**  $^{13}\text{C}$ - $^1\text{H}$  HMBC NMR (400 MHz,  $\text{CDCl}_3$ , 298K) of complex **1**.

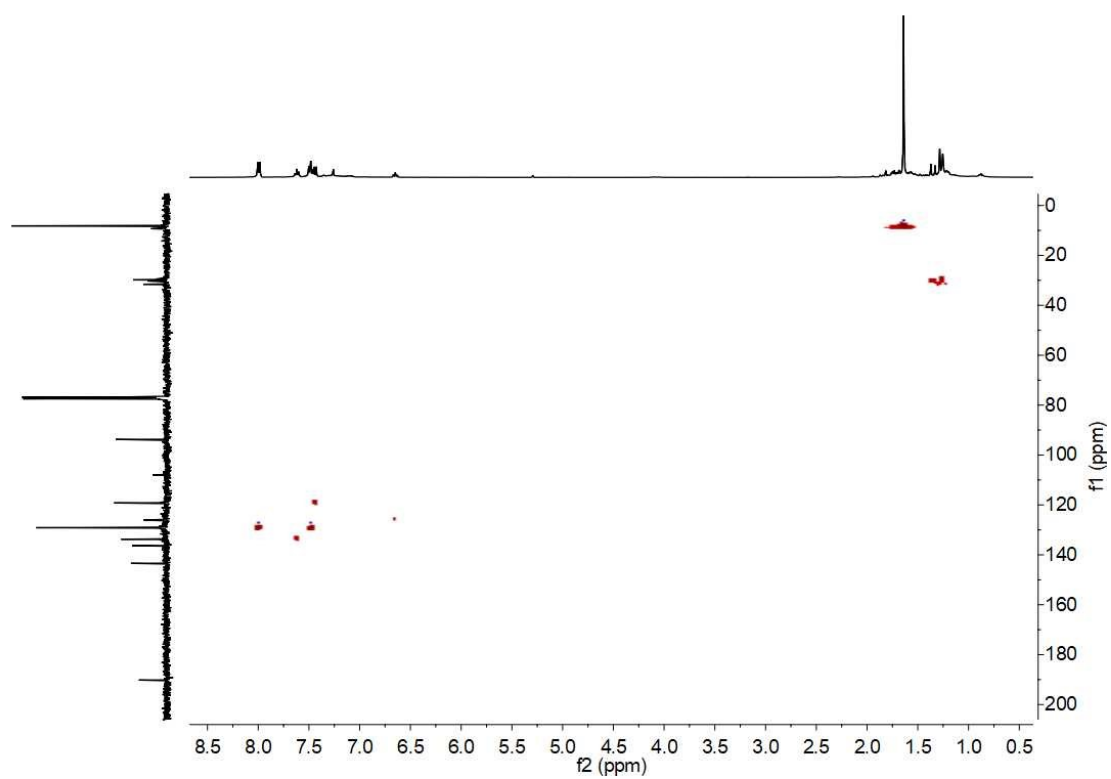

**Figure S5.**  $^{13}\text{C}$ - $^1\text{H}$  HSQC NMR (400 MHz,  $\text{CDCl}_3$ , 298K) of complex **1**.

m-ph-Ir  
19F m-ncs-ph-ir-6

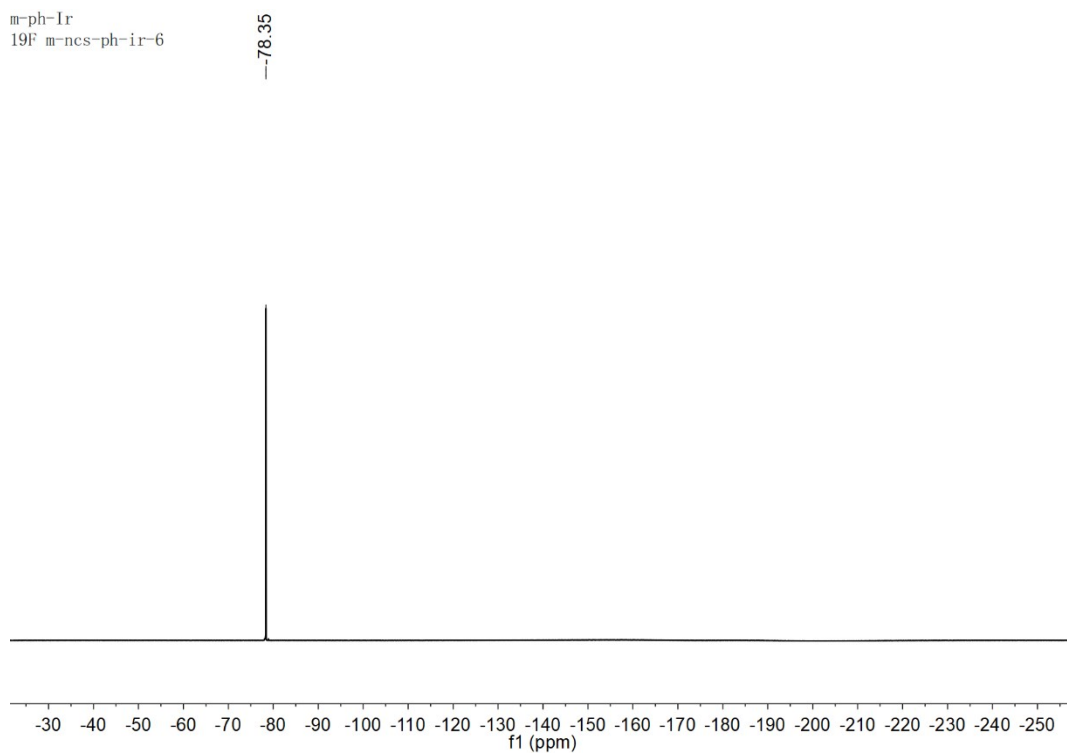

**Figure S6.**  $^{19}\text{F}$  NMR (378 MHz,  $\text{CDCl}_3$ , 298K) of complex **1**.

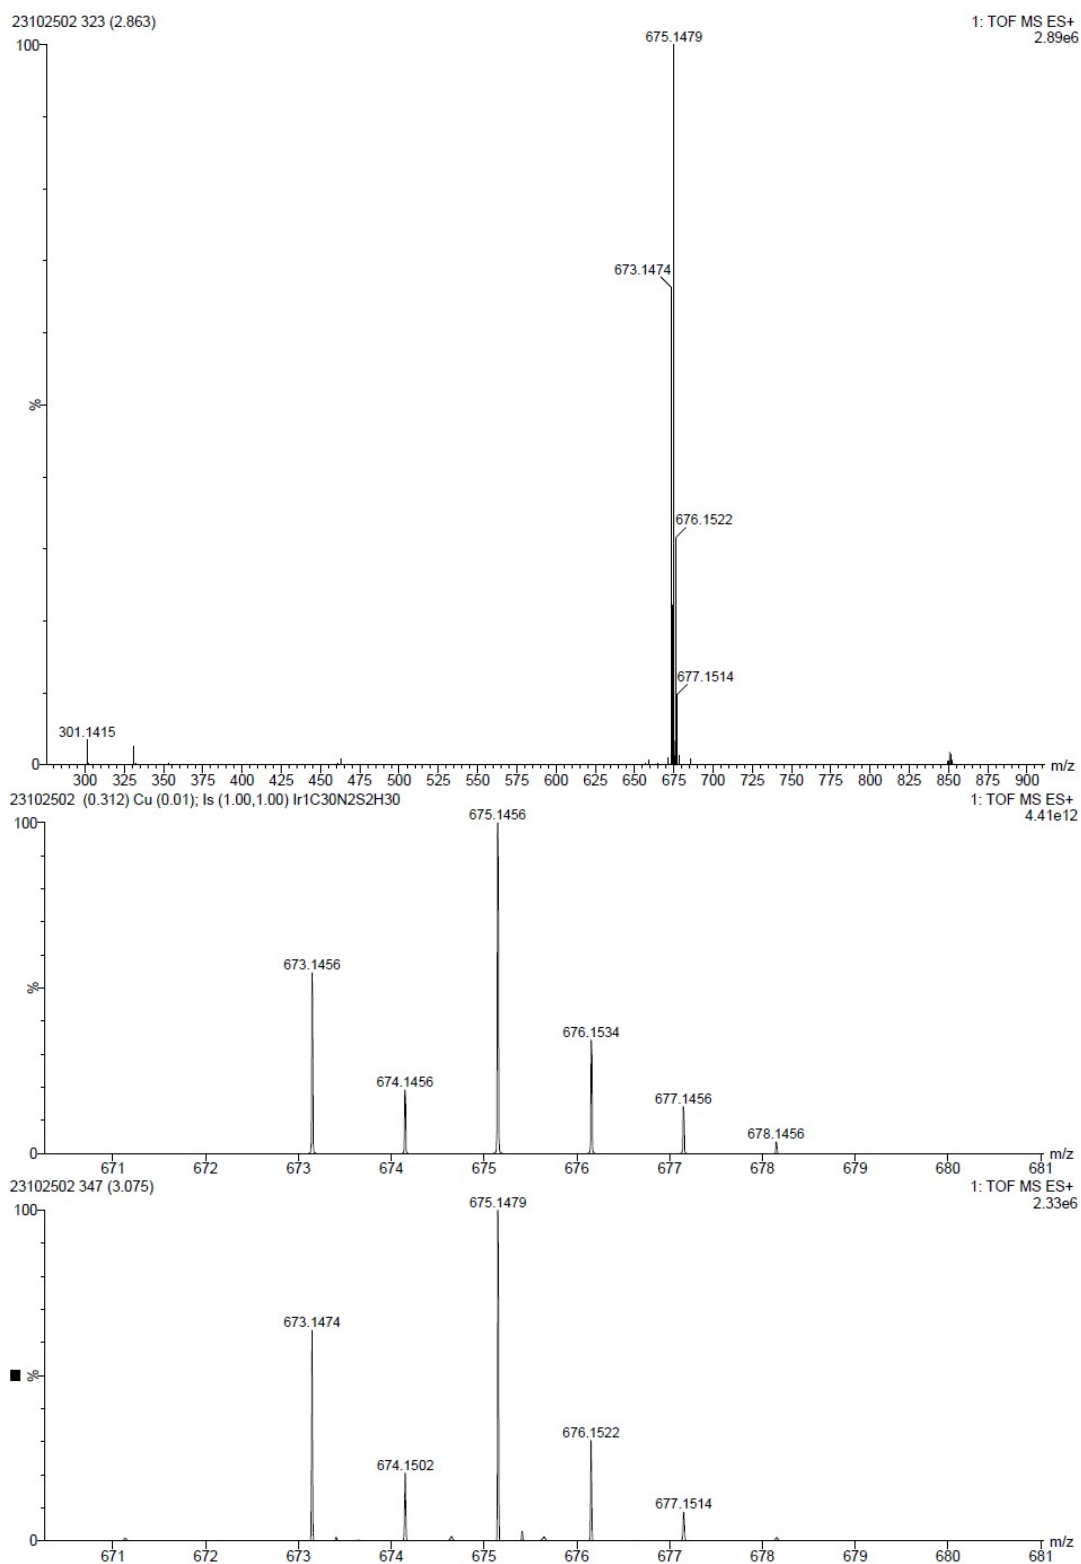

**Figure S7.** Experimental (bottom) and theoretical (top) ESI-MS of complex **1**.



## S2.2 Synthesis and Characterization of complex 2.

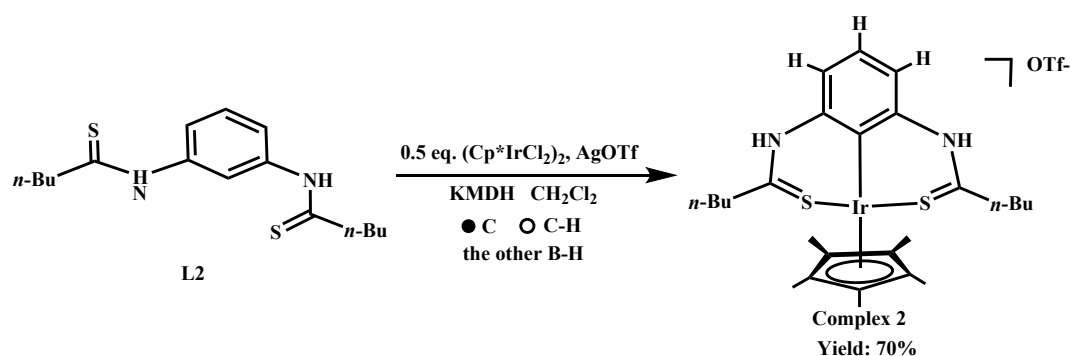

### Scheme S2. Synthesis of complex 2.

Ligand **2** (30.85 mg, 0.10 mmol),  $[\text{Cp}^*\text{IrCl}_2]_2$  (40.40 mg, 0.05 mmol), AgOTf (51.20 mg, 0.20 mmol) and KMDH (0.05 mL) were added to the  $\text{CH}_2\text{Cl}_2$  solution (10 mL) at room temperature. The reaction mixture was stirred in the dark for 8 h. Then the mixture was filtrated and the filtrate was concentrated and further purified via silica gel column chromatography ( $\text{CH}_2\text{Cl}_2$  : MeOH, 10 : 1). Orange solids were obtained and dried under vacuo to give the complex **2**: 54.88 mg 70%.  $^1\text{H}$  NMR (400 MHz;  $\text{CDCl}_3$ , 298K, ppm):  $\delta$  = 1.52 (s, 15H, Cp\*<sup>-</sup>H); 0.94 (t, 6H, Bu-H); 1.43 (m, 4H, Bu-H); 1.77 (t, 4H, Bu-H); 2.85 (m, 4H, Bu-H); 6.52 (t, 1H, Ar-H); 7.01 (d, 2H, Ar-H); 10.94 (s, 2H, N-H).  $^{13}\text{C}\{^1\text{H}\}$  NMR (101 MHz;  $\text{CDCl}_3$ , 298K, ppm):  $\delta$  = 7.84, 93.32 (Cp\*<sup>-</sup>-C), 13.79, 22.35, 31.65, 42.51 (Bu-C); 102.37, 117.80, 125.41, 142.41 (Ar-C); 196.61 (N-C=S). IR (KBr disk,  $\text{cm}^{-1}$ ):  $\nu$  = 3235.20, 2962.96, 2924.42, 2852.87, 2360.30, 1600.41, 1449.93, 1382.42, 1261.69, 1097.10, 1028.25, 864.48, 802.32, 637.20. ESI-MS:  $m/z$  = 635.2096 (calcd for  $[\text{M} - \text{OTf}]^+ = 635.2083$ ).

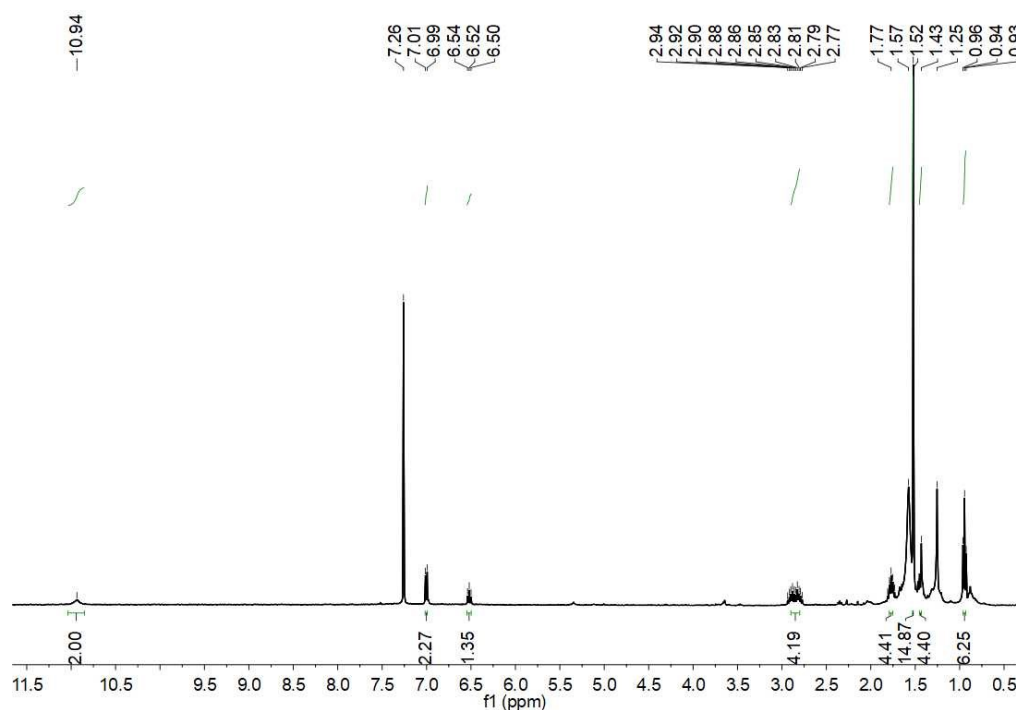

Figure S8.  $^1\text{H}$  NMR (400 MHz,  $\text{CDCl}_3$ , 298K, ppm) of complex **2**.

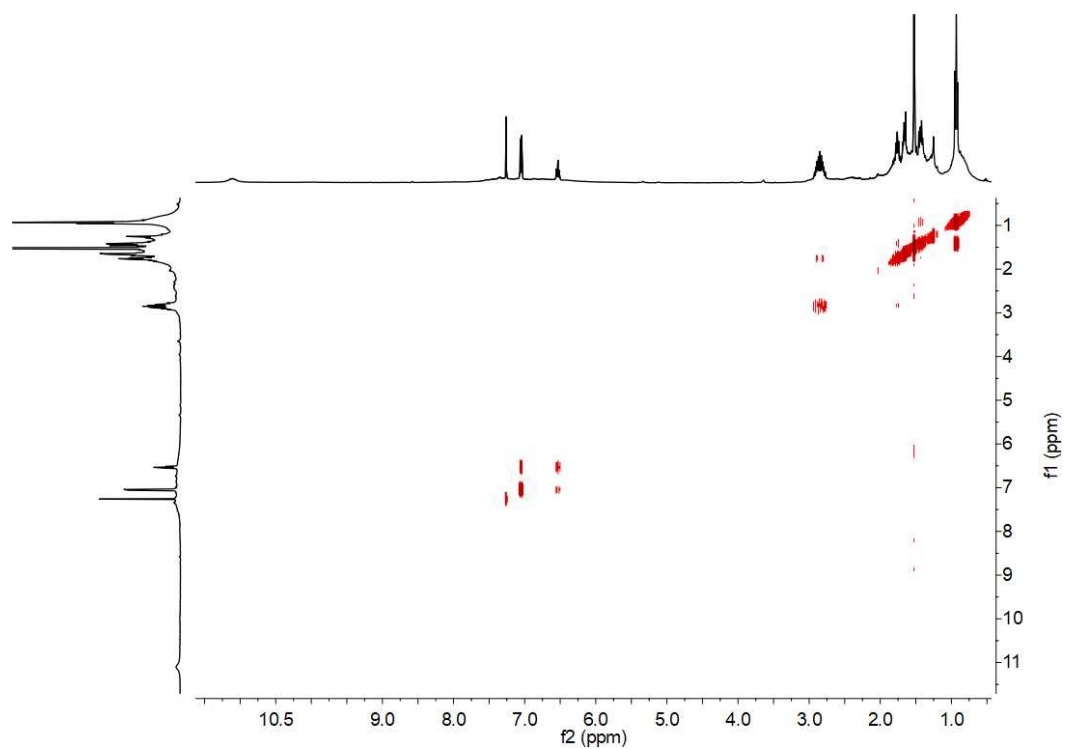

**Figure S9.**  $^1\text{H}$ - $^1\text{H}$  COSY NMR (400 MHz,  $\text{CDCl}_3$ , 298K, ppm) of complex **2**.

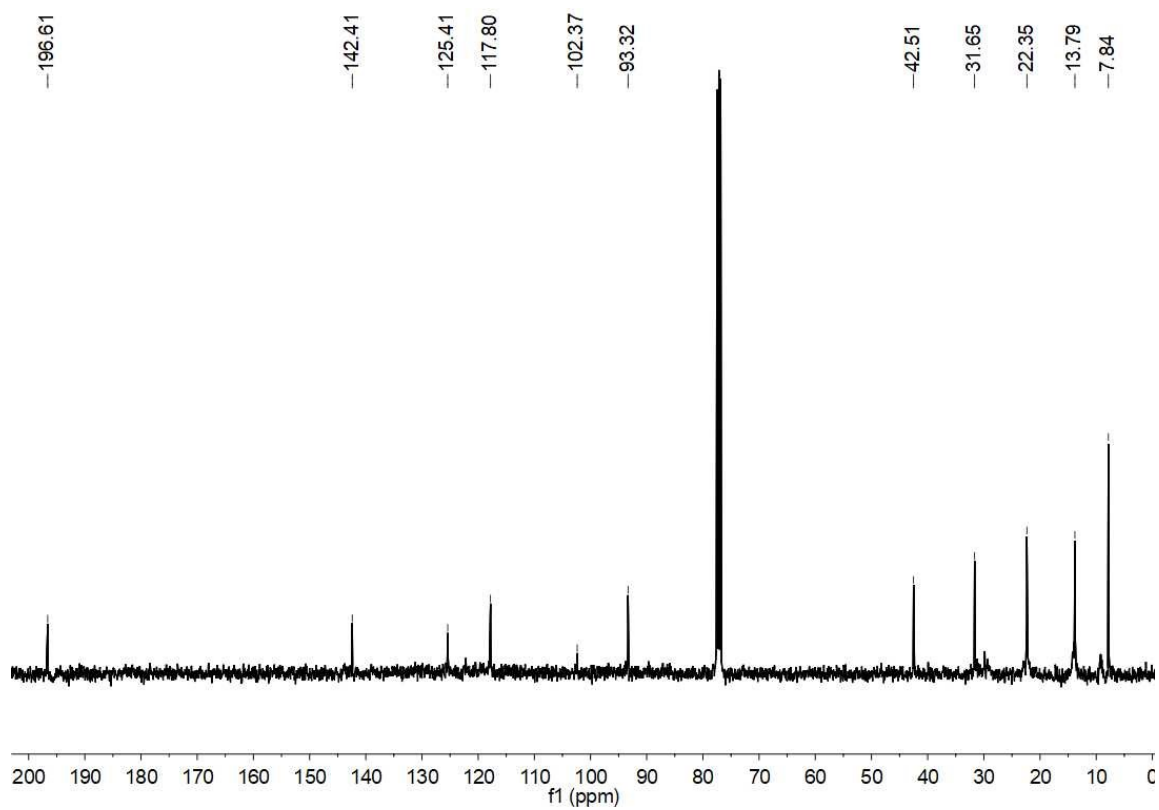

**Figure S10.**  $^{13}\text{C}\{^1\text{H}\}$  NMR (101 MHz,  $\text{CDCl}_3$ , 298K, ppm) of complex **2**.

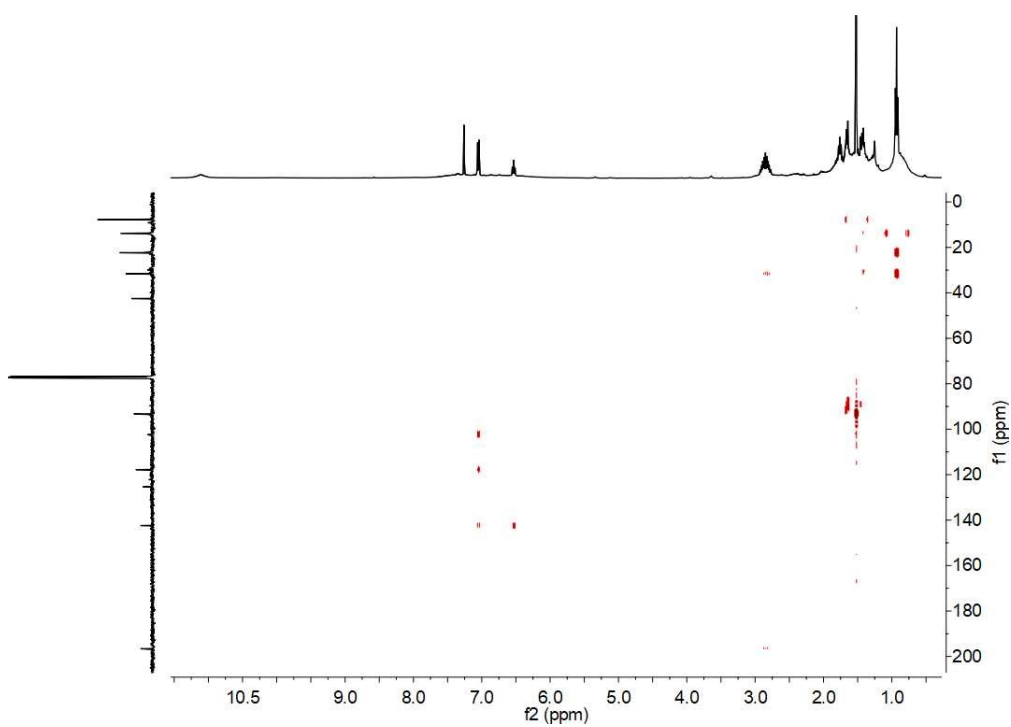

**Figure S11.**  $^{13}\text{C}$ - $^1\text{H}$  HMBC NMR (400 MHz,  $\text{CDCl}_3$ , 298K) of complex 2.

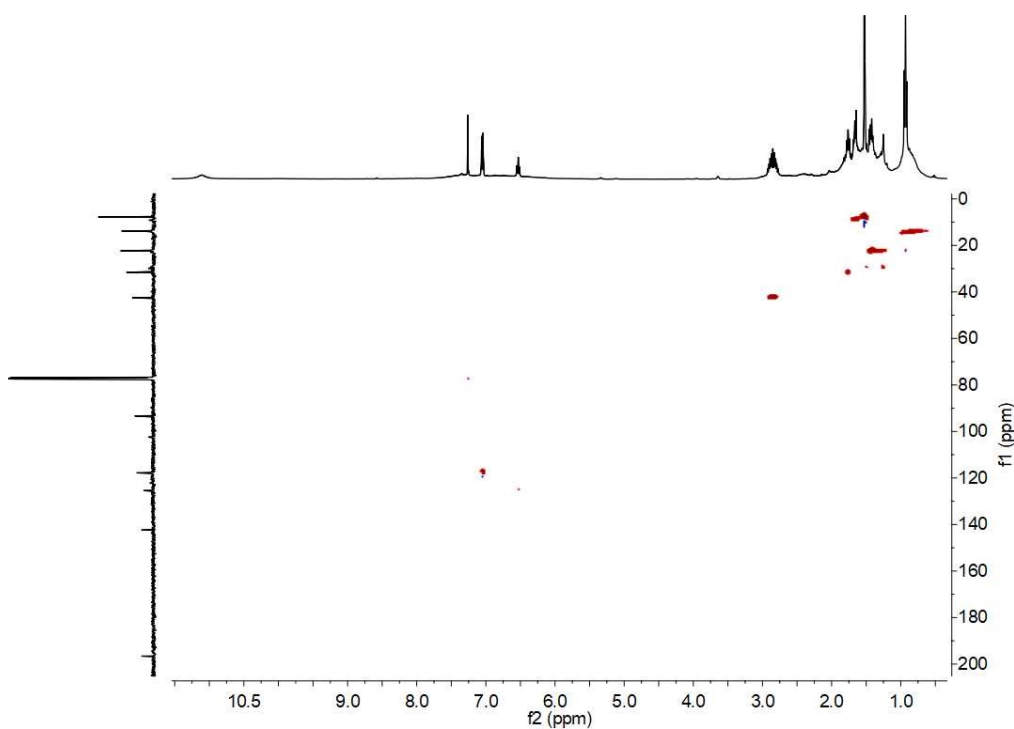

**Figure S12.**  $^{13}\text{C}$ - $^1\text{H}$  HSQC NMR (400 MHz,  $\text{CDCl}_3$ , 298K) of complex 2.

m-ncs-bu-ir-4  
19F m-ncs-bu-ir

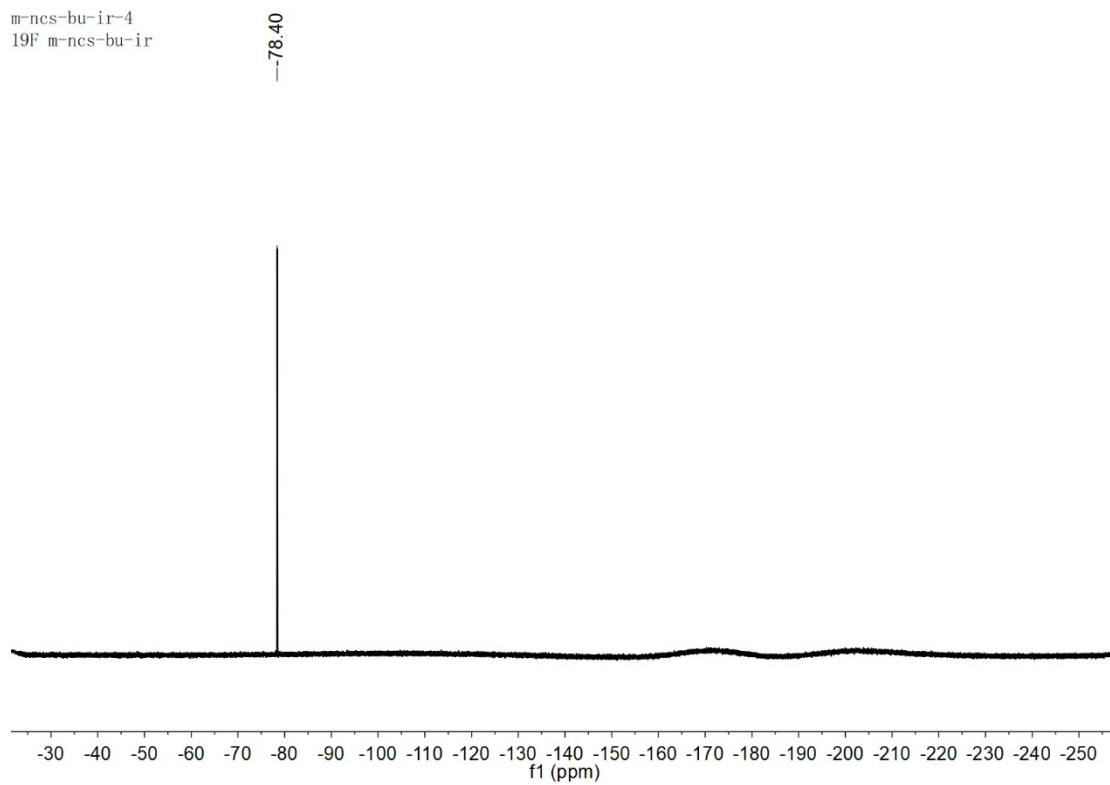

**Figure S13.**  $^{19}\text{F}$  NMR (378 MHz,  $\text{CDCl}_3$ , 298K) of complex **2**.

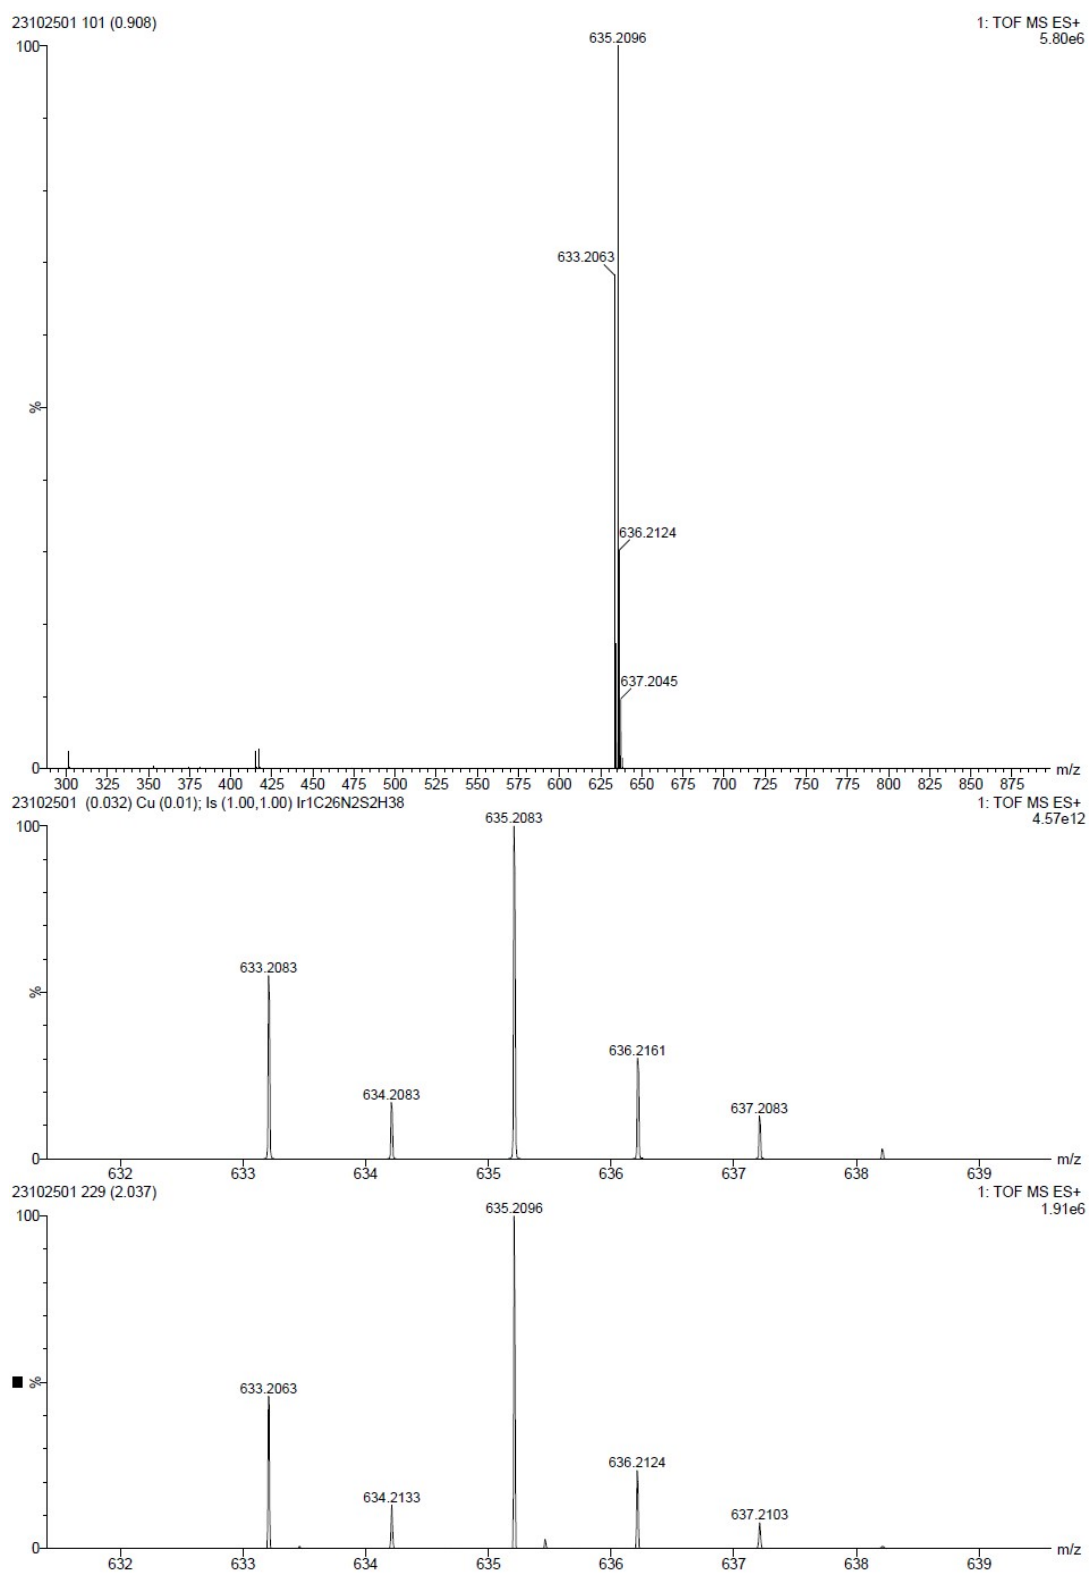

**Figure S14.** Experimental (bottom) and theoretical (top) ESI-MS of complex **2**.

### S2.3 Synthesis and Characterization of Ligand 3.

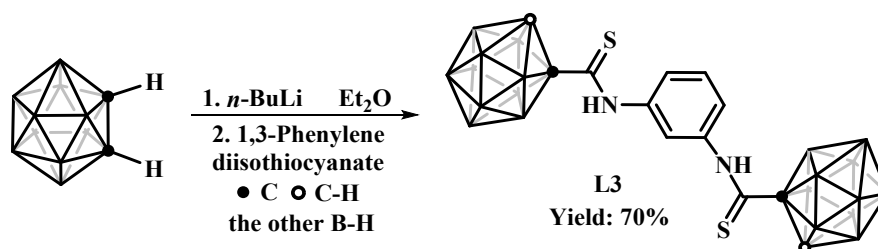

**Scheme S3.** Synthesis of Ligand 3.

A suspension of *n*-BuLi (1.60 mol/L in *n*-hexane, 1.30 mL, 2.00 mmol) was added to a solution of *o*-carborane (288.00 mg, 2.00 mmol) in ether 10 mL at -78 °C over a period of 2 h, then 1,3-Phenylene di-isothiocyanate (192.20 mg, 1.00 mmol) was added at room temperature and the resulting mixture was stirred for 24 h. The reaction mixture was quenched with dilute HCl and the organic phase was separated and the water phase extracted with diethyl ether (3 × 10 mL). The solvent was then removed under vacuo and the residue was purified by column chromatography on silica gel (petroleum ether : CH<sub>2</sub>Cl<sub>2</sub>, 4 : 1). Elution with petroleum ether gave Ligand **3** as a yellow solid (yield: 338.80 mg, 70.0%). <sup>1</sup>H NMR (400 MHz; CDCl<sub>3</sub>, 298K, ppm): δ = 1.79-2.90 (br, 20H, B-H); 4.92 (s, 2H, C<sub>cage</sub>-H); 7.51 (s, 3H, Ar-H); 8.15 (s, 1H, Ar-H); 9.09 (s, 2H, N-H). <sup>13</sup>C{<sup>1</sup>H} NMR (101 MHz; CDCl<sub>3</sub>, 298K, ppm): δ = 60.76, 78.75 (cage C); 119.04, 123.32, 130.16, 138.56 (Ar-C); 186.62 (N-C=S). <sup>11</sup>B NMR (160 MHz, CDCl<sub>3</sub>, 298K, ppm): δ = -2.95, -4.10, -8.39, -9.61, -11.37, -12.55, -13.81. IR (KBr disk, cm<sup>-1</sup>): ν = 3275.83, 3043.45, 2962.24, 2573.55, 1601.41, 1541.56, 1440.57, 1388.87, 1261.21, 1193.67, 1010.66, 787.07. ESI-MS: *m/z* = 482.3756 (calcd for [M + H]<sup>+</sup> = 482.3754).

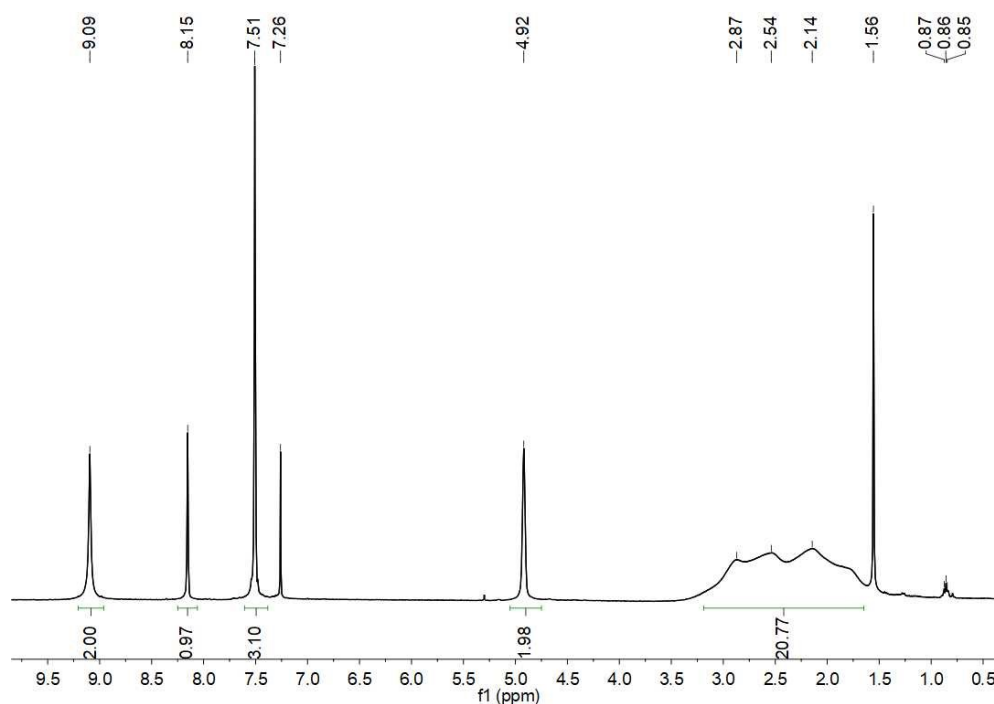

**Figure S15.** <sup>1</sup>H NMR (400 MHz, CDCl<sub>3</sub>, 298K, ppm) of Ligand 3.

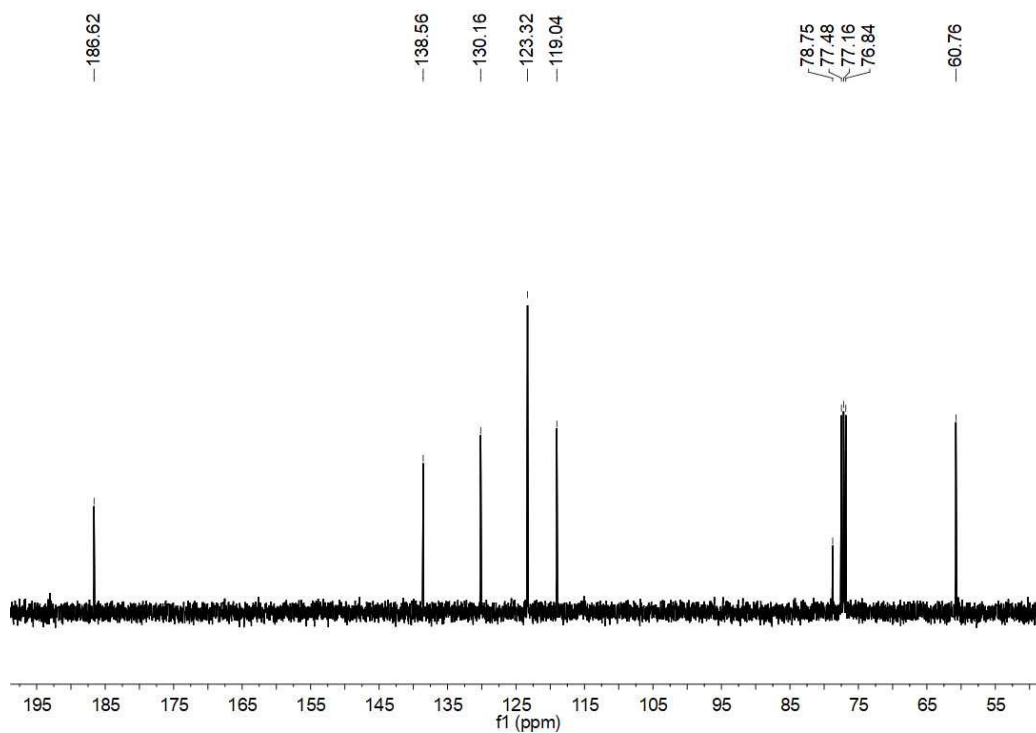

**Figure S16.**  $^{13}\text{C}\{^1\text{H}\}$  NMR (101 MHz,  $\text{CDCl}_3$ , 298K, ppm) of Ligand 3.

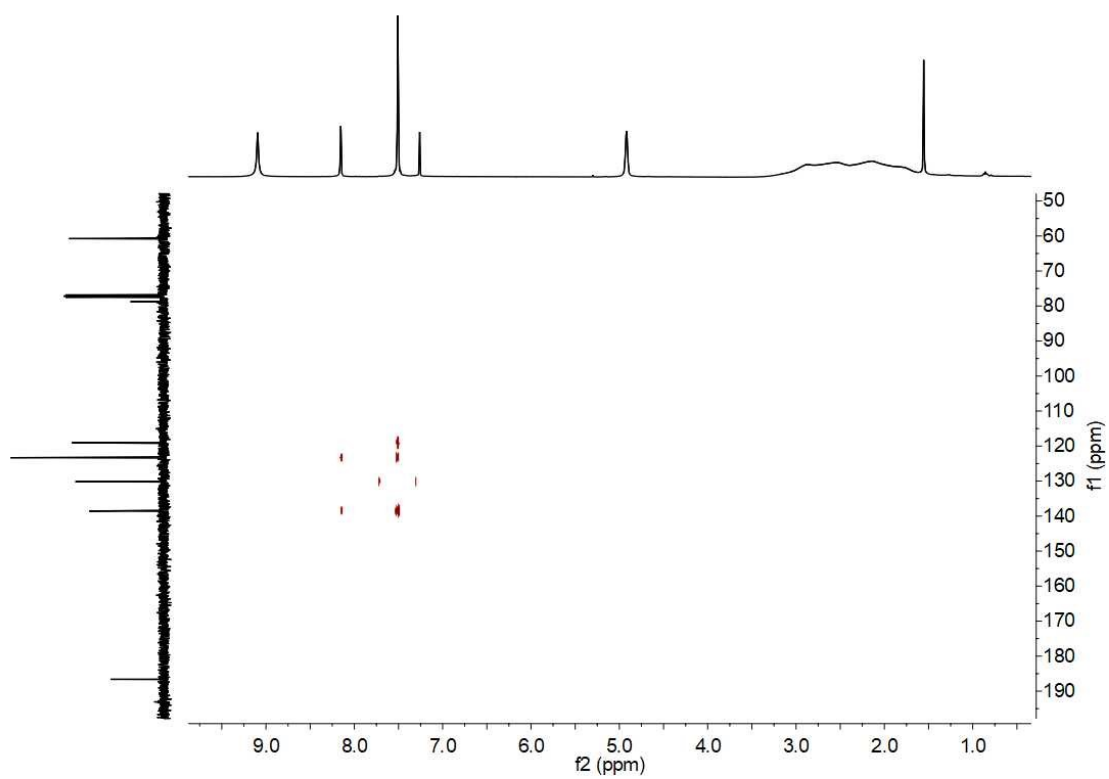

**Figure S17.**  $^{13}\text{C}\text{-}^1\text{H}$  HMBC NMR (400 MHz,  $\text{CDCl}_3$ , 298K) of Ligand 3.

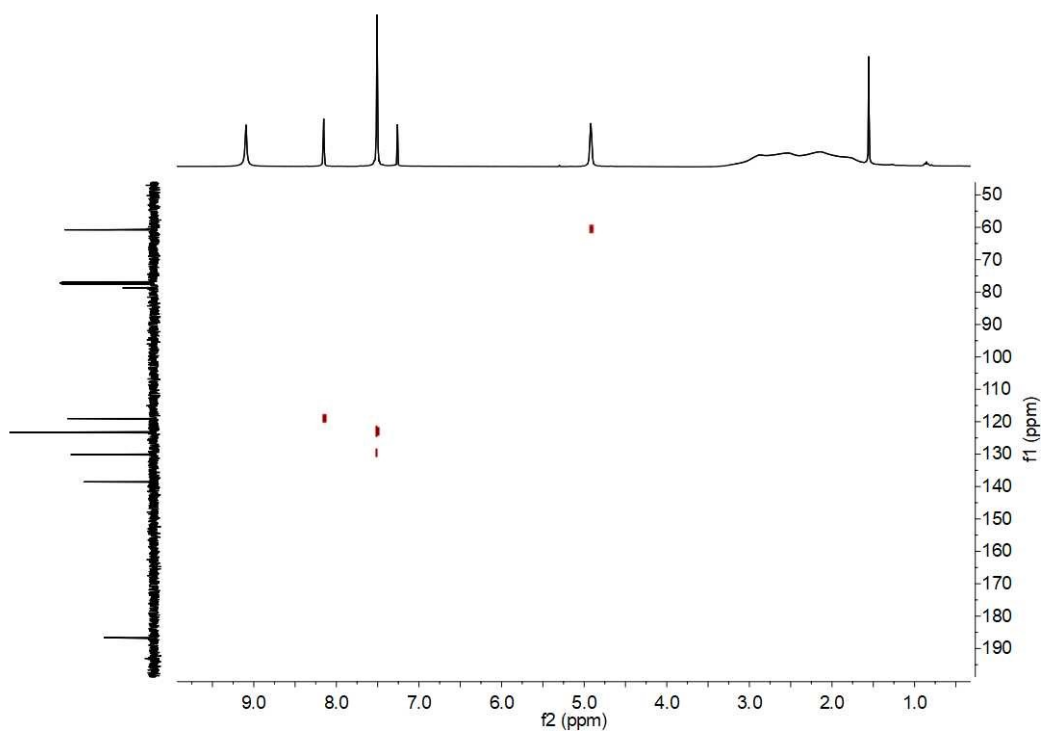

**Figure S18.**  $^{13}\text{C}$ - $^1\text{H}$  HSQC NMR (400 MHz,  $\text{CDCl}_3$ , 298K) of Ligand **3**.

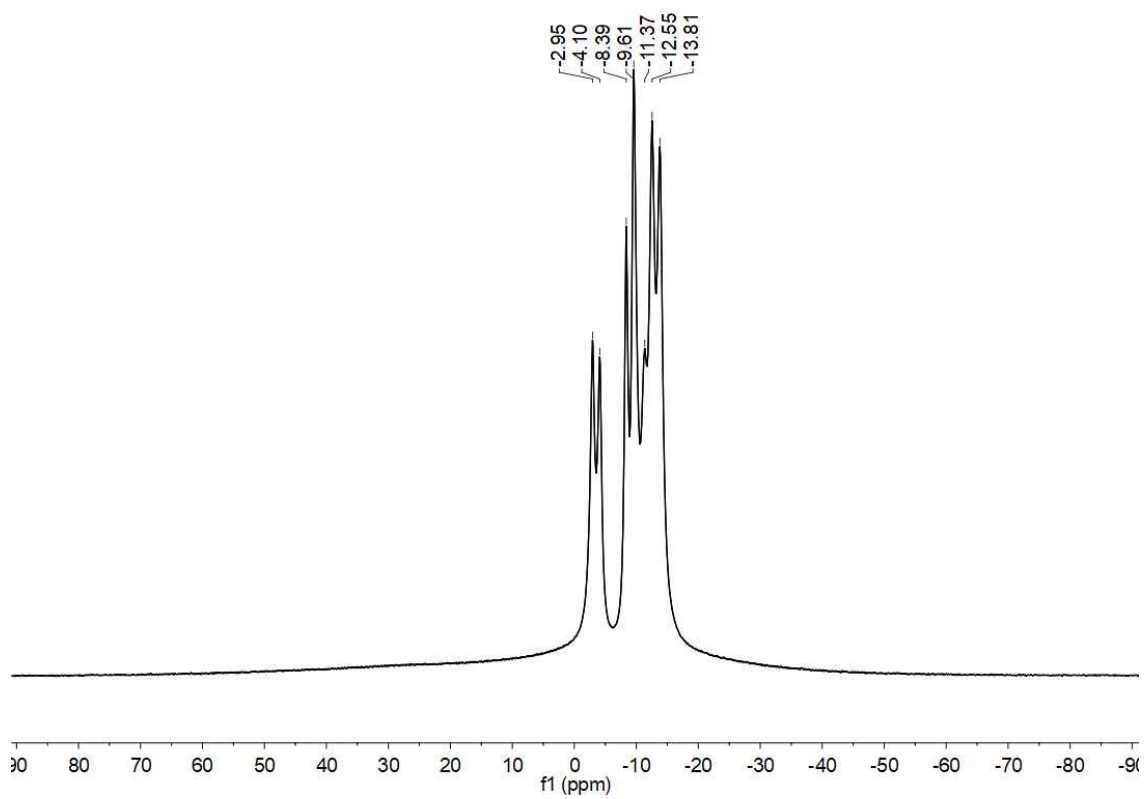

**Figure S19.**  $^{11}\text{B}$  NMR (160 MHz,  $\text{CDCl}_3$ , 298 K, ppm) of Ligand **3**.



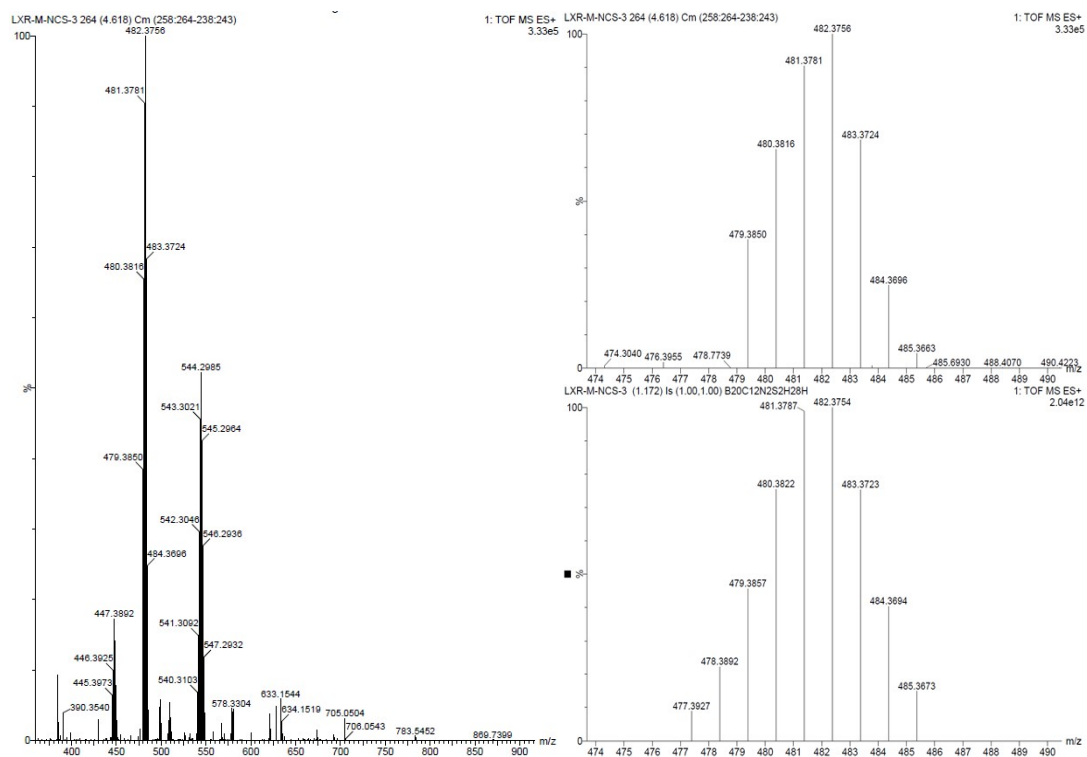

**Figure S20.** Experimental (top) and theoretical (bottom) ESI-MS of Ligand 3.

## S2.4 Synthesis and Characterization of Ligand 4.

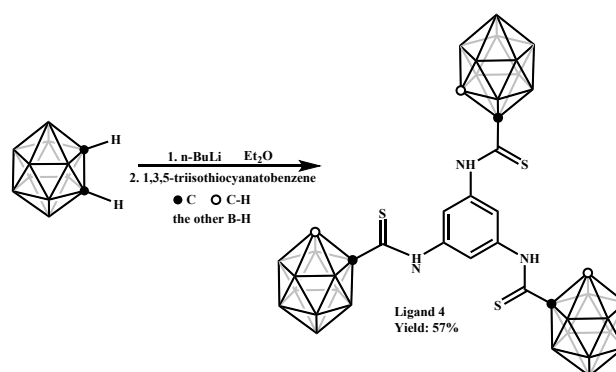

### Scheme S4. Synthesis of Ligand 4.

A suspension of *n*-BuLi (1.60 mol/L in *n*-hexane, 2.10 mL, 3.00 mmol) was added to a solution of *o*-carborane (432.00 mg, 3.00 mmol) in ether 10 mL at -78 °C over a period of 2 h, then 1,3,5-trisothiocyantobenzene (249.30 mg, 1.00 mmol) was added at room temperature and the resulting mixture was stirred for 24 h. The reaction mixture was quenched with dilute HCl and the organic phase was separated and the water phase extracted with diethyl ether (3 × 10 mL). The solvent was then removed under vacuo and the residue was purified by column chromatography on silica gel (petroleum ether: CH<sub>2</sub>Cl<sub>2</sub>, 2 : 1). Elution with petroleum ether gave Ligand 4 as a yellow solid (yield: 391.60 mg, 57.0%). <sup>1</sup>H NMR (400 MHz; CDCl<sub>3</sub>, 298K, ppm): δ = 1.76-2.95 (br, 30H, B-H); 4.88 (s, 3H, C<sub>cage</sub>-H); 7.95 (s, 3H, Ar-H); 9.10 (s, 3H, N-H). <sup>13</sup>C{<sup>1</sup>H} NMR (101 MHz; CDCl<sub>3</sub>, 298K, ppm): δ = 60.74, 78.65 (cage C); 118.18, 139.12 (Ar-C); 187.07 (N-C=S). <sup>11</sup>B NMR (160 MHz, CDCl<sub>3</sub>, 298K, ppm): δ = -2.87, -4.03, -8.33, -9.55, -12.54, -13.72. IR (KBr disk, cm<sup>-1</sup>): ν = 3355.73, 3048.21, 2961.08, 2587.27, 1608.55, 1545.24, 1376.49, 1260.61, 1013.75, 799.44. ESI-MS: *m/z* = 683.5391 (calcd for [M + H]<sup>+</sup> = 683.5373).

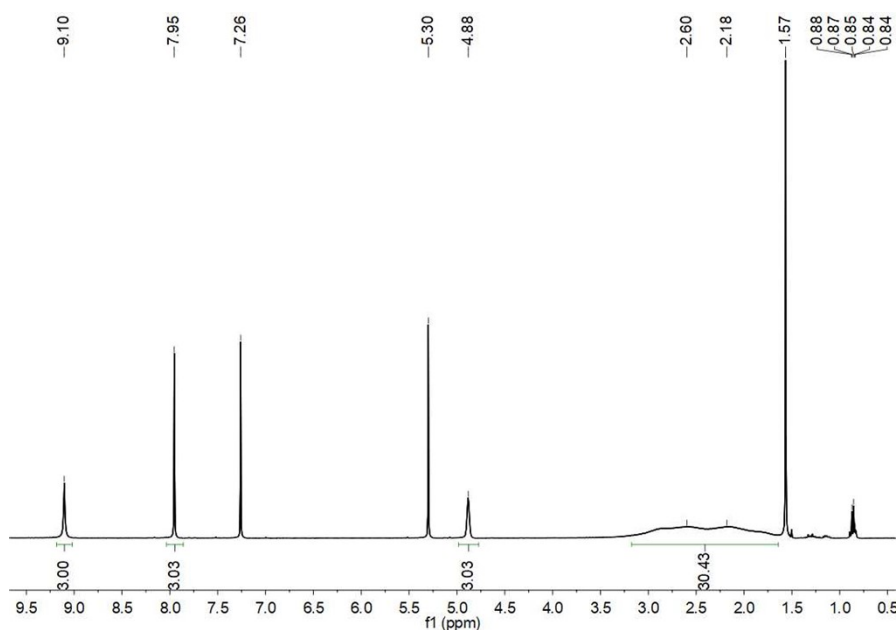

Figure S21. <sup>1</sup>H NMR (400 MHz, CDCl<sub>3</sub>, 298K, ppm) of Ligand 4.

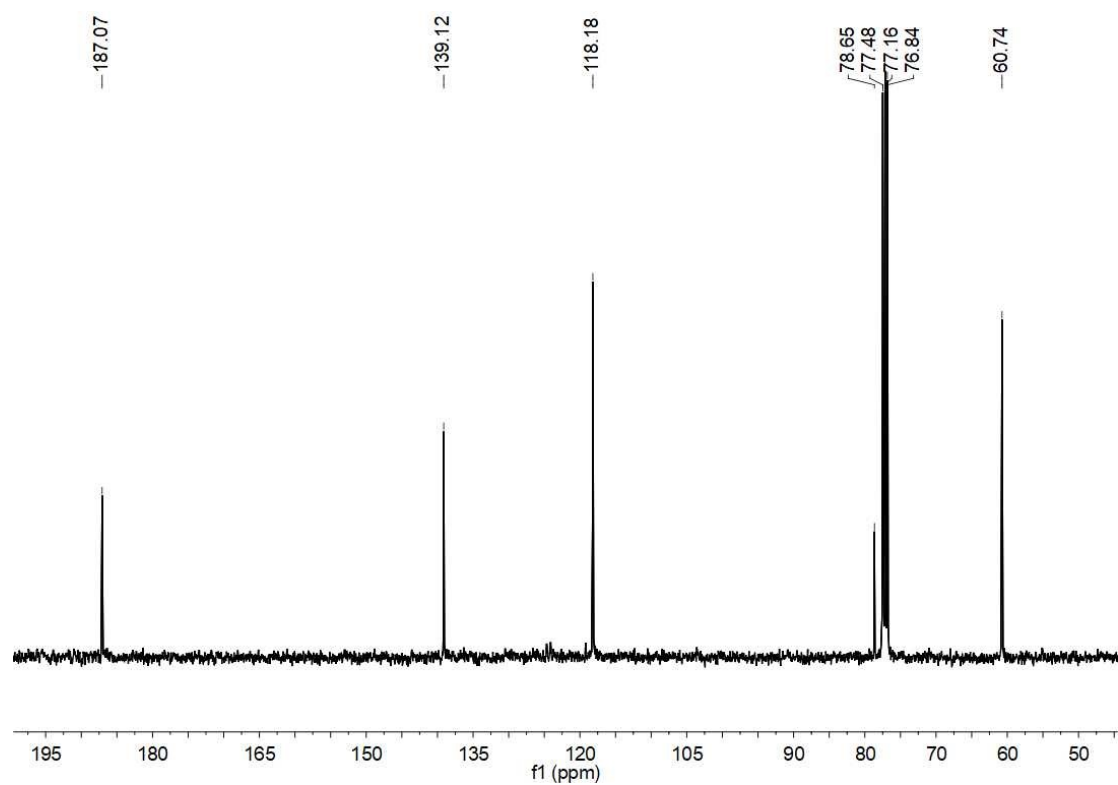

**Figure S22.**  $^{13}\text{C}\{^1\text{H}\}$  NMR (101 MHz,  $\text{CDCl}_3$ , 298K, ppm) of Ligand 4.

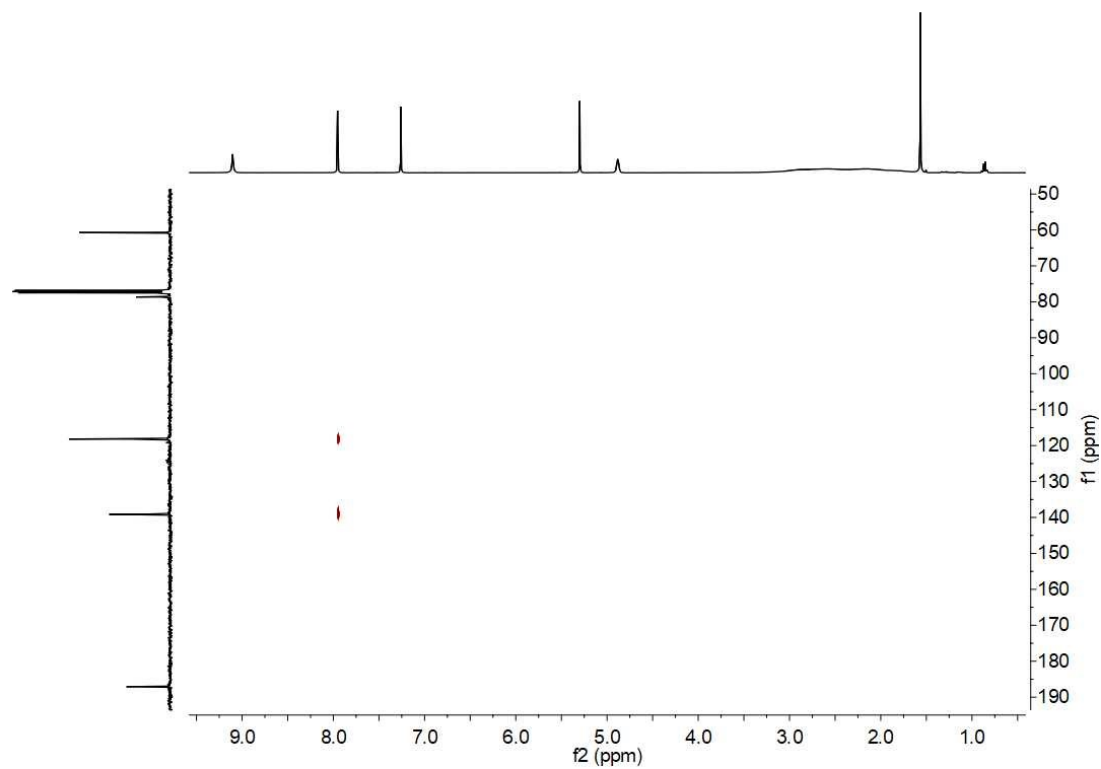

**Figure S23.**  $^{13}\text{C}-^1\text{H}$  HMBC NMR (400 MHz,  $\text{CDCl}_3$ , 298K) of Ligand 4.

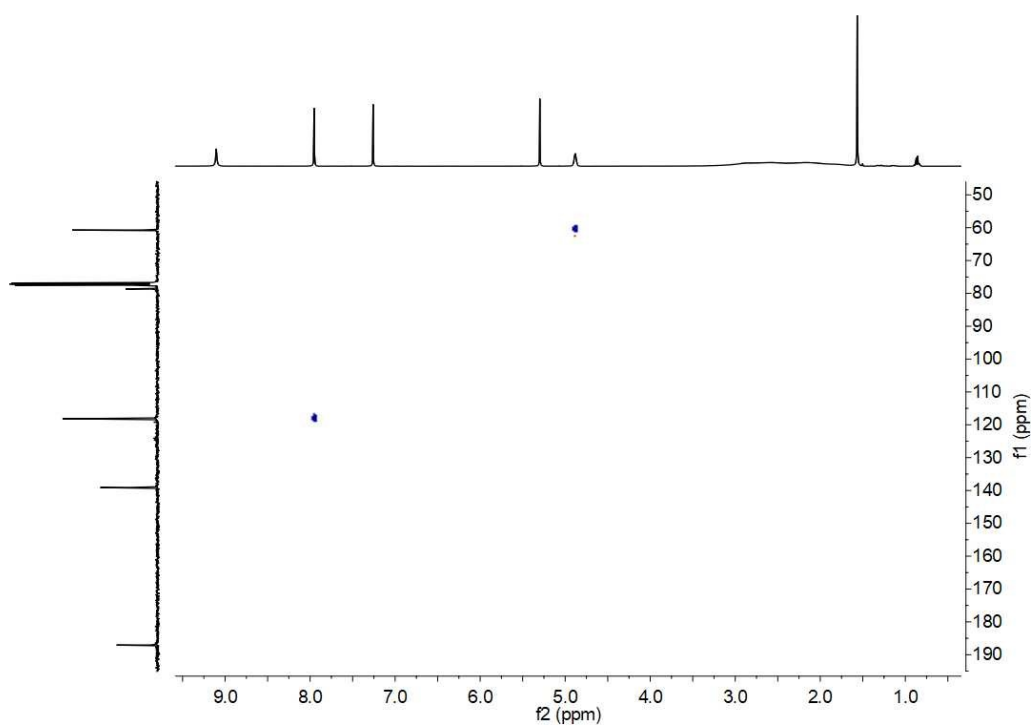

**Figure S24.**  $^{13}\text{C}$ - $^1\text{H}$  HSQC NMR (400 MHz,  $\text{CDCl}_3$ , 298K) of Ligand 4.

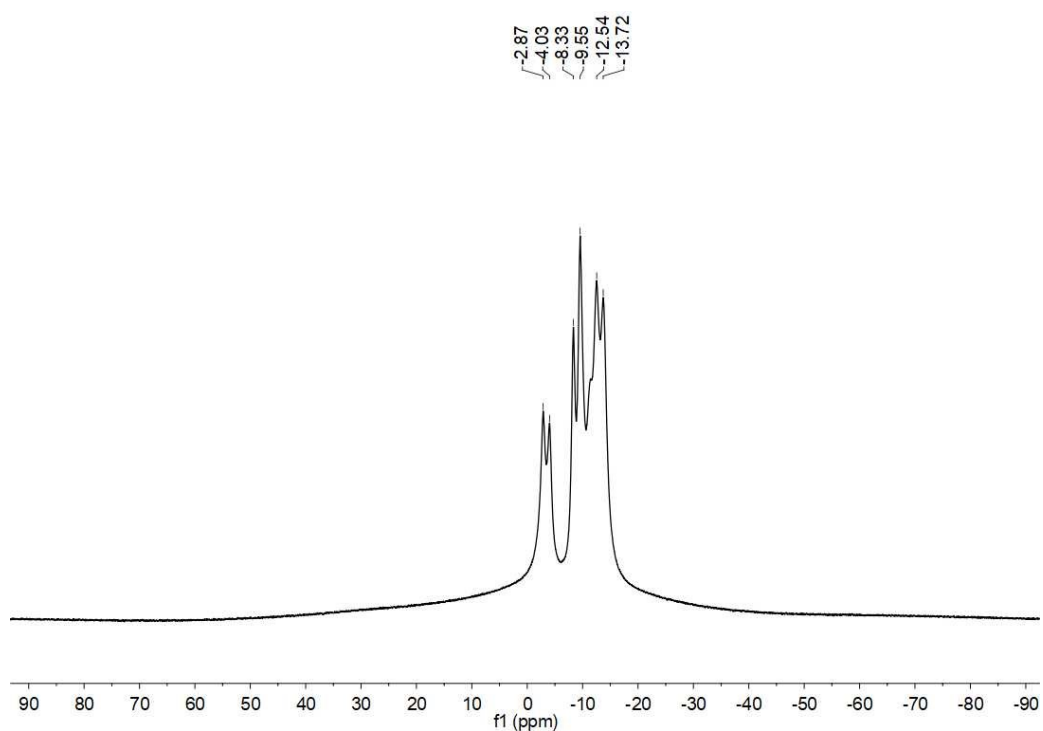

**Figure S25.**  $^{11}\text{B}$  NMR (160 MHz,  $\text{CDCl}_3$ , 298 K, ppm) of Ligand 4.

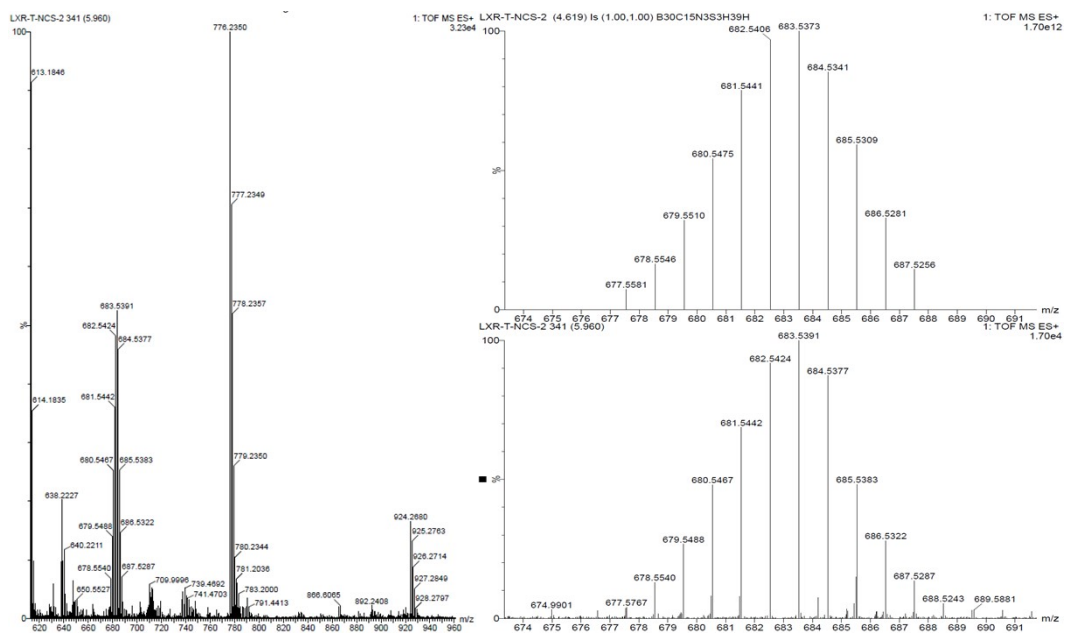

**Figure S26.** Experimental (bottom) and theoretical (top) ESI-MS of Ligand **4**.

## S2.5 Synthesis and Characterization of complex 3a.

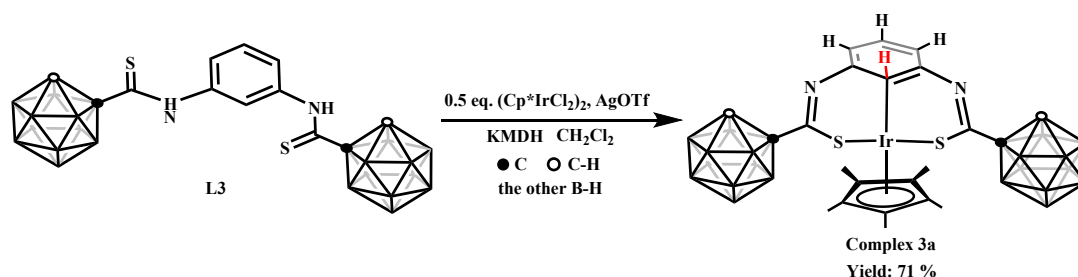

### Scheme S5. Synthesis of complex 3a.

Ligand **3** (48.40 mg, 0.10 mmol), [Cp\*IrCl<sub>2</sub>]<sub>2</sub> (40.40 mg, 0.05 mmol), AgOTf (51.20 mg, 0.20 mmol) and KMDH (0.05 mL) were added to the CH<sub>2</sub>Cl<sub>2</sub> solution (10 mL) at room temperature. The reaction mixture was stirred in the dark for 12 h. Then the mixture was filtrated and the filtrate was concentrated and further purified via silica gel column chromatography (*n*-Hexane : CH<sub>2</sub>Cl<sub>2</sub>, 4 : 1). Pink solids were obtained and dried under vacuo to give the complex **3a**: 57.20 mg 71%. <sup>1</sup>H NMR (400 MHz; CDCl<sub>3</sub>, 298K, ppm): δ = 2.01-2.58 (br, 20H, B-H); 1.10 (s, 15H, Cp\*-H); 4.78 (s, 2H, C<sub>cage</sub>-H); 5.66 (s, 1H, Ar-H); 6.59 (d, 2H, Ar-H); 8.11 (t, 1H, Ar-H). <sup>13</sup>C{<sup>1</sup>H} NMR (101 MHz; CDCl<sub>3</sub>, 298K, ppm): δ = 6.89, 93.08 (Cp\*-C); 58.46 (cage C); 41.71, 118.83, 138.10, 159.92 (Ar-C); 168.03 (N=C-S). <sup>11</sup>B NMR (160 MHz, CDCl<sub>3</sub>, 298K, ppm): δ = -3.20, -4.05, -8.93, -10.00. IR (KBr disk, cm<sup>-1</sup>): ν = 3080.19, 3069.26, 2962.02, 2627.04, 2590.28, 2556.87, 1574.55, 1506.80, 1460.71, 1376.47, 1310.92, 1261.77, 1139.39, 1013.86, 809.33. ESI-MS: m/z = 807.4387 (calcd for [M + H]<sup>+</sup> = 807.4412).

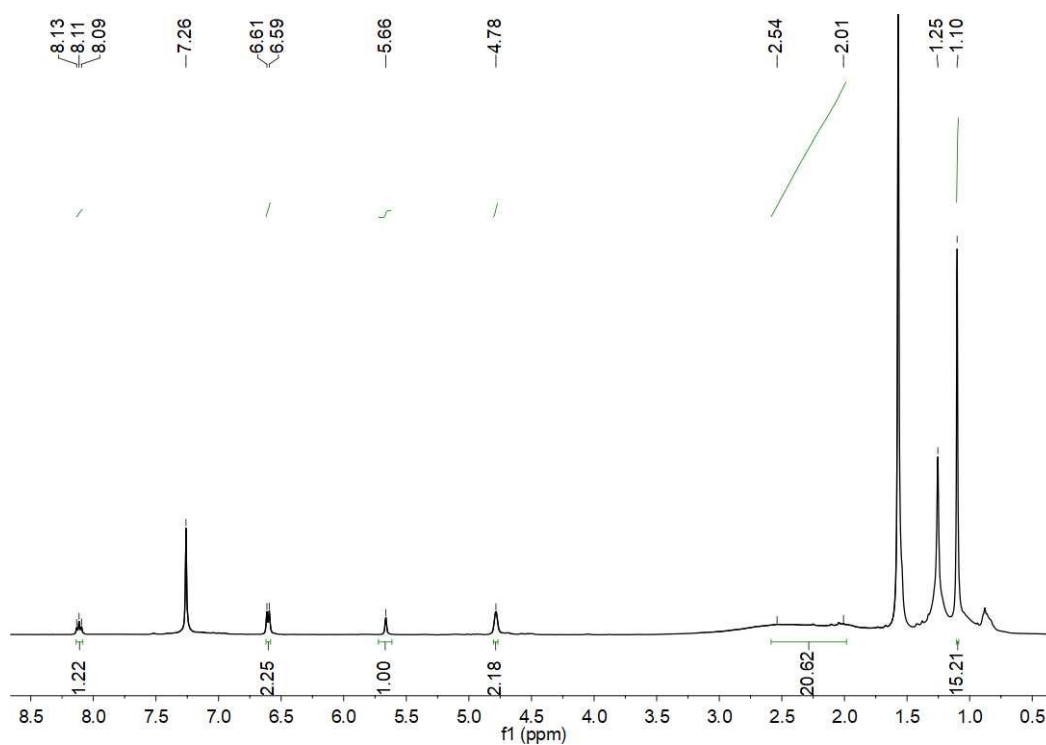

Figure S27. <sup>1</sup>H NMR (400 MHz, CDCl<sub>3</sub>, 298K, ppm) of complex **3a**.

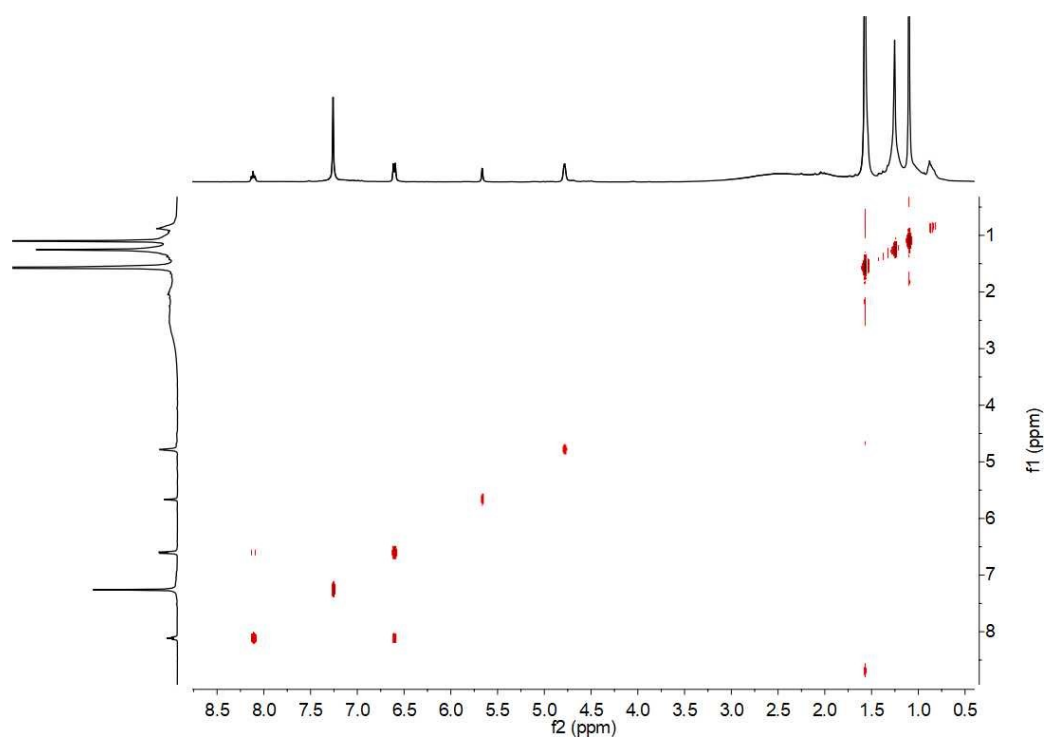

**Figure S28.**  $^1\text{H}$ - $^1\text{H}$  COSY NMR (400 MHz,  $\text{CDCl}_3$ , 298K, ppm) of complex **3a**.

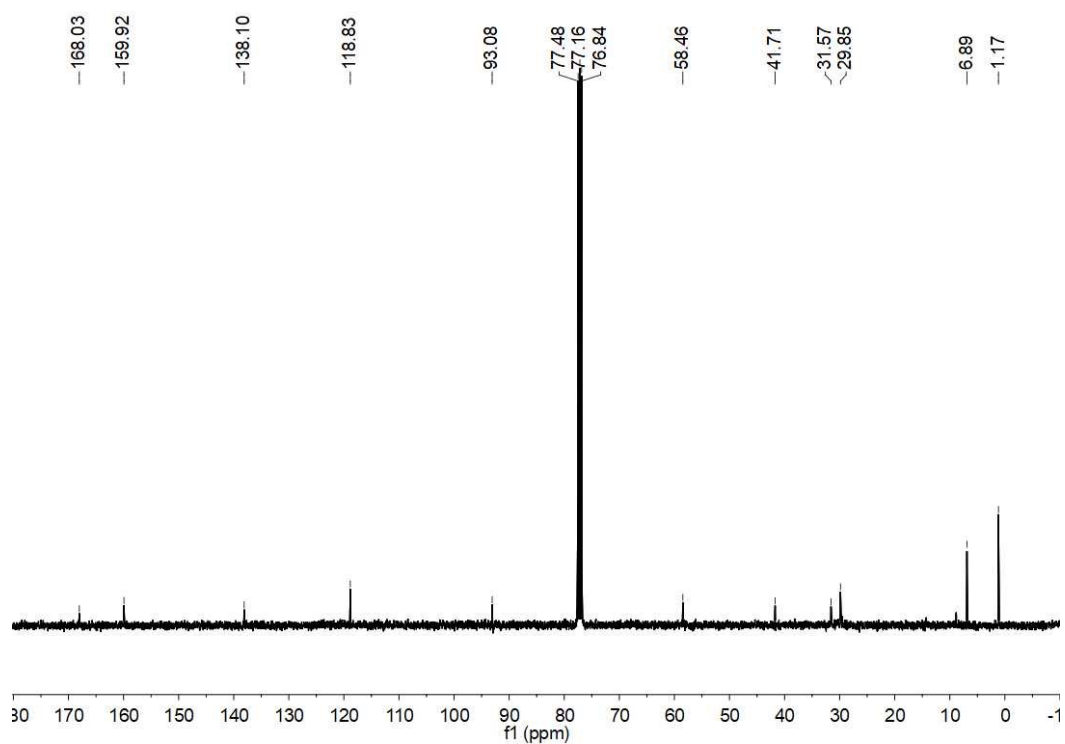

**Figure S29.**  $^{13}\text{C}\{^1\text{H}\}$  NMR (101 MHz,  $\text{CDCl}_3$ , 298K, ppm) of complex **3a**.

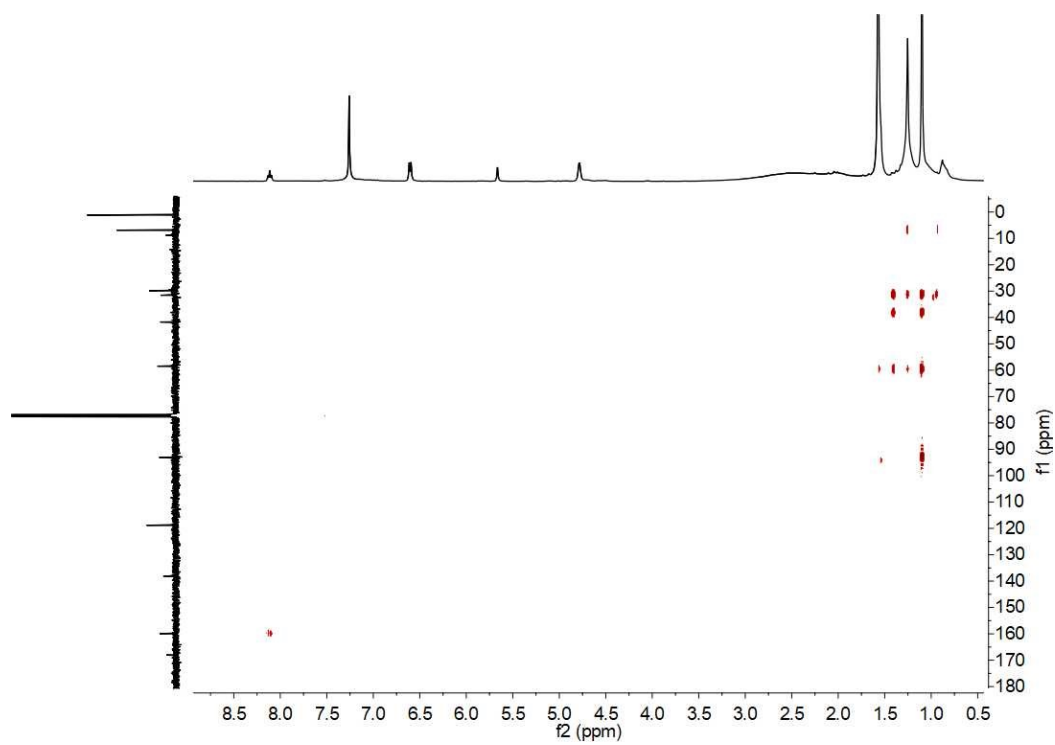

Figure S30.  $^{13}\text{C}$ - $^1\text{H}$  HMBC NMR (400 MHz,  $\text{CDCl}_3$ , 298K) of complex **3a**.

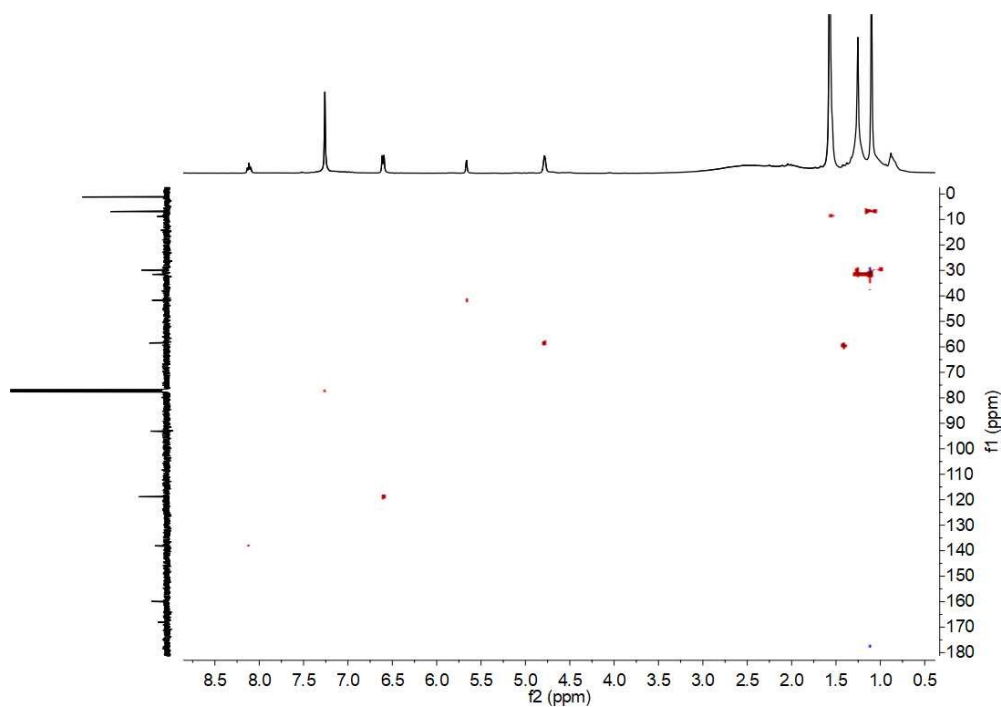

Figure S31.  $^{13}\text{C}$ - $^1\text{H}$  HSQC NMR (400 MHz,  $\text{CDCl}_3$ , 298K) of complex **3a**.



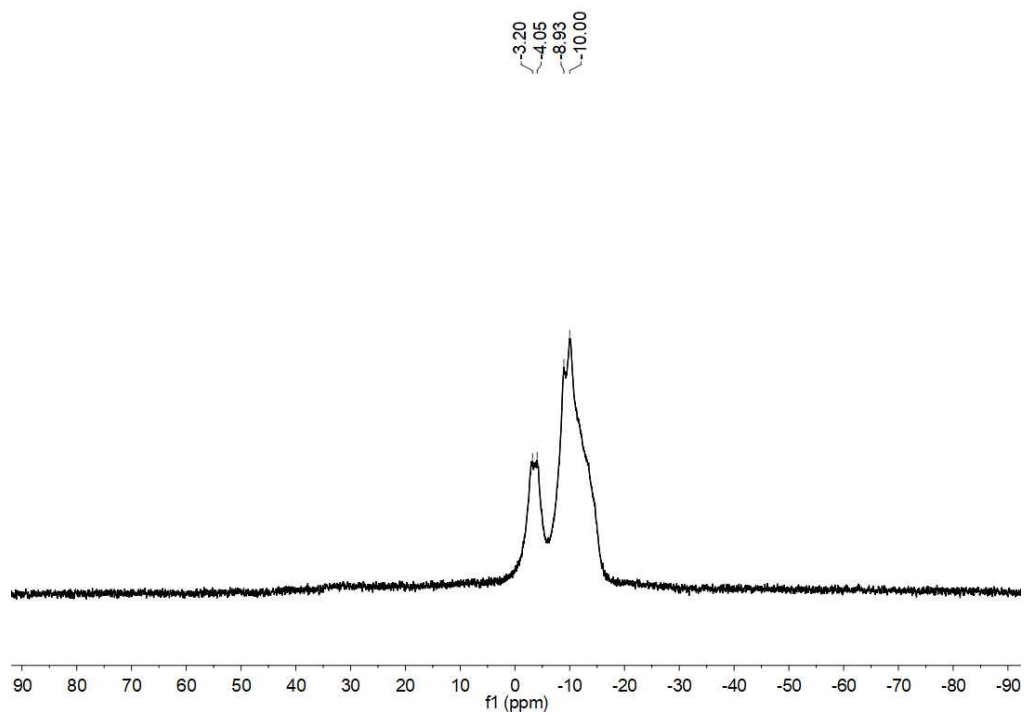

**Figure S32.**  $^{11}\text{B}$  NMR (160 MHz, CDCl<sub>3</sub>, 298 K, ppm) of complex **3a**.

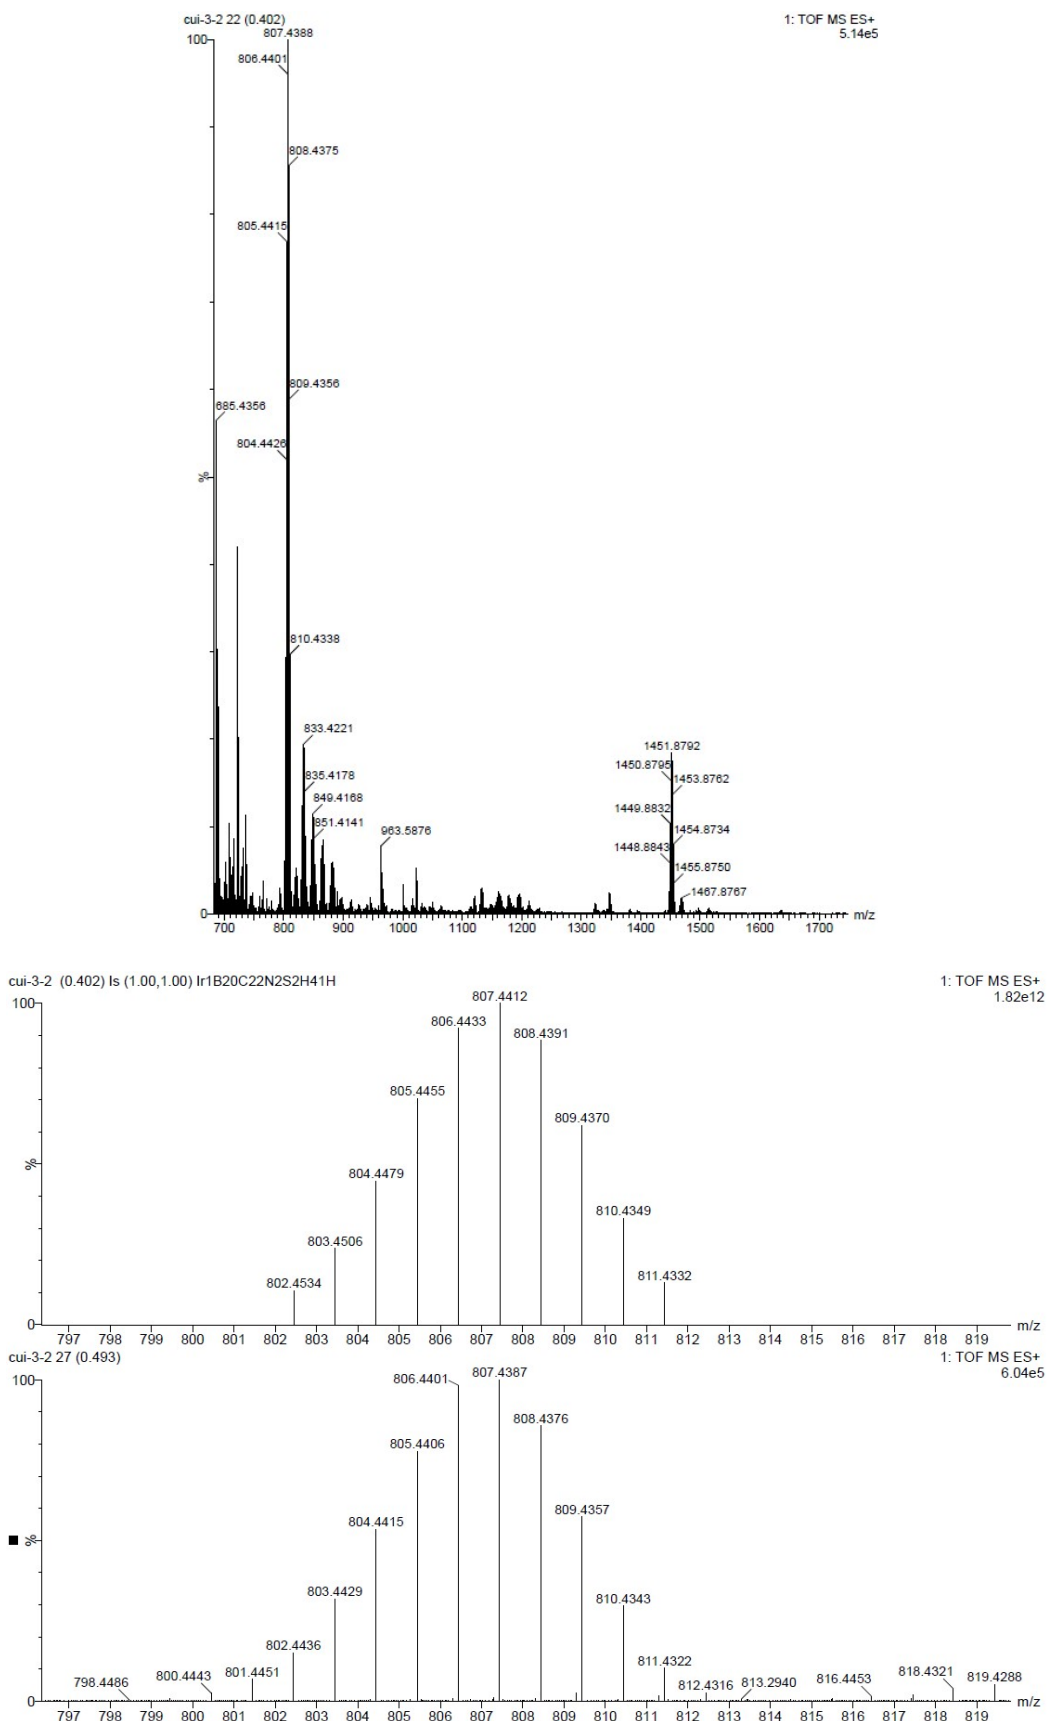

**Figure S33.** Experimental (bottom) and theoretical (top) ESI-MS of complex **3a**.

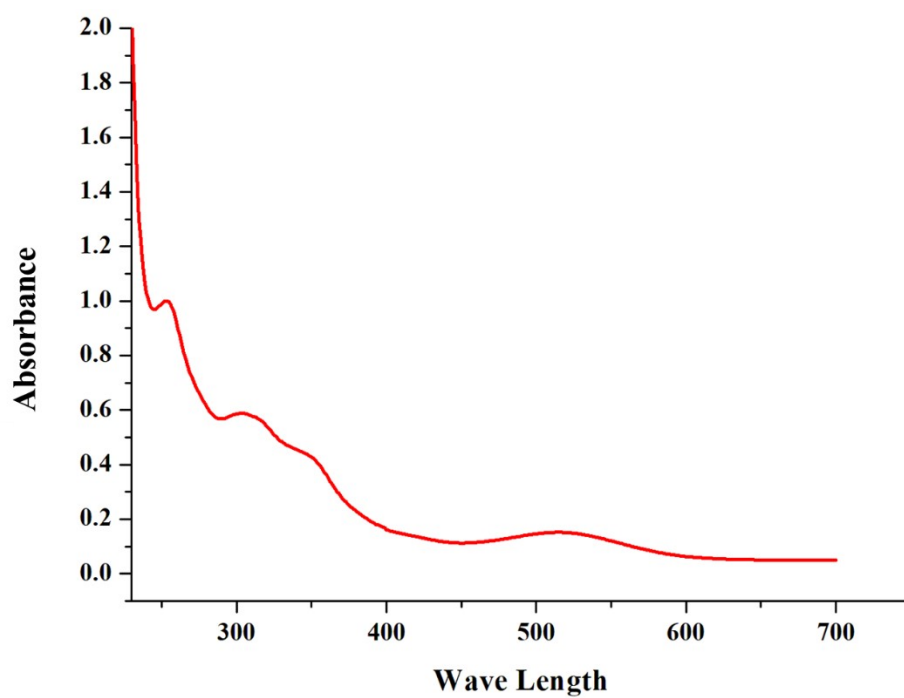

**Figure S34.** UV-visible absorption spectra of complex **3a** in dichloromethane.

## S2.6 Synthesis and Characterization of complex **3b**.

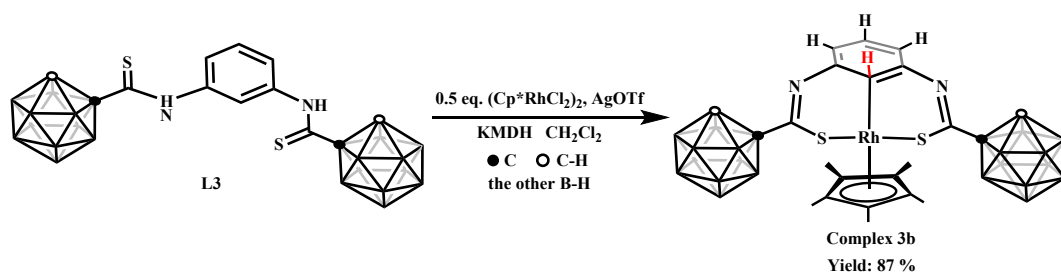

### Scheme S6. Synthesis of complex **3b**.

Ligand **3** (48.40 mg, 0.10 mmol),  $[\text{Cp}^*\text{RhCl}_2]_2$  (30.90 mg, 0.05 mmol), AgOTf (51.20 mg, 0.20 mmol) and KMDH (0.05 mL) were added to the  $\text{CH}_2\text{Cl}_2$  solution (10 mL) at room temperature. The reaction mixture was stirred in the dark for 12 h. Then the mixture was filtrated and the filtrate was concentrated and further purified via silica gel column chromatography (*n*-Hexane :  $\text{CH}_2\text{Cl}_2$ , 3 : 1). Red solids were obtained and dried under vacuo to give the complex **3b**: 62.30 mg 87%.  $^1\text{H}$  NMR (400 MHz;  $\text{CDCl}_3$ , 298K, ppm):  $\delta$  = 1.96-2.54 (br, 20H, B-H); 1.12 (s, 15H,  $\text{Cp}^*\text{-H}$ ); 4.75 (s, 2H,  $\text{C}_{\text{cage}}\text{-H}$ ); 5.91 (s, 1H, Ar-H); 6.65 (d, 2H, Ar-H); 7.92 (t, 1H, Ar-H).  $^{13}\text{C}\{^1\text{H}\}$  NMR (101 MHz;  $\text{CDCl}_3$ , 298K, ppm):  $\delta$  = 7.69, 98.70 ( $\text{Cp}^*\text{-C}$ ), 58.48 (cage C); 56.57, 119.21, 137.23, 159.91 (Ar-C); 170.79 (N=C-S).  $^{11}\text{B}$  NMR (160 MHz,  $\text{CDCl}_3$ , 298K, ppm):  $\delta$  = -3.25, -4.12, -10.26, -13.05. IR (KBr disk,  $\text{cm}^{-1}$ ):  $\nu$  = 3071.45, 2961.92, 2924.04, 2855.10, 2576.54, 1515.58, 1465.80, 1261.73, 1139.59, 1110.58, 1016.61, 803.55. ESI-MS:  $m/z$  = 718.3834 (calcd for  $[\text{M} + \text{H}]^+ = 718.3834$ ).

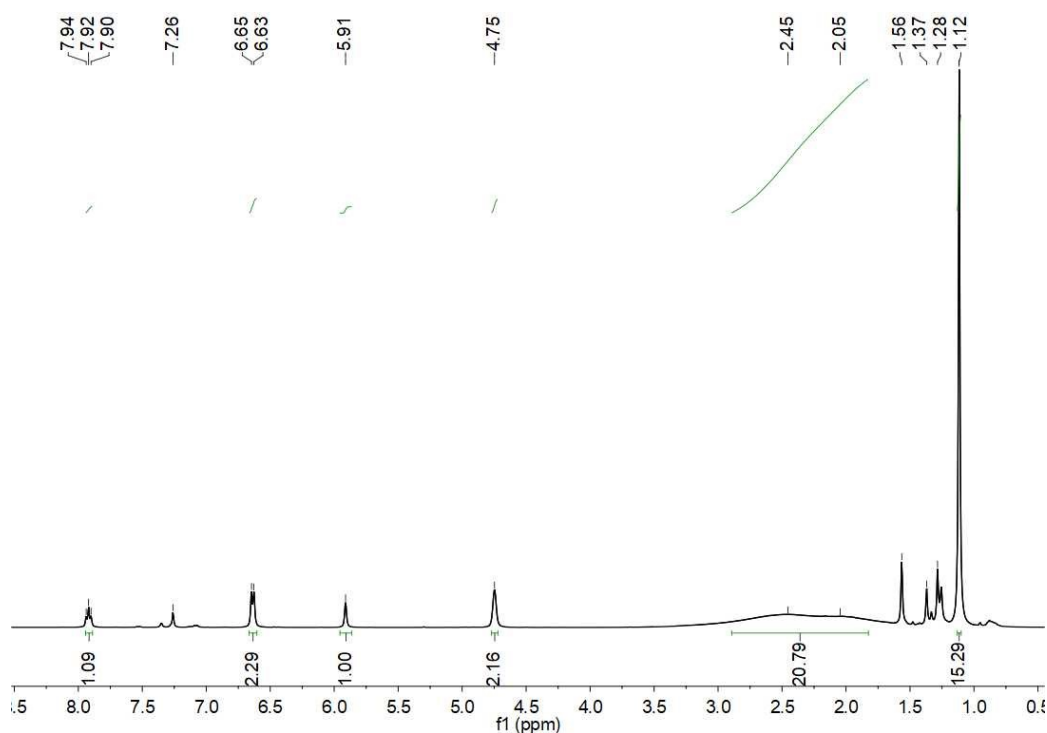

**Figure S35.**  $^1\text{H}$  NMR (400 MHz,  $\text{CDCl}_3$ , 298K, ppm) of complex **3b**.

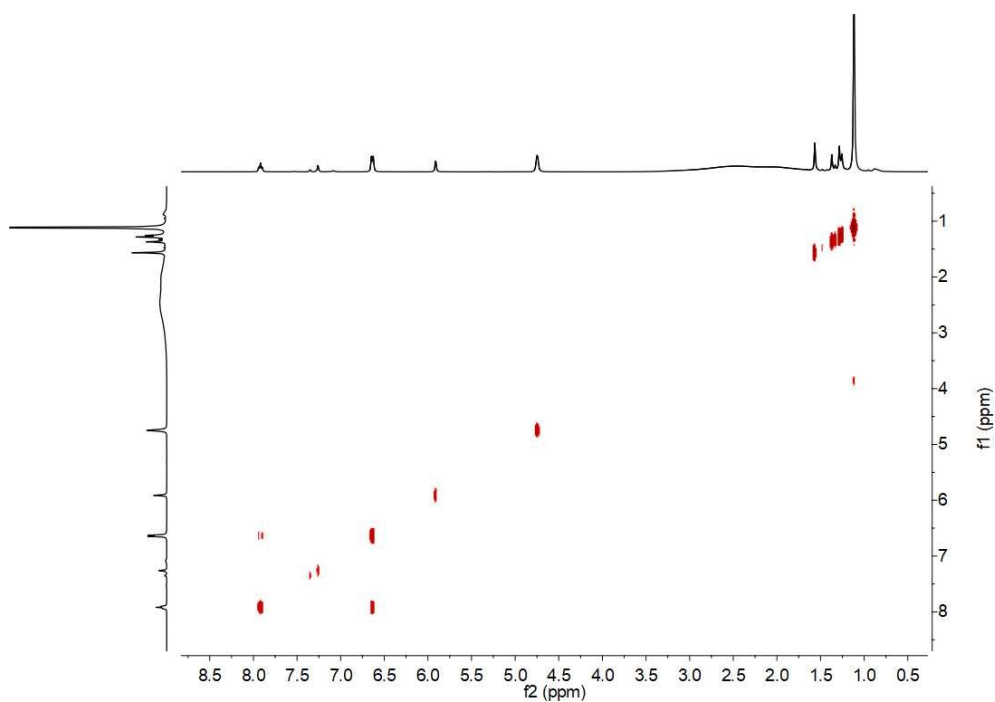

**Figure S36.**  $^1\text{H}$ - $^1\text{H}$  COSY NMR (400 MHz,  $\text{CDCl}_3$ , 298K, ppm) of complex **3b**.

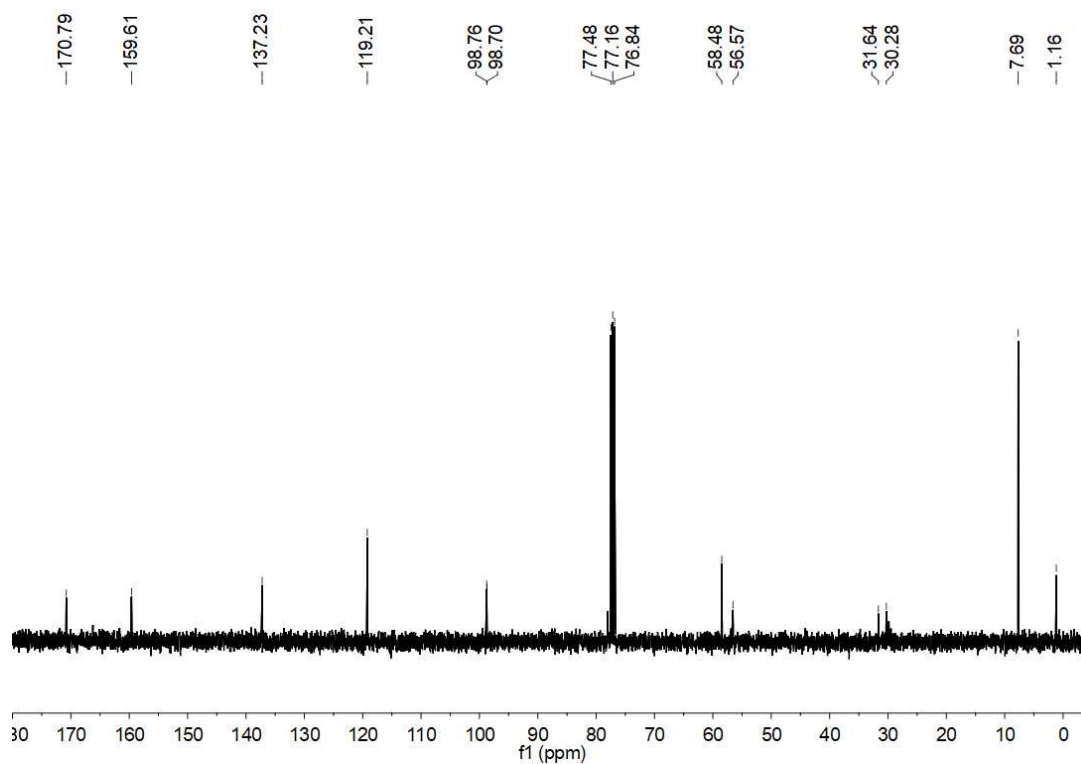

**Figure S37.**  $^{13}\text{C}\{^1\text{H}\}$  NMR (101 MHz,  $\text{CDCl}_3$ , 298K, ppm) of complex **3b**.

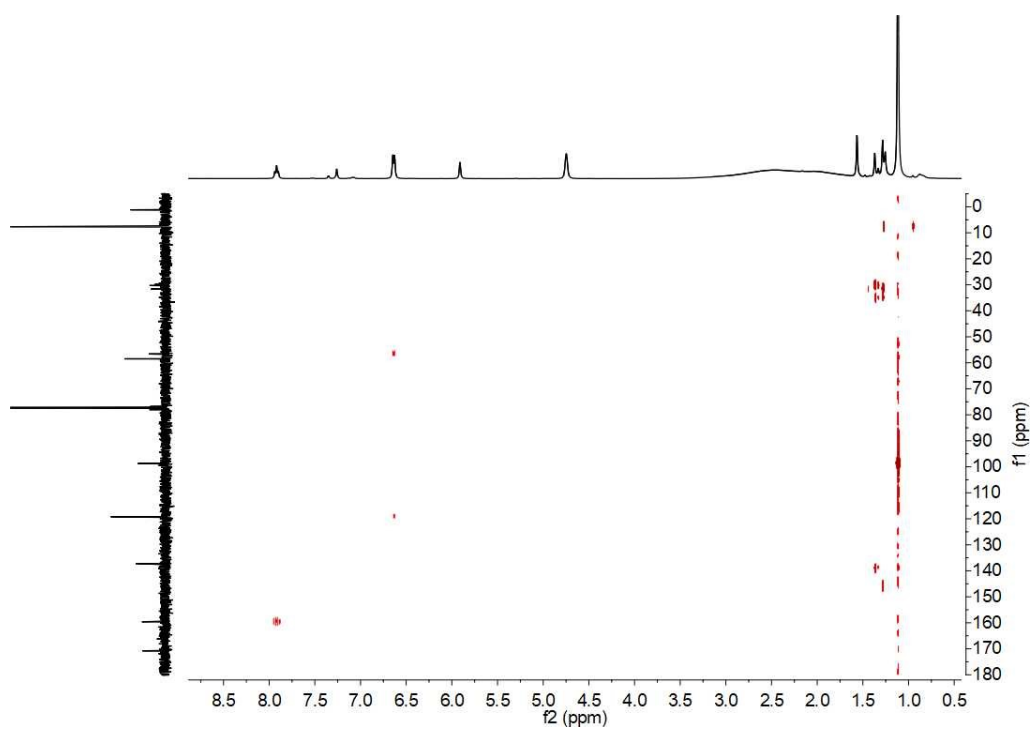

**Figure S38.** <sup>13</sup>C-<sup>1</sup>H HMBC NMR (400 MHz, CDCl<sub>3</sub>, 298K) of complex **3b**.

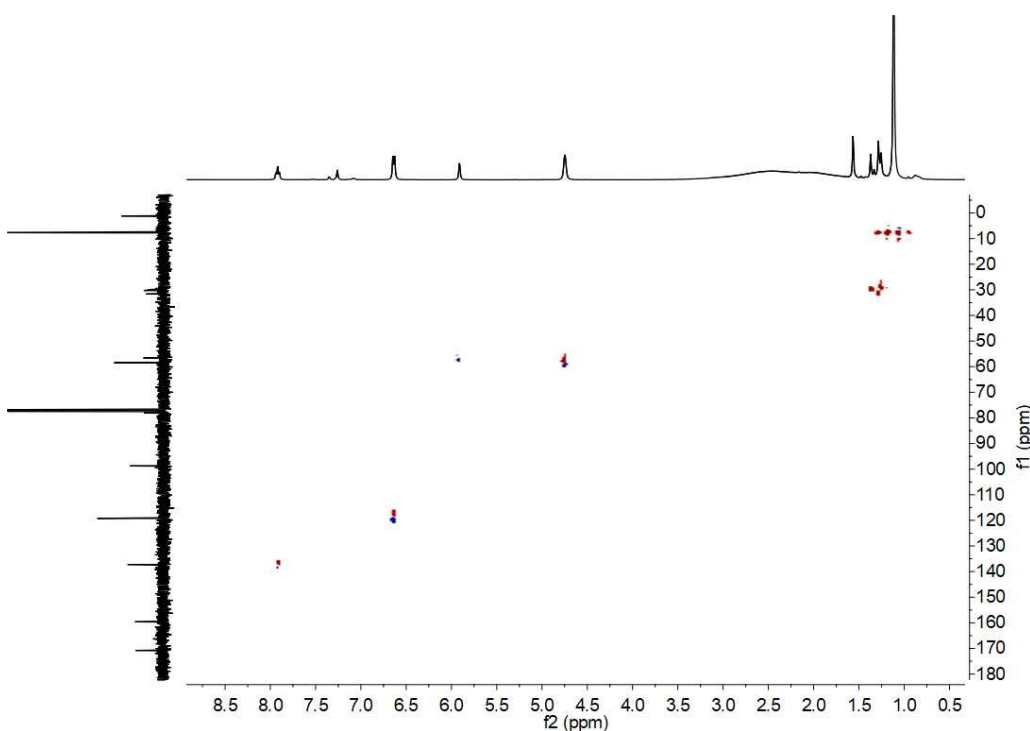

**Figure S39.** <sup>13</sup>C-<sup>1</sup>H HSQC NMR (400 MHz, CDCl<sub>3</sub>, 298K) of complex **3b**.

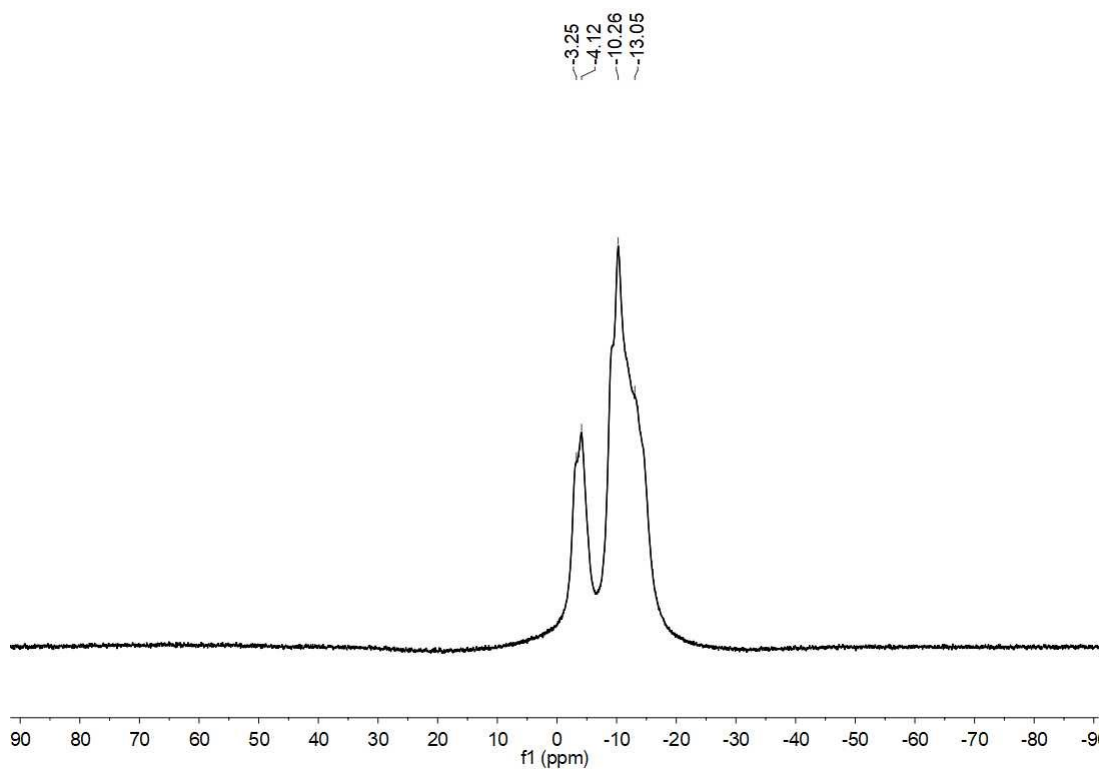

**Figure S40.**  $^{11}\text{B}$  NMR (160 MHz,  $\text{CDCl}_3$ , 298 K, ppm) of complex **3b**.

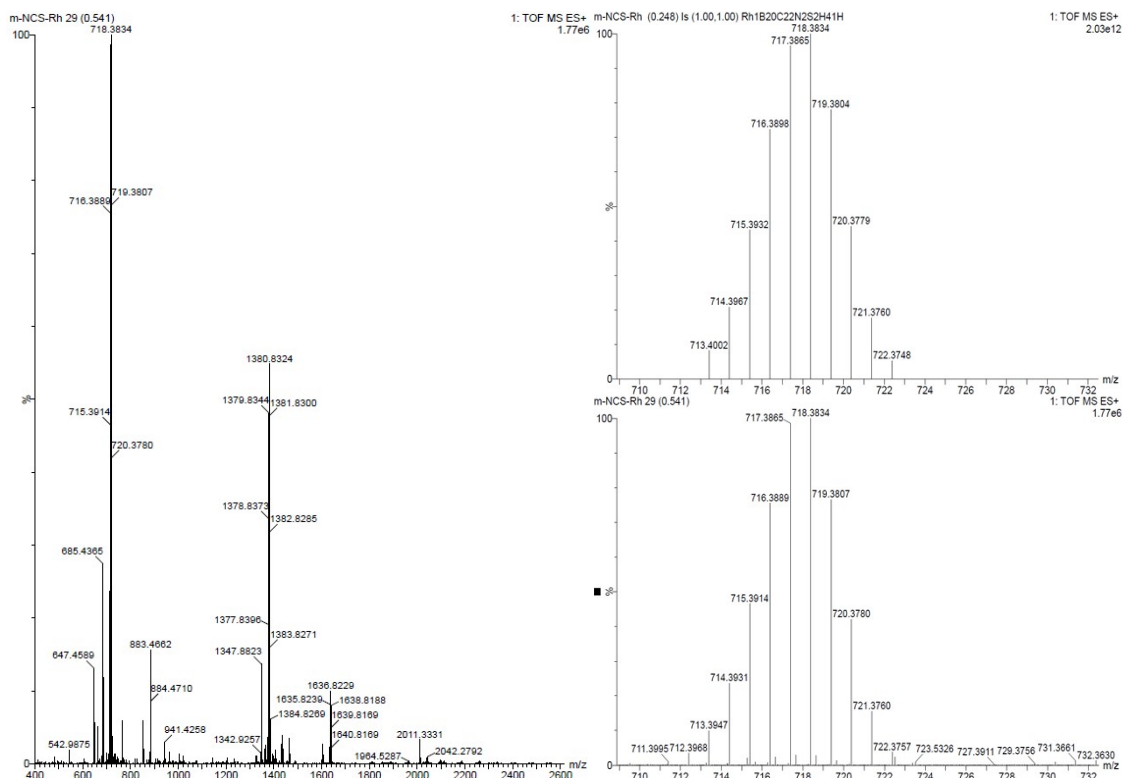

**Figure S41.** Experimental (bottom) and theoretical (top) ESI-MS of complex **3b**.

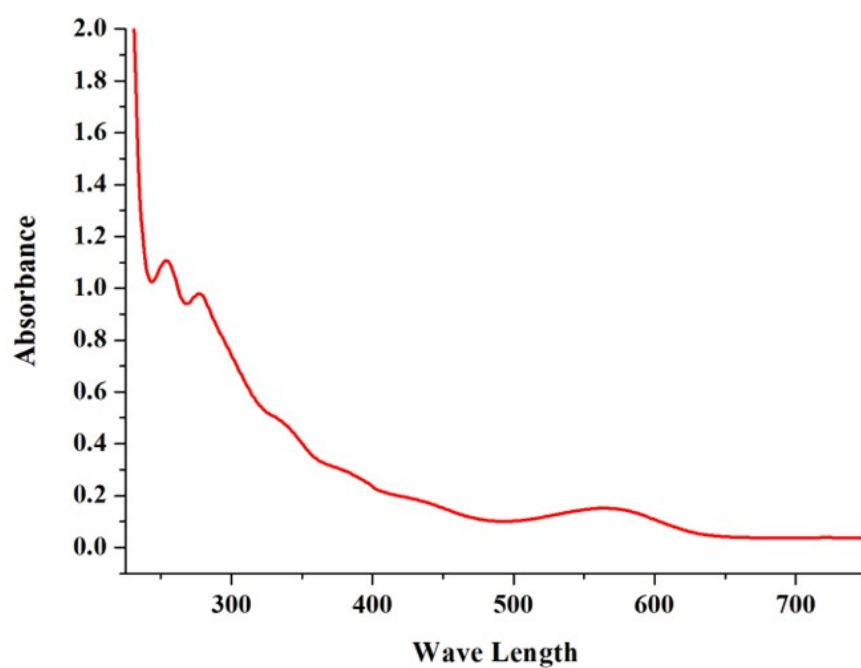

**Figure S42.** UV-visible absorption spectra of complex **3b** in dichloromethane.



## S2.7 Synthesis and Characterization of complex 4.

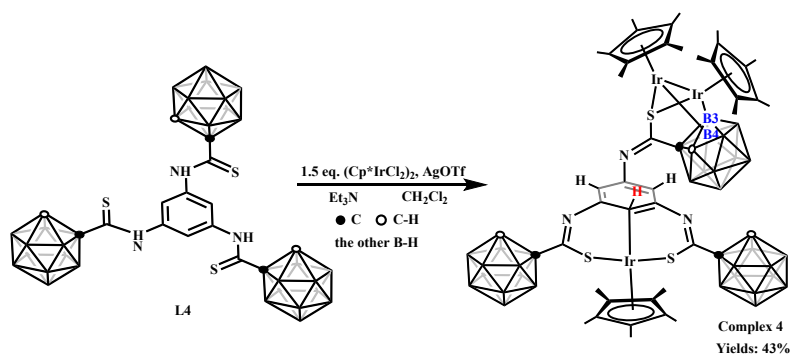

### Scheme S7. Synthesis of complex 4.

Ligand **4** (27.40 mg, 0.04 mmol), [Cp\*IrCl<sub>2</sub>]<sub>2</sub> (48.48 mg, 0.06 mmol), AgOTf (61.00 mg, 0.24 mmol) and Et<sub>3</sub>N (0.05 mL) were added to the CH<sub>2</sub>Cl<sub>2</sub> solution (10 mL) at room temperature. The reaction mixture was stirred in the dark for 18 h. Then the mixture was filtrated and the filtrate was concentrated and further purified via silica gel column chromatography (*n*-Hexane : CH<sub>2</sub>Cl<sub>2</sub>, 4 : 1). Orange solids were obtained and dried under vacuo to give the complex **4**: 28.54 mg 43%. <sup>1</sup>H NMR (400 MHz; CDCl<sub>3</sub>, 298K, ppm): δ = 2.31-2.96 (br, 28H, B-H); 1.20 (s, 15H, Cp\*-H); 2.11 (d, 30H, Cp\*-H); 4.67 (s, 3H, C<sub>cage</sub>-H); 5.57 (s, 1H, Ar-H); 5.98 (s, 1H, Ar-H); 6.04 (s, 1H, Ar-H). <sup>13</sup>C{<sup>1</sup>H} NMR (101 MHz; CDCl<sub>3</sub>, 298K, ppm): δ = 7.18, 10.41, 10.66, 91.80, 92.20, 93.49 (Cp\*-C), 58.48 (cage C); 35.04, 109.91, 128.99, 131.07 (Ar-C); 161.76, 168.12 (N=C-S). <sup>11</sup>B NMR (160 MHz, CDCl<sub>3</sub>, 298K, ppm): δ = -3.56, -9.67. IR (KBr disk, cm<sup>-1</sup>): ν = 3057.39, 2963.00, 2884.42, 2579.67, 1614.33, 1450.23, 1383.79, 1261.40, 1194.33, 1097.51, 1025.35, 803.59. ESI-MS: m/z = 1659.7423 (calcd for [M + H]<sup>+</sup> = 1659.7402).

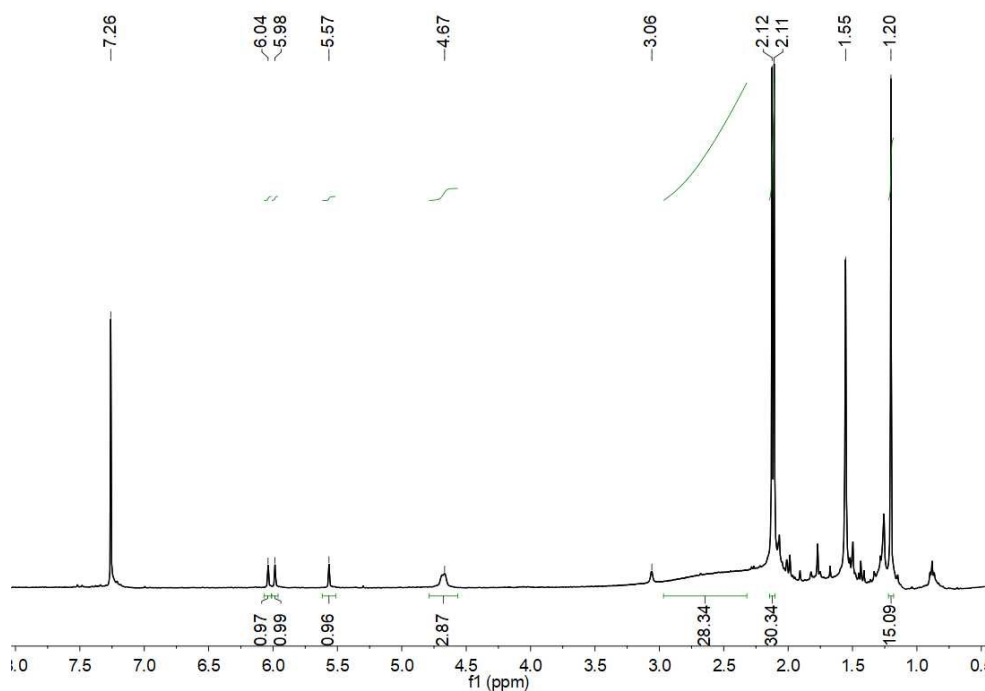

Figure S43. <sup>1</sup>H NMR (400 MHz, CDCl<sub>3</sub>, 298K, ppm) of complex **4**.

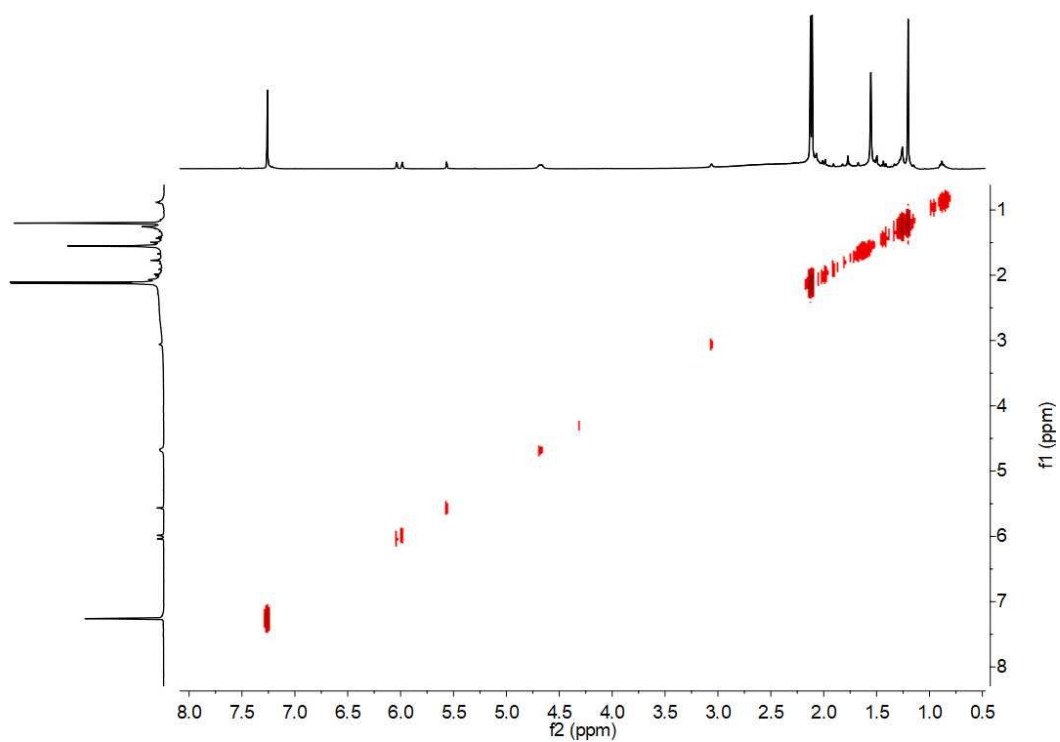

**Figure S44.**  $^1\text{H}$ - $^1\text{H}$  COSY NMR (400 MHz,  $\text{CDCl}_3$ , 298K, ppm) of complex **4**.

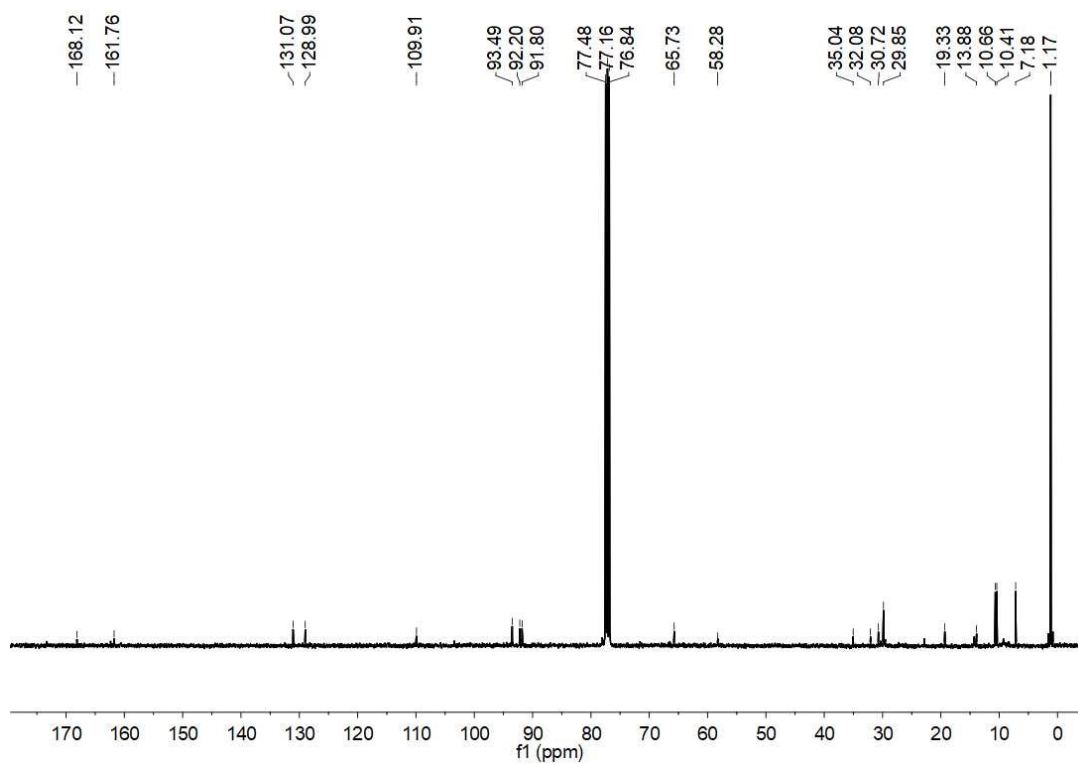

**Figure S45.**  $^{13}\text{C}\{^1\text{H}\}$  NMR (101 MHz,  $\text{CDCl}_3$ , 298K, ppm) of complex **4**.

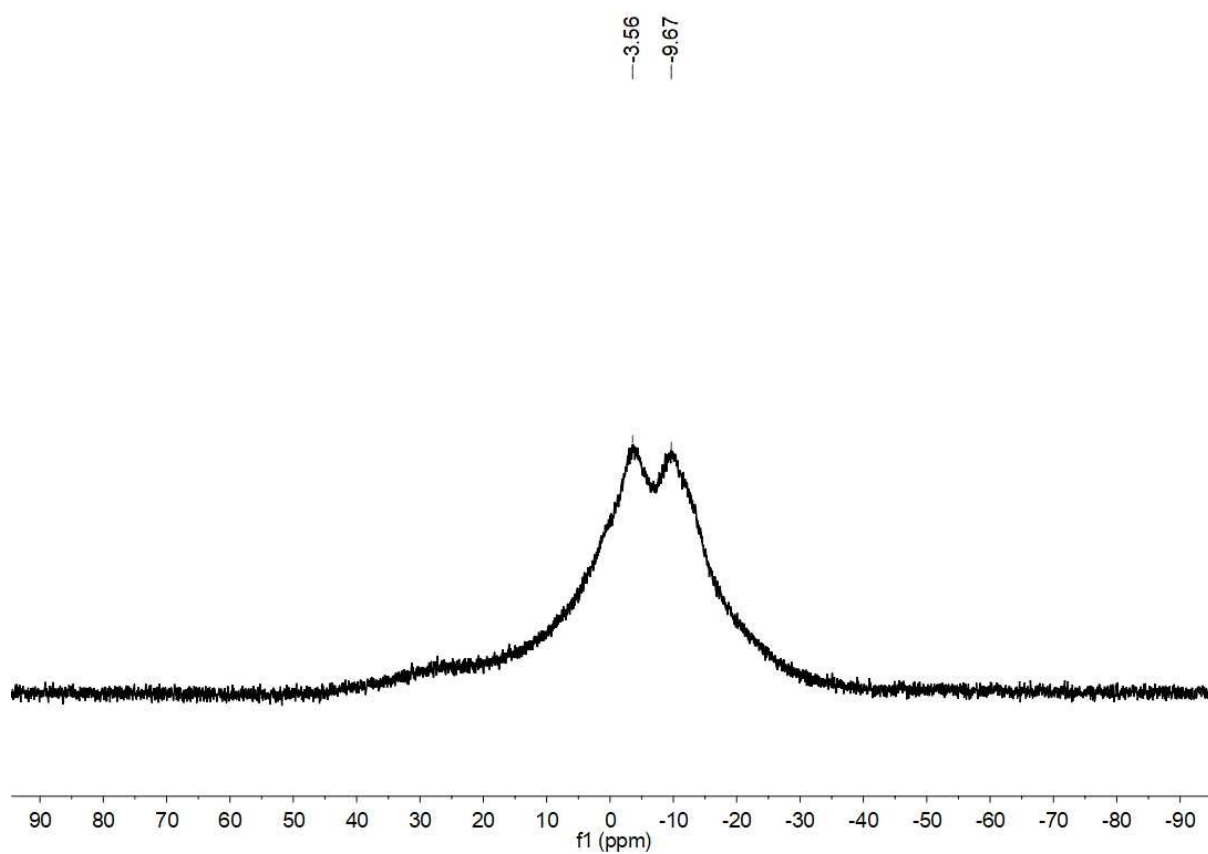

**Figure S46.**  $^{11}\text{B}$  NMR (160 MHz,  $\text{CDCl}_3$ , 298 K, ppm) of complex 4.

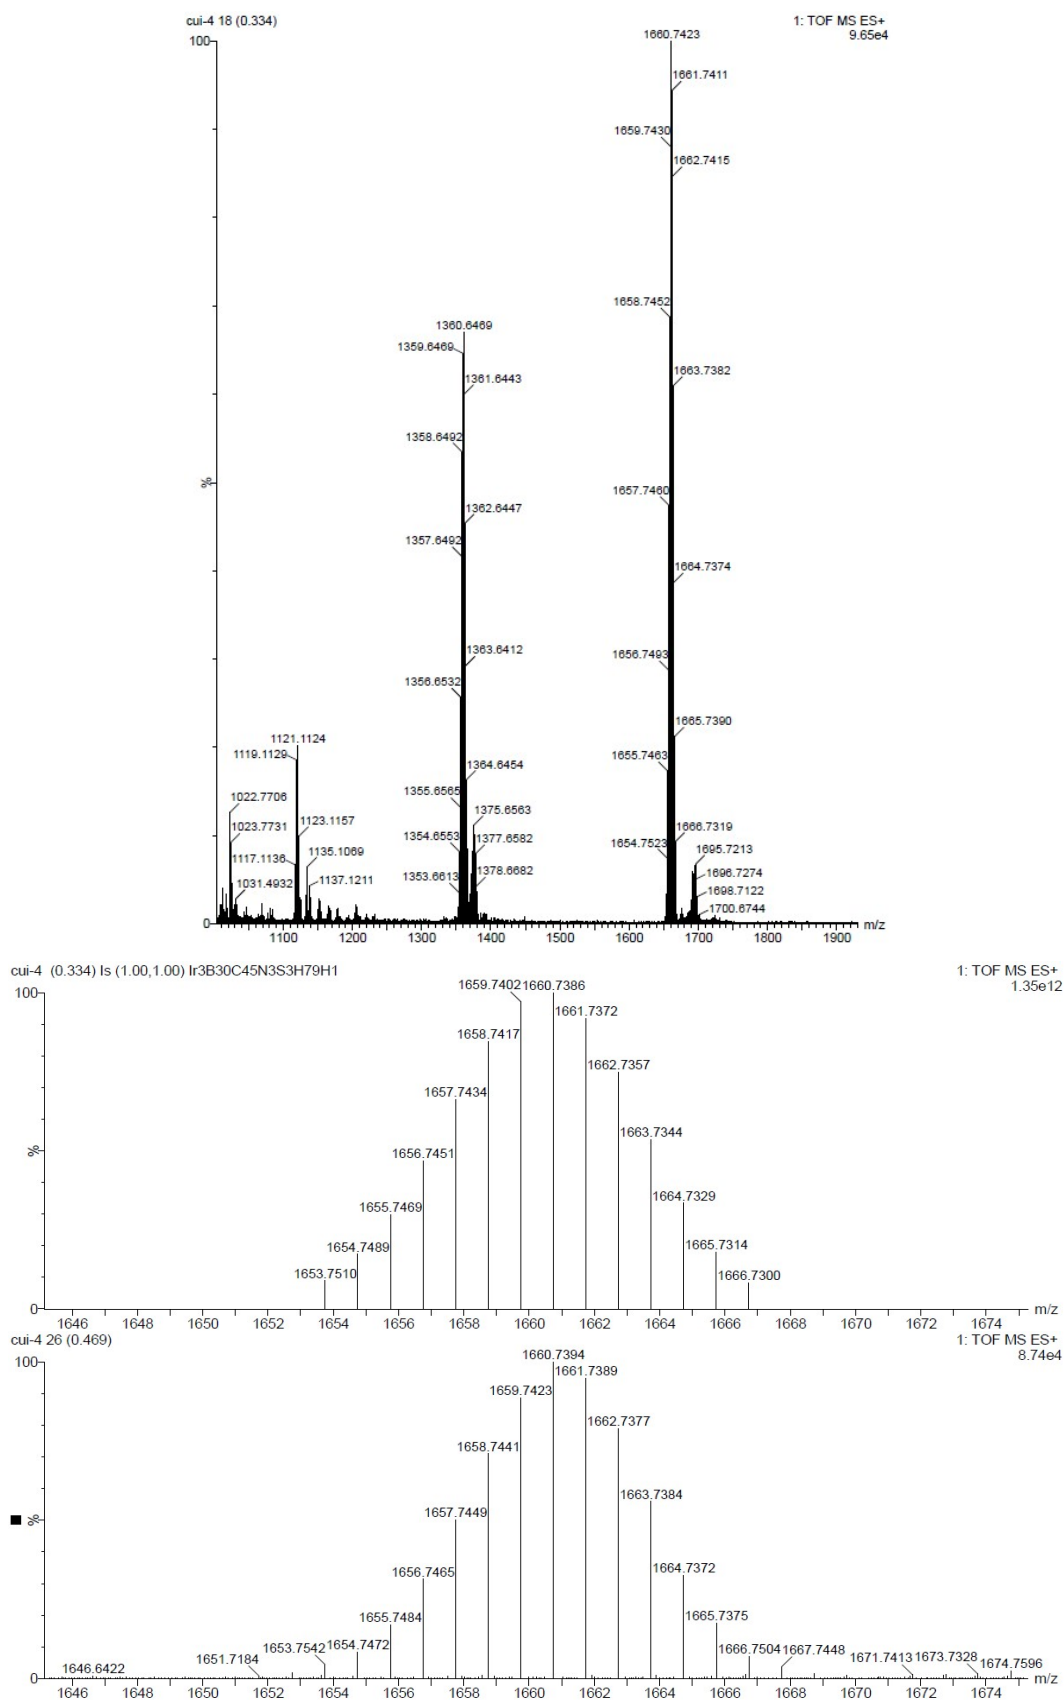

Figure S47. Experimental (bottom) and theoretical (top) ESI-MS of complex 4.

## S2.8 Synthesis and Characterization of complex 5a.

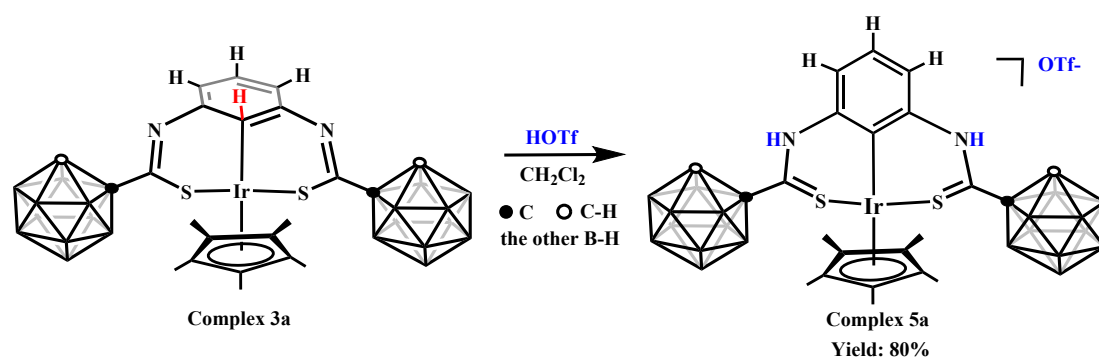

### Scheme S8. Synthesis of complex 5a.

The complex **3a** (40.31 mg, 0.05 mmol) was dissolved in the CH<sub>2</sub>Cl<sub>2</sub> solution. And HOTf (0.05 mL) was added to the solution at room temperature. The reaction mixture was stirred 10 h. Then the mixture was filtered and the precipitate was washed by Et<sub>2</sub>O. Orange solid was obtained and dried under vacuo to give the complex **5a**: 38.25 mg 80%. <sup>1</sup>H NMR (400 MHz; CD<sub>3</sub>OD, 298K, ppm): 1.53, 1.58, 1.59 (s, 15H, Cp\*-H); 2.89 (s, 2H, C<sub>cage</sub>-H); 6.78 (s, 3H, Ar-H). <sup>13</sup>C{<sup>1</sup>H} NMR (101 MHz; CD<sub>3</sub>OD, 298K, ppm): δ = 8.14, 94.24 (Cp\*-C); 108.35, 117.48, 125.84, 144.52 (Ar-C); 199.14 (N-C=S). <sup>11</sup>B NMR (160 MHz, CD<sub>3</sub>OD, 298K, ppm): δ = 18.33, -9.07, -16.49, -21.65, -31.21, -32.25, -34.46, -35.42. IR (KBr disk, cm<sup>-1</sup>): ν = 3448.31, 3063.61, 2874.62, 2588.29, 2346.60, 1613.09, 1424.81, 1357.23, 1284.95, 1243.76, 1170.70, 1029.78, 639.90. ESI-MS: m/z = 807.4139 (calcd for [M - OTf]<sup>+</sup> = 807.4511).

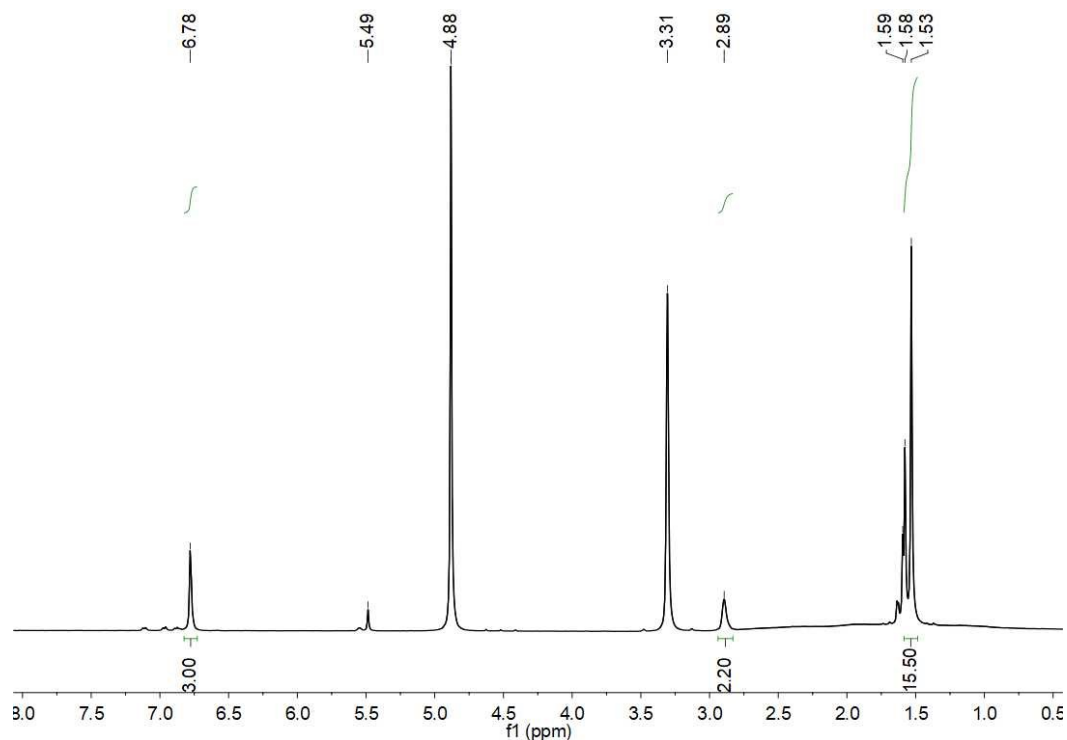

Figure S48. <sup>1</sup>H NMR (400 MHz, CD<sub>3</sub>OD, 298K, ppm) of complex 5a.

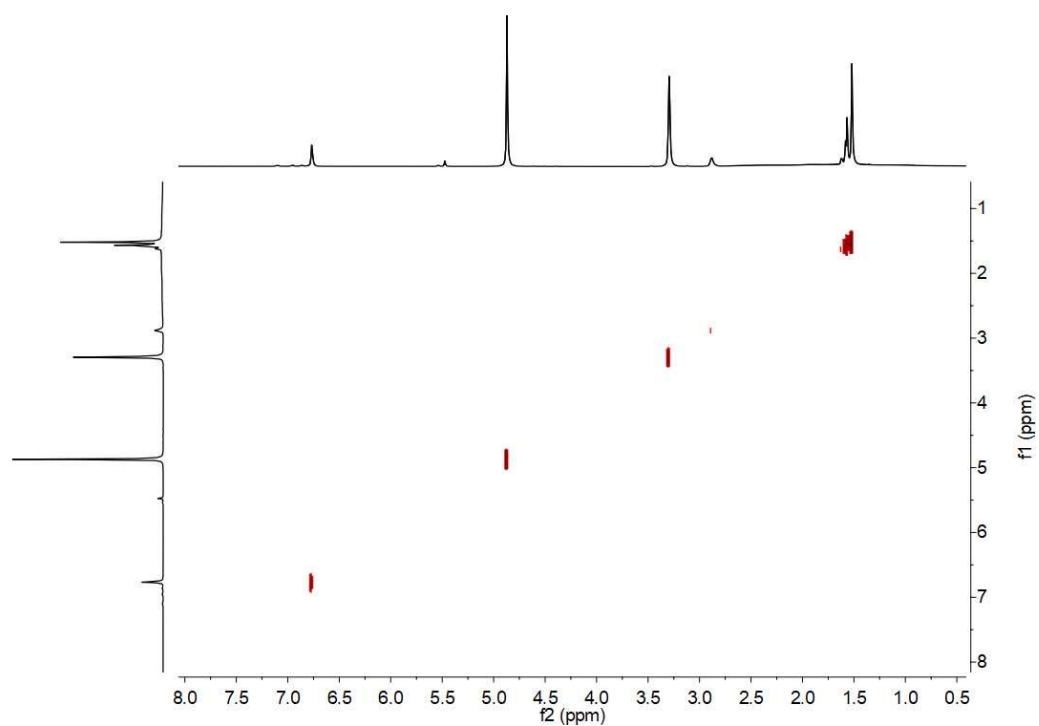

Figure S49.  $^1\text{H}$ - $^1\text{H}$  COSY NMR (400 MHz,  $\text{CD}_3\text{OD}$ , 298K, ppm) of complex **5a**.

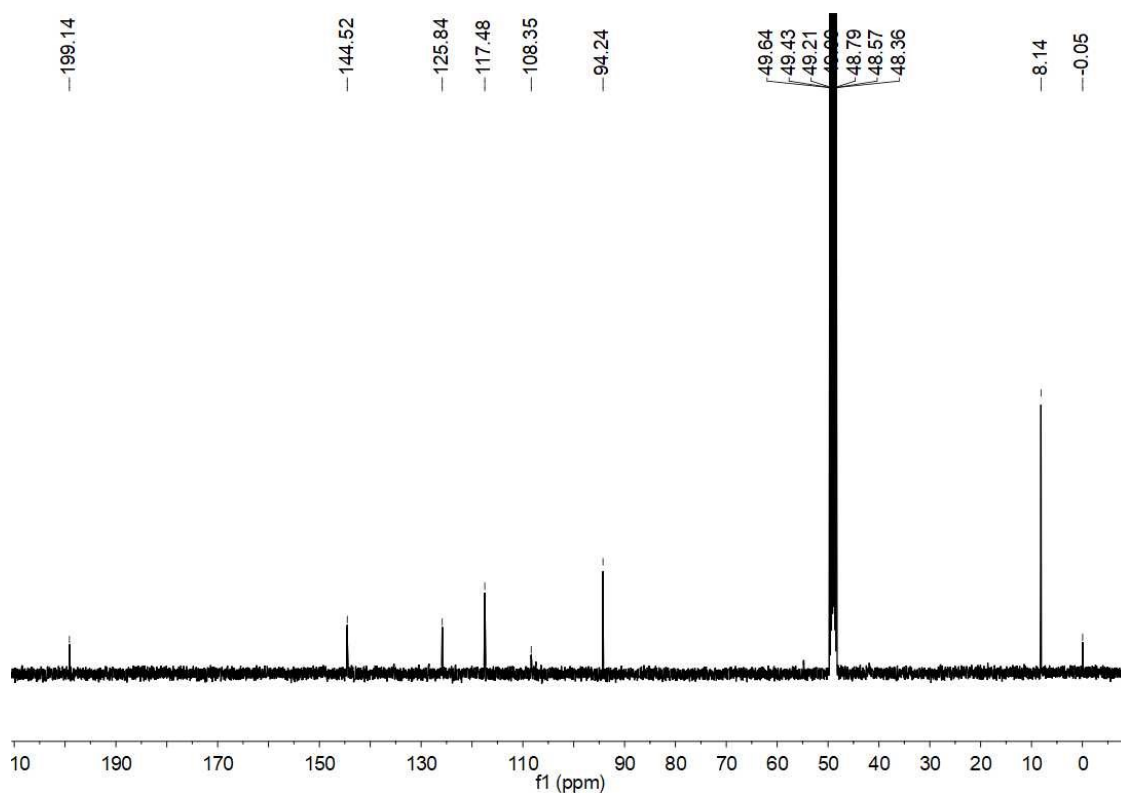

Figure S50.  $^{13}\text{C}\{^1\text{H}\}$  NMR (101 MHz,  $\text{CD}_3\text{OD}$ , 298K, ppm) of complex **5a**.

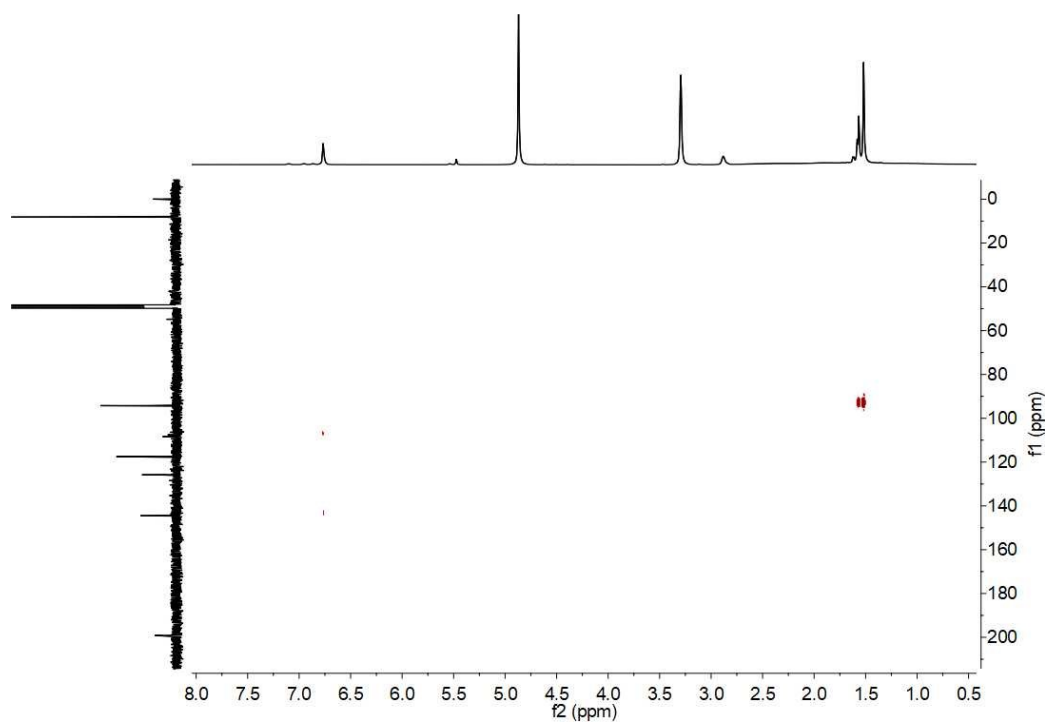

Figure S51.  $^{13}\text{C}$ - $^1\text{H}$  HMBC NMR (400 MHz,  $\text{CD}_3\text{OD}$ , 298K) of complex **5a**.

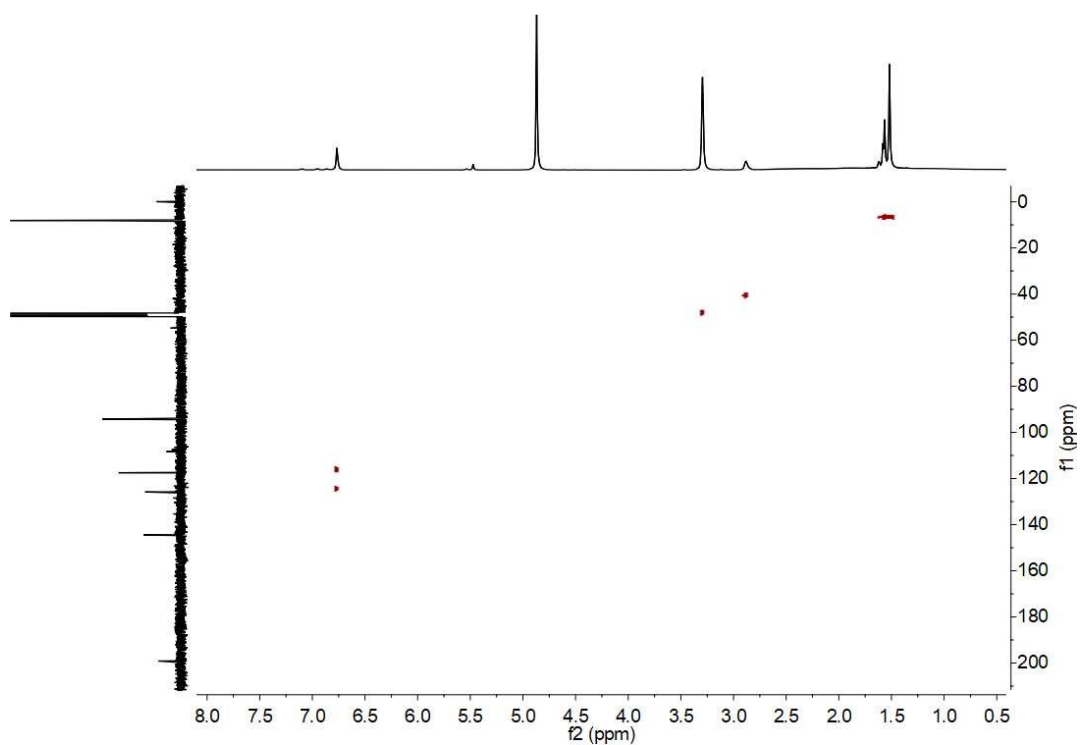

Figure S52.  $^{13}\text{C}$ - $^1\text{H}$  HSQC NMR (400 MHz,  $\text{CD}_3\text{OD}$ , 298K) of complex **5a**.

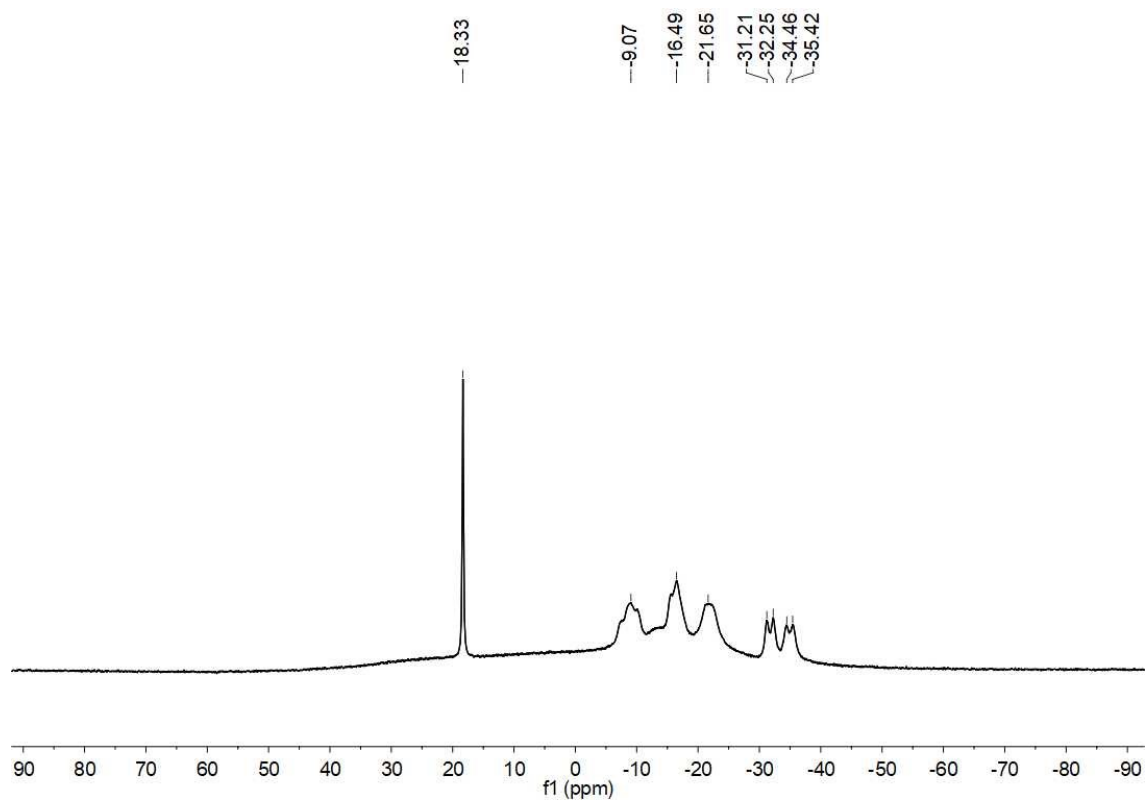

**Figure S53.**  $^{11}\text{B}$  NMR (160 MHz,  $\text{CD}_3\text{OD}$ , 298 K, ppm) of complex **5a**.

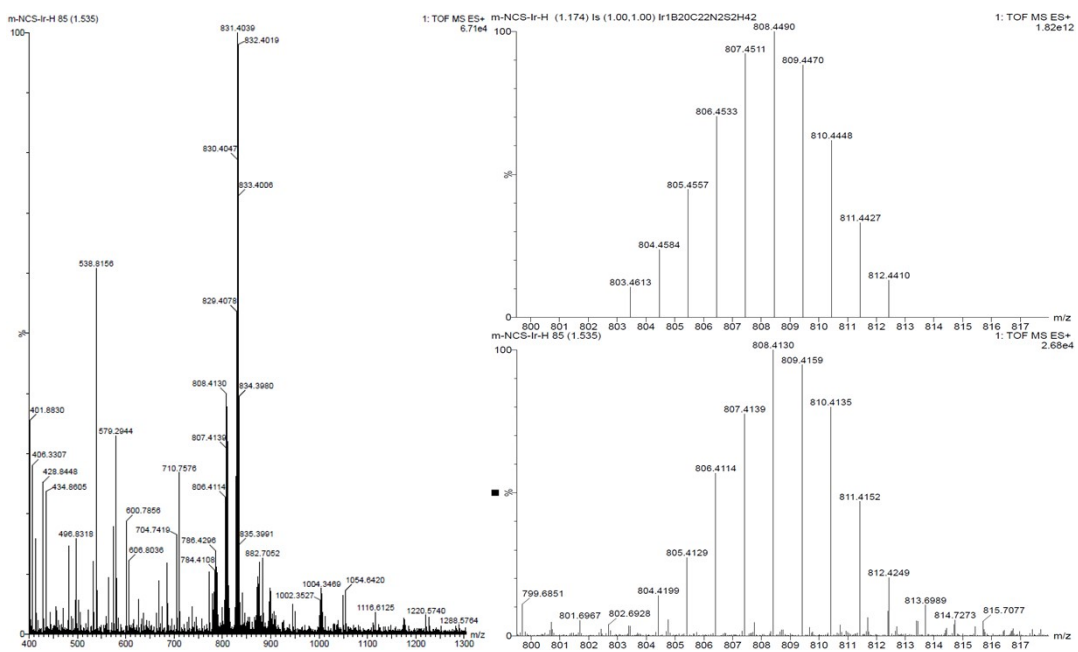

**Figure S54.** Experimental (bottom) and theoretical (top) ESI-MS of complex **5a**.



## S2.9 Synthesis and Characterization of complex **5b**.

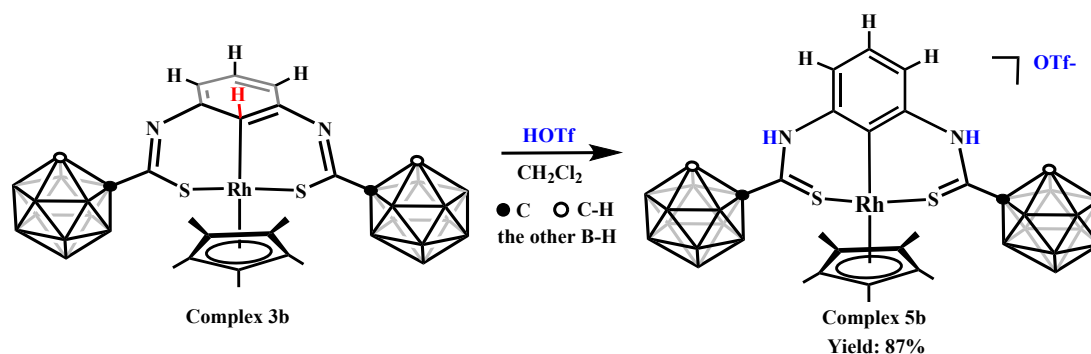

### Scheme S9. Synthesis of complex **5b**.

Complex **3b** (35.84 mg, 0.05 mmol) was dissolved in the CH<sub>2</sub>Cl<sub>2</sub> solution. And HOTf (0.05 mL) was added to the solution at room temperature. The reaction mixture was stirred 6 h. Then the mixture was filtered and the precipitate was washed by Et<sub>2</sub>O. Orange solid was obtained and dried under vacuo to give the complex **5b**: 37.71 mg 87%. <sup>1</sup>H NMR (400 MHz; CD<sub>3</sub>OD, 298K, ppm): 1.47, 1.52 (s, 15H, Cp<sup>\*</sup>-H); 2.96 (s, 2H, C<sub>cage</sub>-H); 6.90, 6.92, 6.95, 6.96 (3H, Ar-H). <sup>11</sup>B NMR (160 MHz, CD<sub>3</sub>OD, 298K, ppm): δ = 18.33, -7.54, -9.07, -16.43, -21.88, -31.23, -32.19, -34.31, -35.42. IR (KBr disk, cm<sup>-1</sup>): ν = 3448.41, 3222.36, 3060.20, 2916.95, 2586.59, 1554.33, 1421.83, 1283.98, 1243.38, 1170.27, 1029.34, 636.71. ESI-MS: m/z = 718.3762 (calcd for [M - OTf]<sup>+</sup> = 718.3943).

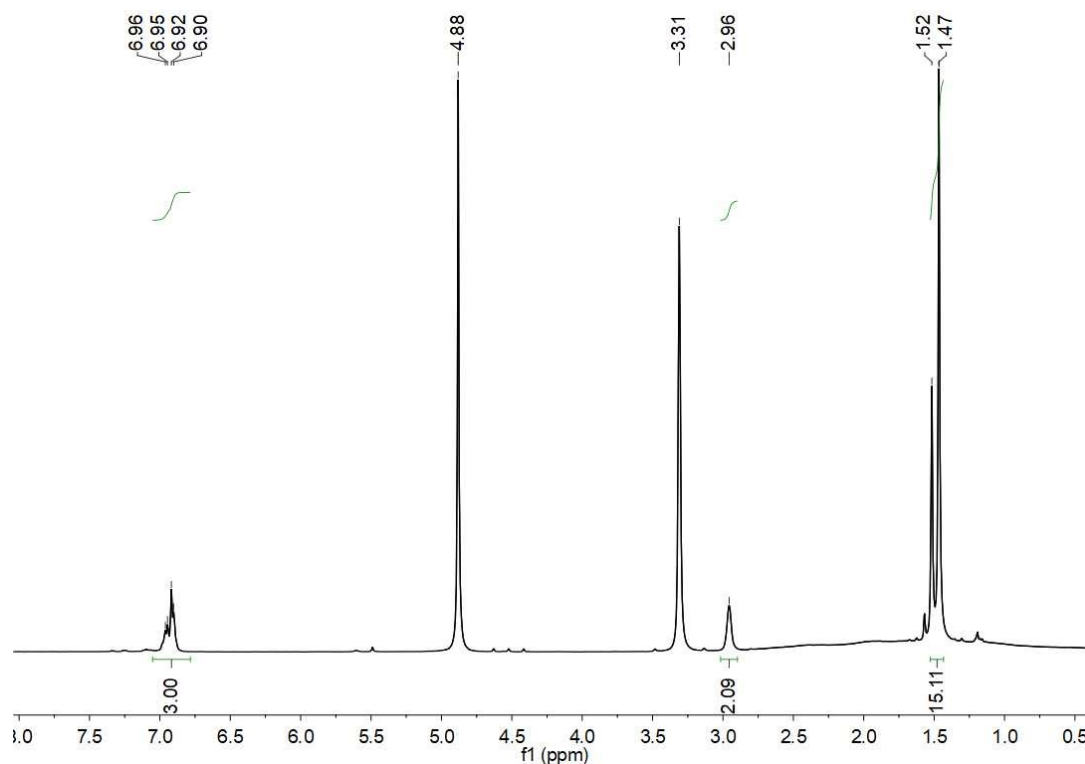

Figure S55. <sup>1</sup>H NMR (400 MHz, CD<sub>3</sub>OD, 298K, ppm) of complex **5b**.

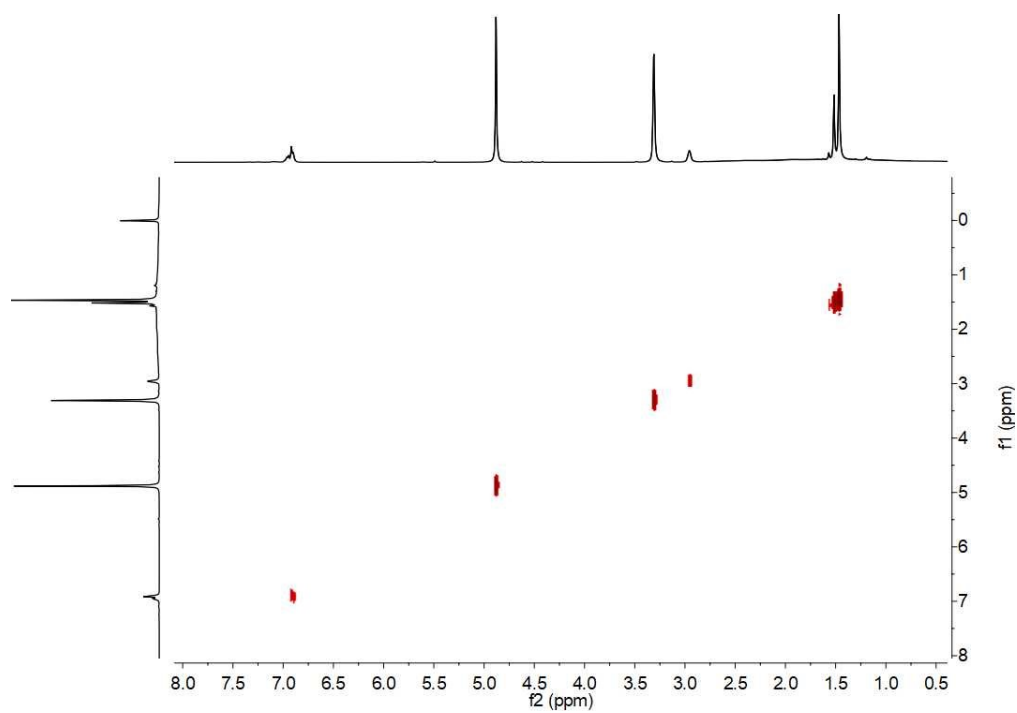

**Figure S56.**  $^1\text{H}$ - $^1\text{H}$  COSY NMR (400 MHz,  $\text{CD}_3\text{OD}$ , 298K, ppm) of complex **5b**.

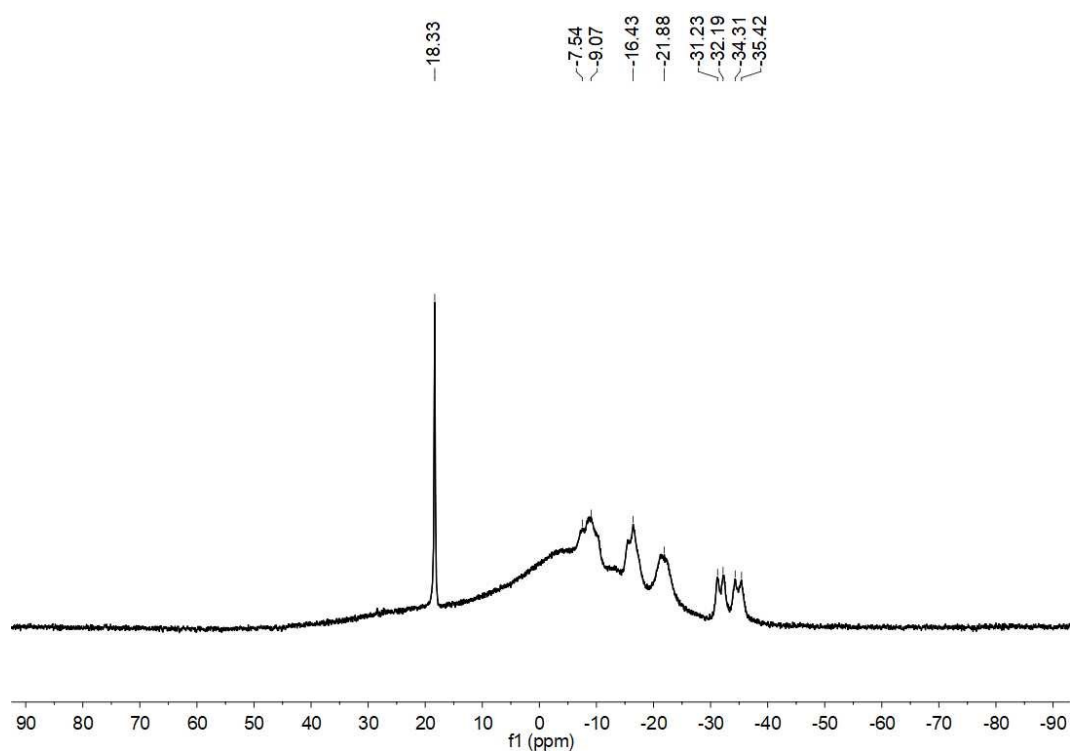

**Figure S57.**  $^{11}\text{B}$  NMR (160 MHz,  $\text{CD}_3\text{OD}$ , 298 K, ppm) of complex **5b**.

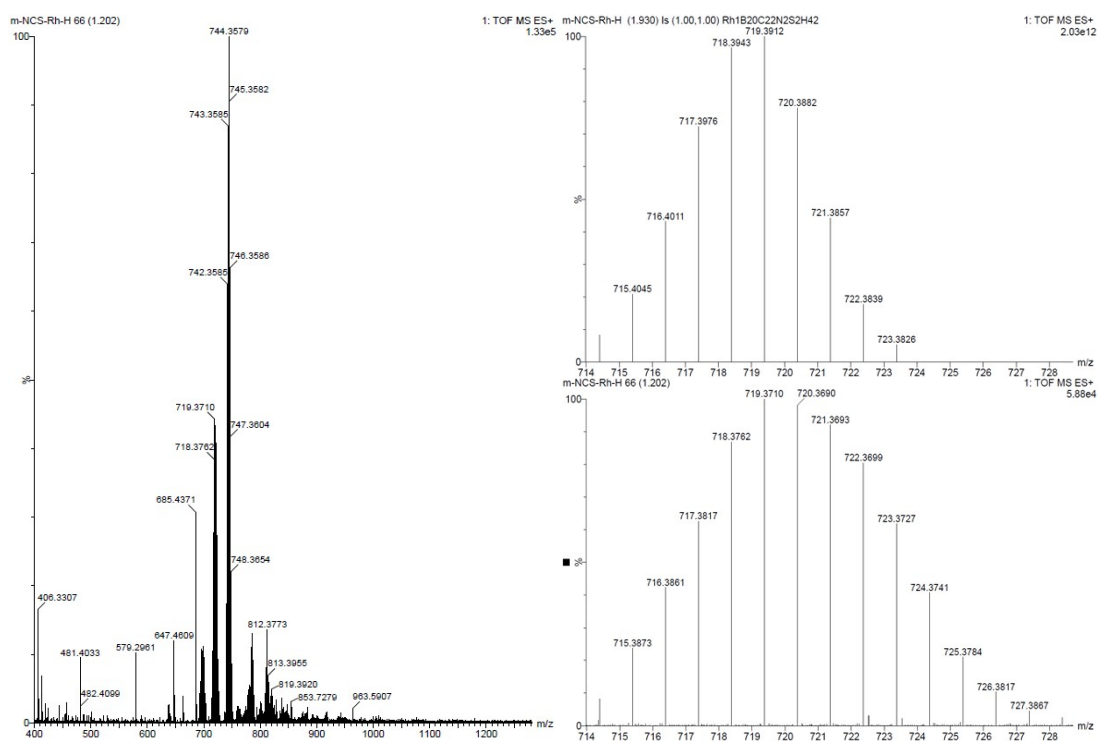

**Figure S58.** Experimental (bottom) and theoretical (top) ESI-MS of complex **5b**.

## S2.10 Synthesis and Characterization of complex 6.

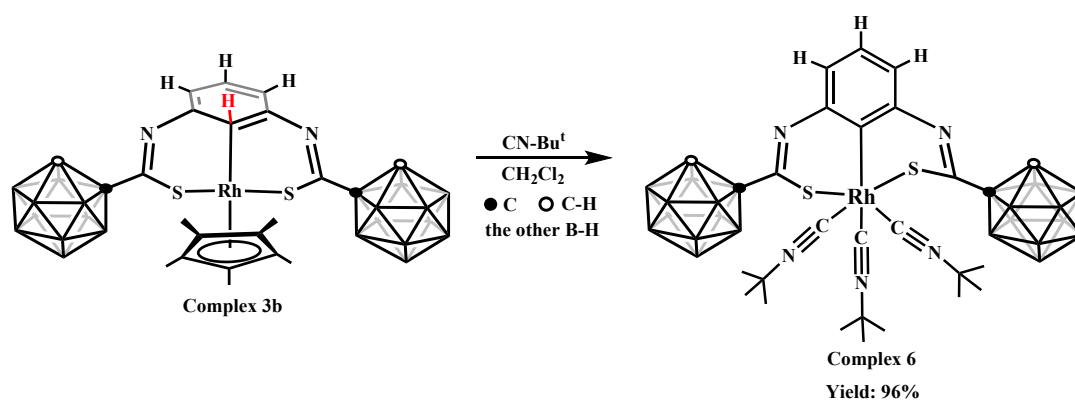

### Scheme S10. Synthesis of complex 6.

Complex **3b** (35.84 mg, 0.05 mmol) was dissolved in the  $\text{CH}_2\text{Cl}_2$  solution. And tert-Butyl isocyanide (0.05 mL) was added to the solution at room temperature. The reaction mixture was stirred 10 h. Then the mixture was concentrated and further purified via silica gel column chromatography (n-Hexane :  $\text{CH}_2\text{Cl}_2$ , 2 : 1). Yellow solids were obtained and dried under vacuo to give the complex **6**: 39.80 mg 96%.  $^1\text{H}$  NMR (400 MHz;  $\text{CDCl}_3$ , 298K, ppm):  $\delta$  = 1.83-2.82 (br, 20H, B-H); 1.39 (s, 18H,  $\text{CH}_3$ ); 1.60 (s, 9H,  $\text{CH}_3$ ); 4.86 (s, 2H,  $\text{C}_{\text{cage}}\text{-H}$ ); 7.02 (s, 3H, Ar-H).  $^{13}\text{C}\{^1\text{H}\}$  NMR (101 MHz;  $\text{CDCl}_3$ , 298K, ppm):  $\delta$  = 30.22 ( $\text{CH}_3$ ); 58.77 ( $\text{C}(\text{-CH}_3)_3$ ); 79.97 (CN); 58.00 (cage C); 125.24, 125.88, 149.40 (Ar-C); 157.81 (N=C-S).  $^{11}\text{B}$  NMR (160 MHz,  $\text{CDCl}_3$ , 298K, ppm):  $\delta$  = -3.42, -4.28, -9.66, -10.73. IR (KBr disk,  $\text{cm}^{-1}$ ):  $\nu$  = 2963.44, 2925.99, 2855.17, 2592.56, 2199.45, 2161.92, 1493.50, 1261.85, 1186.51, 1096.74, 1019.22, 800.03. ESI-MS:  $m/z$  = 830.4823 (calcd for  $[\text{M} + \text{H}]^+ = 830.4821$ ).

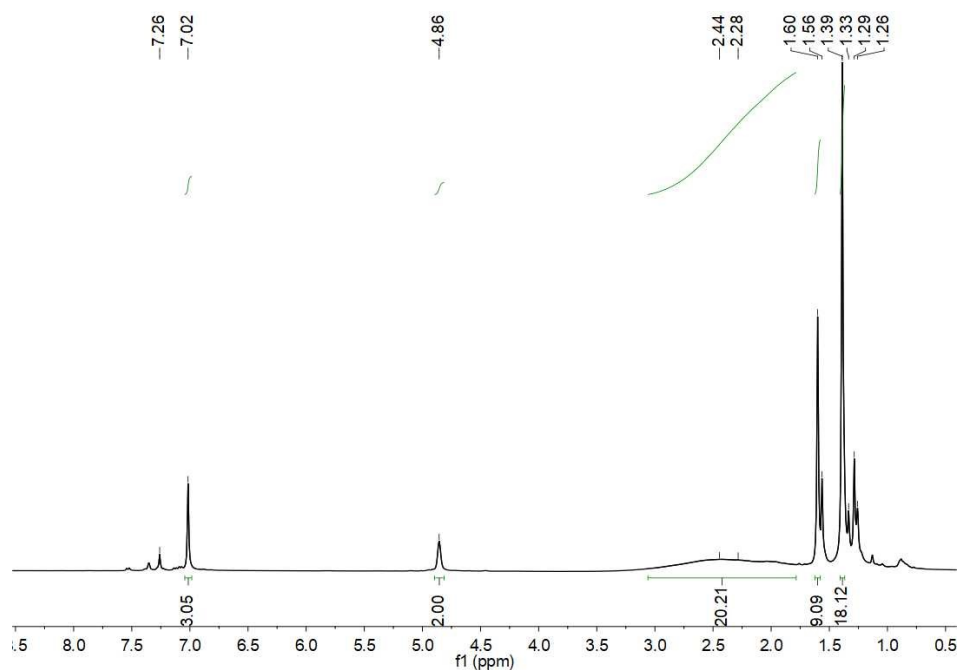

**Figure S59.**  $^1\text{H}$  NMR (400 MHz,  $\text{CDCl}_3$ , 298K, ppm) of complex **6**.

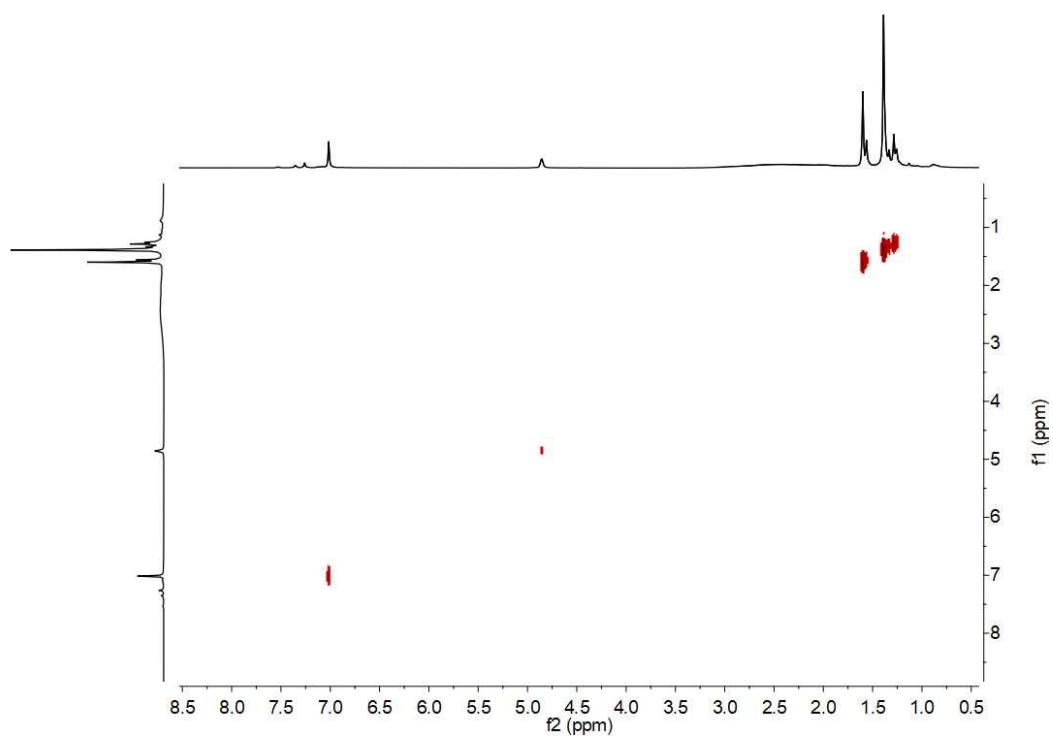

**Figure S60.**  $^1\text{H}$ - $^1\text{H}$  COSY NMR (400 MHz,  $\text{CDCl}_3$ , 298K, ppm) of complex **6**.

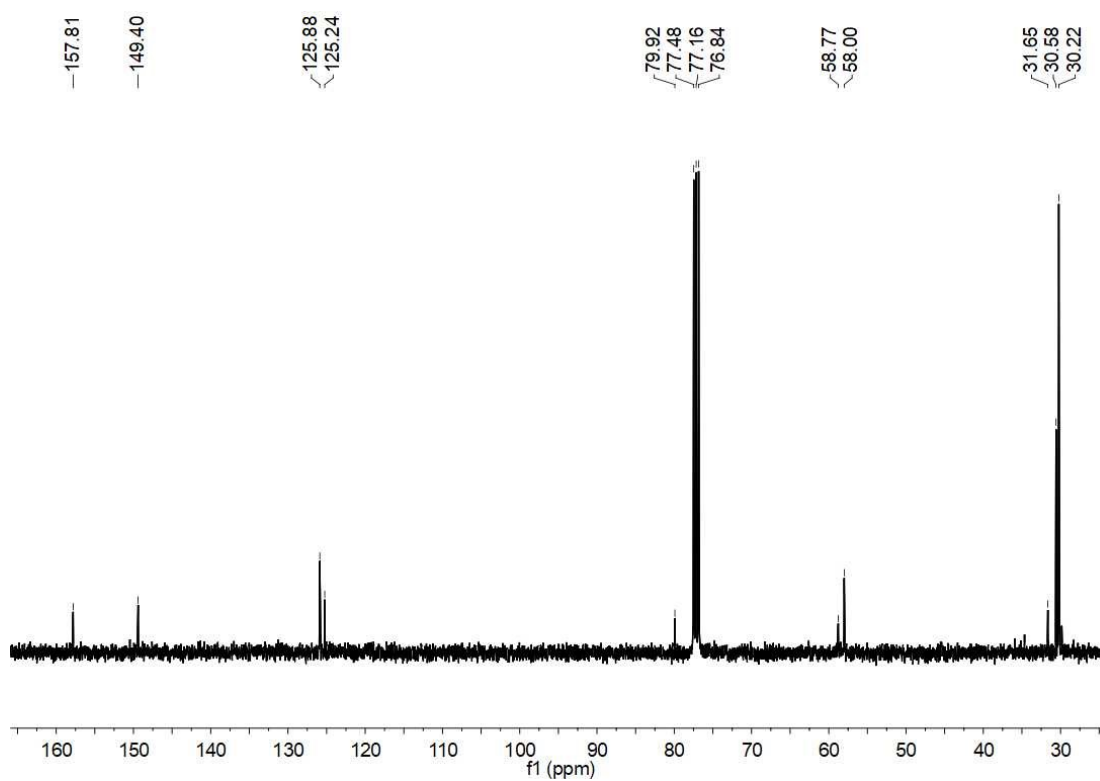

**Figure S61.**  $^{13}\text{C}\{^1\text{H}\}$  NMR (101 MHz,  $\text{CDCl}_3$ , 298K, ppm) of complex **6**.

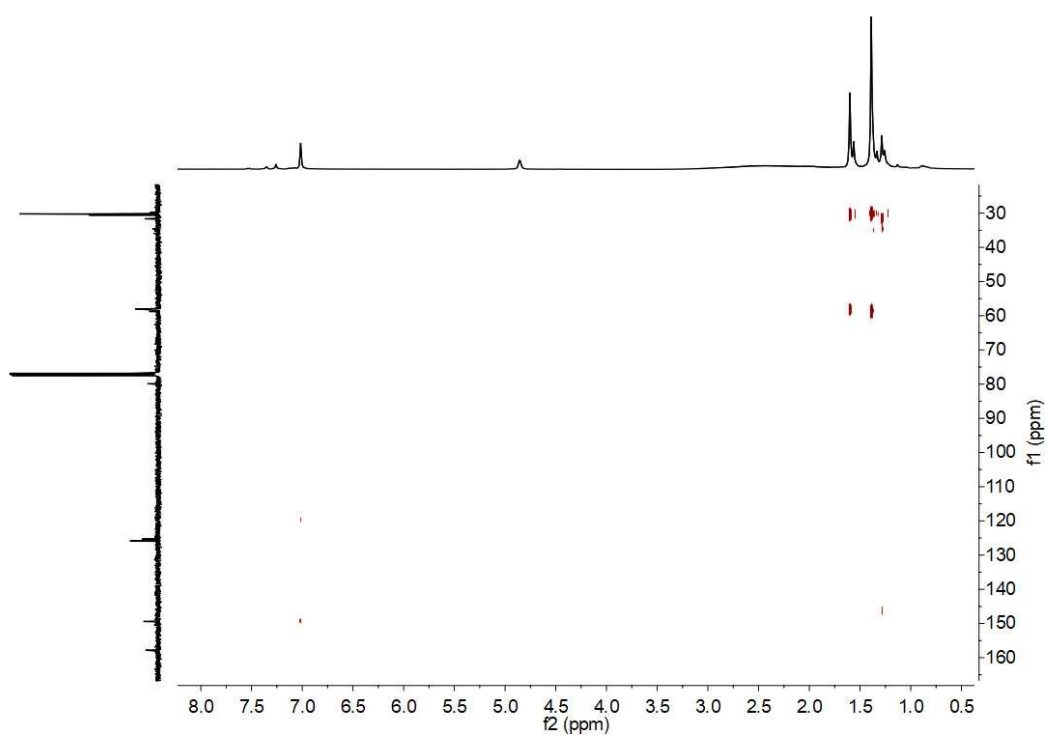

**Figure S62.** <sup>13</sup>C-<sup>1</sup>H HMBC NMR (400 MHz, CDCl<sub>3</sub>, 298K) of complex **6**.

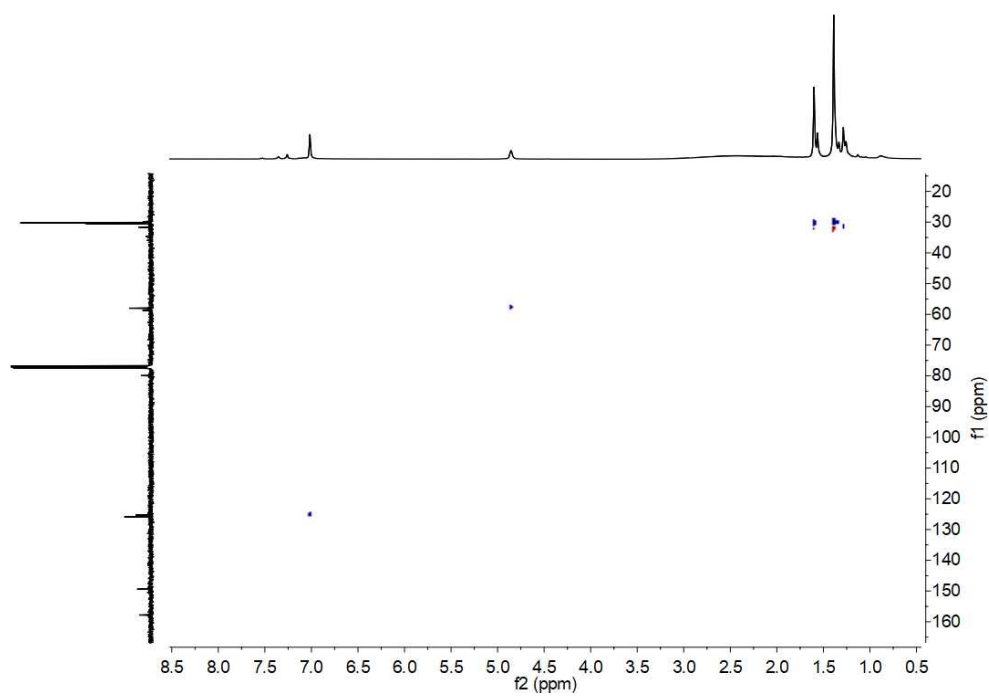

**Figure S63.** <sup>13</sup>C-<sup>1</sup>H HSQC NMR (400 MHz, CDCl<sub>3</sub>, 298K) of complex **6**.

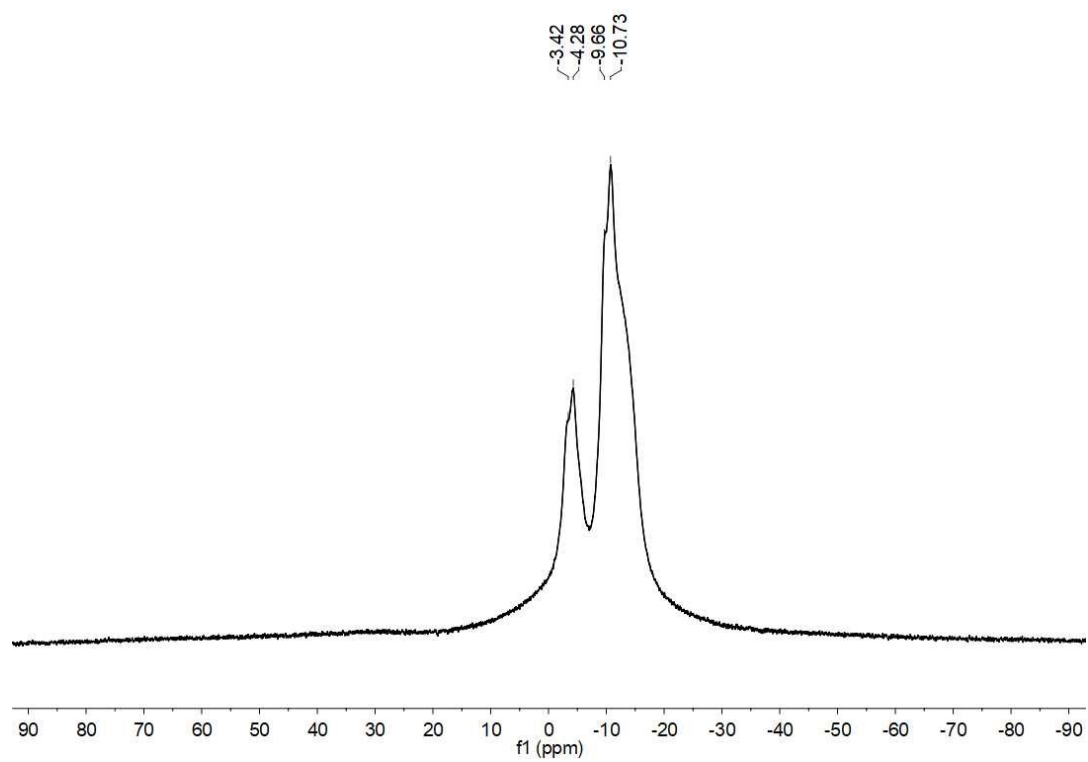

**Figure S64.**  $^{11}\text{B}$  NMR (160 MHz,  $\text{CDCl}_3$ , 298 K, ppm) of complex **6**.

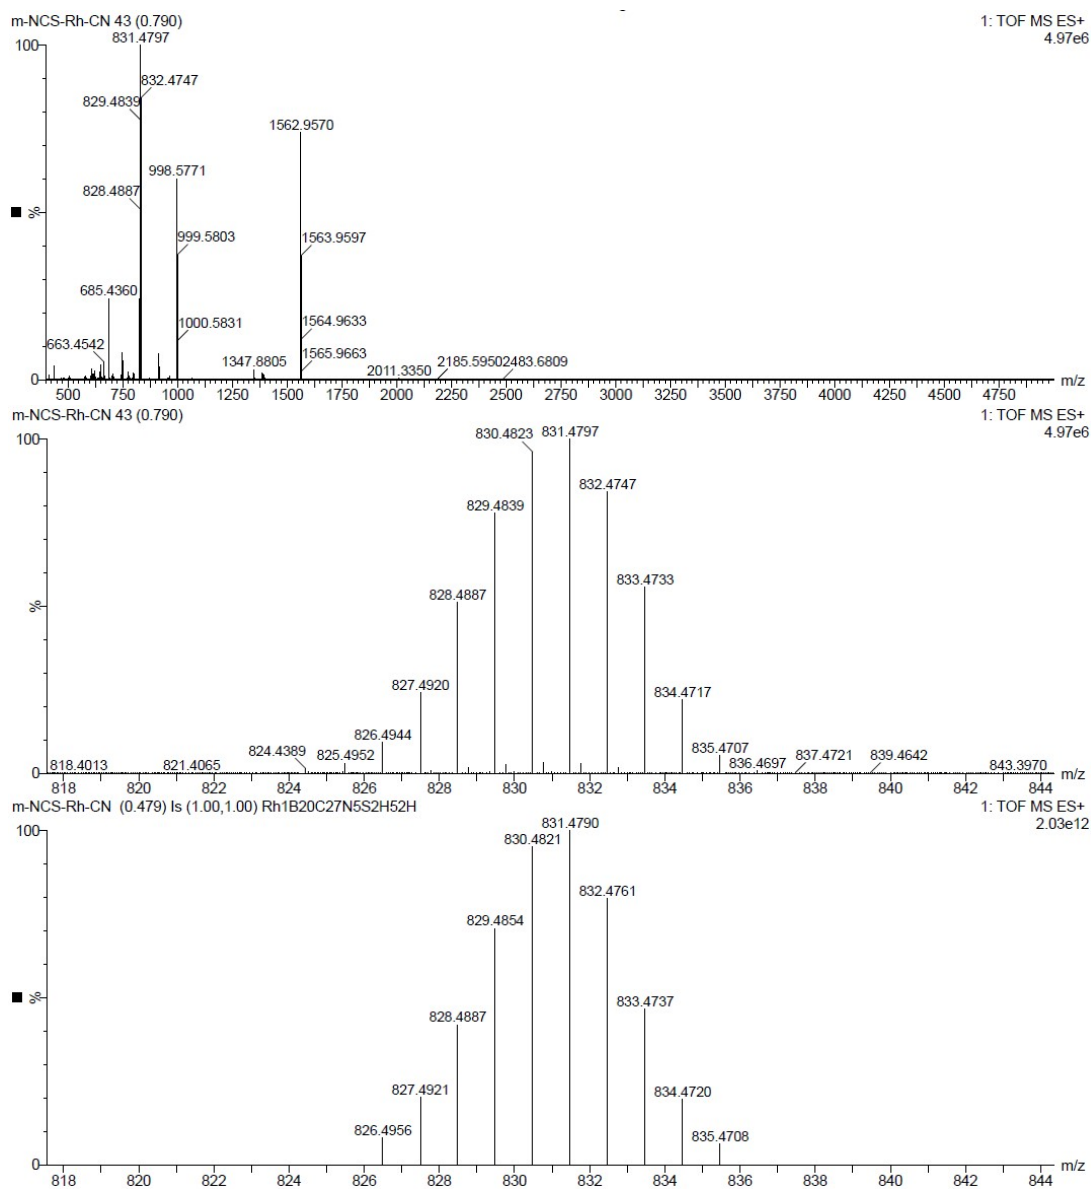

**Figure S65.** Experimental (top) and theoretical (bottom) ESI-MS of complex 6.



### S3. Density functional theory (DFT) calculations<sup>[2-6]</sup>

**Table S1.** NPA charges (*in e*) for Ligands **1-3** and R = CN, OH, H. Level of theory: SMD(CH<sub>2</sub>Cl<sub>2</sub>)-B3LYP-D3/Def2-TZVPP//SMD(CH<sub>2</sub>Cl<sub>2</sub>)-B3LYP-D3/Def2-SVP.

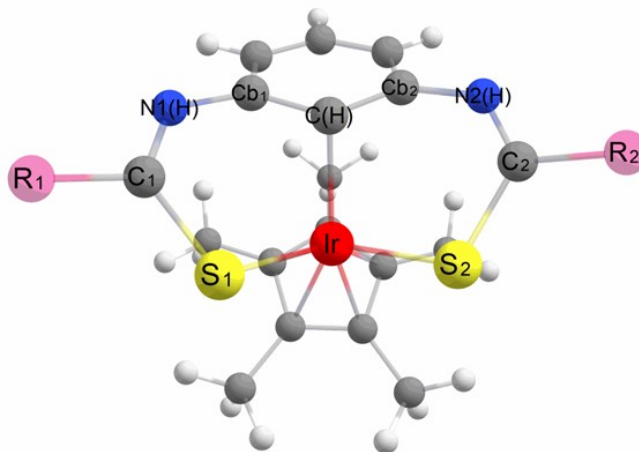

|       | Ligand 1          | Ligand 2          | Ligand 3          | R = -CN <sup>a</sup> | R = -OH <sup>a</sup> | R = -H <sup>a</sup> |
|-------|-------------------|-------------------|-------------------|----------------------|----------------------|---------------------|
| S1    | -0.191            | -0.221            | -0.089            | -0.058               | -0.263               | -0.201              |
| S2    | -0.188            | -0.221            | -0.121            | -0.058               | -0.270               | -0.201              |
| C1    | 0.109             | 0.148             | 0.112             | -0.032               | 0.391                | -0.075              |
| C2    | 0.108             | 0.148             | 0.128             | -0.032               | 0.393                | -0.075              |
| N1(H) | -0.528<br>(0.424) | -0.533<br>(0.420) | -0.515<br>(0.435) | -0.473<br>(0.442)    | -0.568<br>(0.421)    | -0.513<br>(0.428)   |
| N2(H) | -0.515<br>(0.423) | -0.533<br>(0.420) | -0.511<br>(0.440) | -0.473<br>(0.442)    | -0.571<br>(0.422)    | -0.513<br>(0.428)   |
| C(H)  | -0.266<br>(0.273) | -0.266<br>(0.273) | -0.263<br>(0.276) | -0.263<br>(0.271)    | -0.234<br>(0.263)    | -0.277<br>(0.273)   |
| C1b   | 0.146             | 0.142             | 0.144             | 0.137                | 0.140                | 0.137               |
| C2b   | 0.143             | 0.142             | 0.143             | 0.137                | 0.141                | 0.137               |
| R1    | 0.022             | 0.034             | -0.124            | -0.069               | -0.245               | 0.212               |
| R2    | 0.022             | 0.034             | -0.123            | -0.069               | -0.244               | 0.212               |

<sup>a</sup> R = R<sub>1</sub> = R<sub>2</sub> in Figure of Table S1.

**Table S2.** EDDB analysis for the different complexes. Level of theory: SMD(CH<sub>2</sub>Cl<sub>2</sub>)-B3LYP-D3/Def2-SVP.<sup>a</sup>

|                                           | Complex 1                   | Complex 2                   | Complex 3a                  | Complex 5a                  | R = -CN <sup>b</sup>        | R = -OH <sup>b</sup>        | R = -H <sup>b</sup>         |
|-------------------------------------------|-----------------------------|-----------------------------|-----------------------------|-----------------------------|-----------------------------|-----------------------------|-----------------------------|
| Total population of electrons             | 36.6266e<br>(6.1044 e/atom) | 36.6355e<br>(6.1059 e/atom) | 36.6625e<br>(6.1104 e/atom) | 36.5920e<br>(6.0987 e/atom) | 36.6732e<br>(6.1122 e/atom) | 36.7256e<br>(6.1209 e/atom) | 36.7294e<br>(6.1216 e/atom) |
| Total population of delocalized electrons | 4.8254 e<br>(0.8042 e/atom) | 4.8135 e<br>(0.8023 e/atom) | 3.5179 e<br>(0.5863 e/atom) | 4.7757 e<br>(0.7959 e/atom) | 3.477 e<br>(0.5796 e/atom)  | 3.4678 e<br>(0.5780 e/atom) | 3.4568 e<br>(0.5761 e/atom) |

<sup>a</sup> For benzene: 37.3361 e (6.2227 e/atom ) and 5.5746 e (0.9291 e/atom ). <sup>b</sup> R = R<sub>1</sub> = R<sub>2</sub> in Figure of Table S1.

**Table S3.** NICS(1)zz values for the different complexes. Level of theory: SMD(CH<sub>2</sub>Cl<sub>2</sub>)-B3LYP-D3/Def2-SVP.<sup>a</sup>

|                 | Complex 1 | Complex 2 | Complex 3a | Complex 5a | R = -CN <sup>b</sup> | R = -OH <sup>b</sup> | R = -H <sup>b</sup> |
|-----------------|-----------|-----------|------------|------------|----------------------|----------------------|---------------------|
| NICS(1)zz (ppm) | -16.7     | -18.2     | -19.9      | -15.3      | -22.7                | -18.7                | -20.7               |

<sup>a</sup> For benzene: -27.70 ppm. <sup>b</sup> R = R<sub>1</sub> = R<sub>2</sub> in Figure of Table S1.

**Table S4.** Metal···C–H interaction analysis by Mayer bond orders and three-centre electron sharing indices (3c-ESI). Level of theory: SMD(CH<sub>2</sub>Cl<sub>2</sub>)-B3LYP-D3/Def2-SVP ( Insert: The structures of complexes: PhCr(CO)<sub>3</sub>; AuPhCl<sub>3</sub>; H-Bond; Anagostic; Cp\*Ir(C<sub>2</sub>H<sub>4</sub>)<sub>2</sub><sup>+</sup>).

| System                                                                       | Mayer Bond Order |       |       | 3c-ESI  |
|------------------------------------------------------------------------------|------------------|-------|-------|---------|
|                                                                              | M-C              | C-H   | M-H   | M···C-H |
| Complex 3a                                                                   | 0.500            | 0.889 | 0.041 | 0.017   |
| PhCr(CO) <sub>3</sub>                                                        | 0.451            | 0.988 | 0.002 | 0.005   |
| AuPhCl <sub>3</sub> <sup>a</sup>                                             | 0.367            | 0.914 | 0.019 | 0.020   |
| H-Bond <sup>b</sup>                                                          | 0.001            | 0.796 | 0.155 | -0.002  |
| Anagostic <sup>c</sup>                                                       | 0.213            | 0.804 | 0.166 | 0.043   |
| Cp*Ir(C <sub>2</sub> H <sub>4</sub> ) <sub>2</sub> <sup>+</sup> <sup>d</sup> | 0.299            | 0.688 | 0.268 | 0.098   |

<sup>a</sup> Zwitterionic Wheland intermediate<sup>[6]</sup>; <sup>b-d</sup> Complexes possessing H-bond, anagostic and agostic interactions, respectively, obtained from ref. 46 of the main text. CCDC for b and c: ZIYJID and BIXFUJ. 3c-ESI referred to M···H-X (X = C or N) instead of M···C-H.

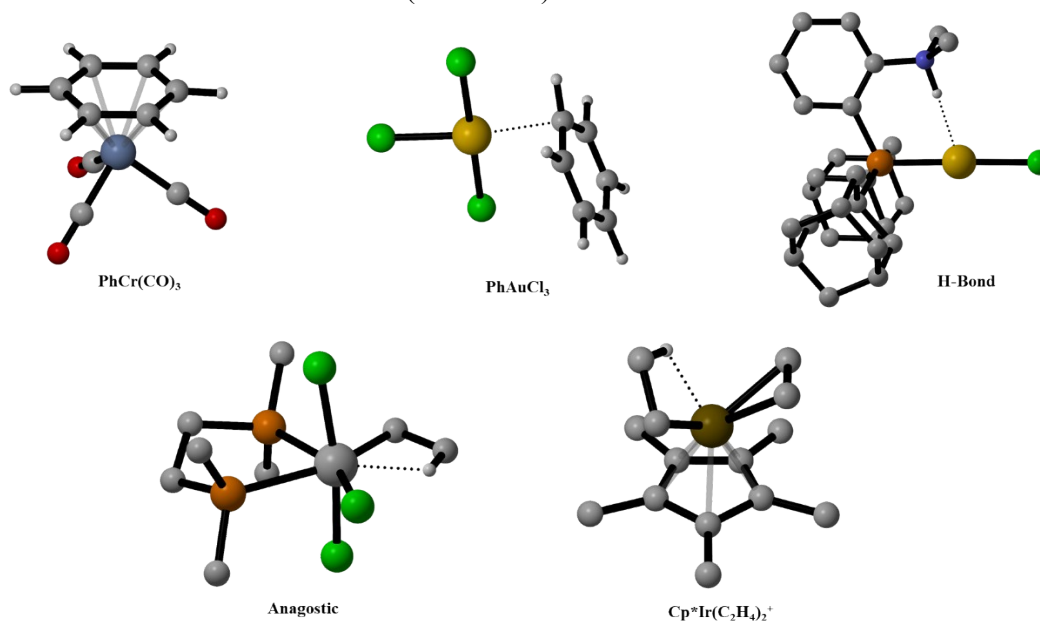

**Table S5.** Gibbs energies (kcal/mol) for reaction (1).<sup>a</sup>

| System     | $\Delta G$ |
|------------|------------|
| Complex 1  | -7.01      |
| Complex 2  | -6.04      |
| Complex 3a | 12.50      |
| R = -CN    | 11.17      |
| R = -OH    | 5.01       |
| R = -H     | -5.07      |

<sup>a</sup> Complex n + NEt<sub>3</sub>H<sup>+</sup> → Complex np + NEt<sub>3</sub> (1). See Figure S66. <sup>b</sup> R = R<sub>1</sub> = R<sub>2</sub> in Figure of Table S1.

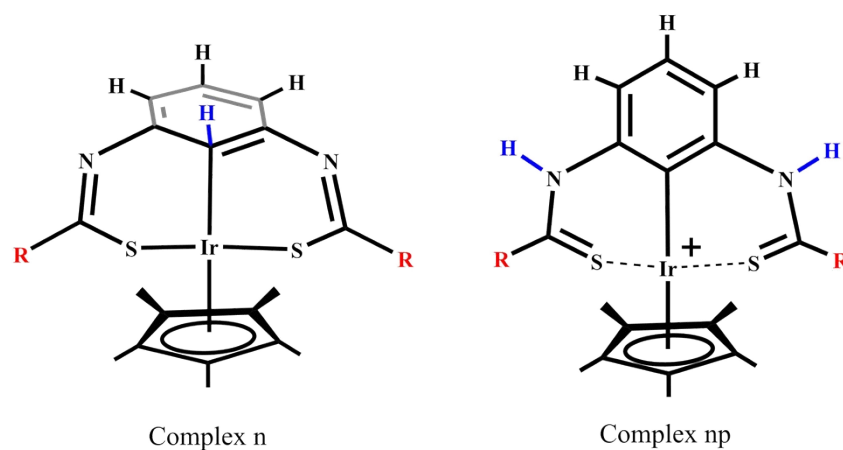

**Figure S66.** Molecular structures of complexes n and np in Equation (1).

**Table S6.** QTAIM analysis<sup>[7]</sup> of the bond critical point (BCP) Ir···C. Level of theory: SMD(CH<sub>2</sub>Cl<sub>2</sub>)-B3LYP-D3/Def2-SVP.

|            | $\rho$ | $\nabla\rho^2$ | $\varepsilon$ | <b>K</b> |
|------------|--------|----------------|---------------|----------|
| Complex 3a | 0.079  | 0.108          | 0.113         | 0.026    |

**Table S7.** QTAIM analysis<sup>[7]</sup> of the bond critical point (BCP) C–H. Level of theory: SMD(CH<sub>2</sub>Cl<sub>2</sub>)-B3LYP-D3/Def2-SVP.

|            | $\rho$ | $\nabla\rho^2$ | $\varepsilon$ | <b>K</b> |
|------------|--------|----------------|---------------|----------|
| Complex 3a | 0.279  | -1.065         | 0.027         | 0.305    |

## S4. Crystallographic Information

**Table S8.** Crystal data and structure refinement for Ligand **3**.

|                                   |                                             |                              |
|-----------------------------------|---------------------------------------------|------------------------------|
| CCDC number                       | 2303640                                     |                              |
| Identification code               | cu_230621b_0m_a                             |                              |
| Empirical formula                 | C12 H28 B20 N2 S2                           |                              |
| Formula weight                    | 480.68                                      |                              |
| Temperature                       | 298(2) K                                    |                              |
| Wavelength                        | 1.54178 Å                                   |                              |
| Crystal system                    | Monoclinic                                  |                              |
| Space group                       | C2/c                                        |                              |
| Unit cell dimensions              | a = 31.1627(9) Å                            | $\alpha = 90^\circ$ .        |
|                                   | b = 12.4318(3) Å                            | $\beta = 107.595(2)^\circ$ . |
|                                   | c = 14.5172(4) Å                            | $\gamma = 90^\circ$ .        |
| Volume                            | 5361.0(3) Å <sup>3</sup>                    |                              |
| Z                                 | 8                                           |                              |
| Density (calculated)              | 1.191 Mg/m <sup>3</sup>                     |                              |
| Absorption coefficient            | 1.823 mm <sup>-1</sup>                      |                              |
| F(000)                            | 1968                                        |                              |
| Crystal size                      | 0.250 x 0.220 x 0.180 mm <sup>3</sup>       |                              |
| Theta range for data collection   | 4.712 to 65.153°.                           |                              |
| Index ranges                      | -35<=h<=36, -13<=k<=14, -15<=l<=17          |                              |
| Reflections collected             | 26231                                       |                              |
| Independent reflections           | 4556 [R(int) = 0.0721]                      |                              |
| Completeness to theta = 65.153°   | 99.4 %                                      |                              |
| Absorption correction             | Semi-empirical from equivalents             |                              |
| Max. and min. transmission        | 0.753 and 0.576                             |                              |
| Refinement method                 | Full-matrix least-squares on F <sup>2</sup> |                              |
| Data / restraints / parameters    | 4556 / 14 / 343                             |                              |
| Goodness-of-fit on F <sup>2</sup> | 1.028                                       |                              |
| Final R indices [I>2sigma(I)]     | R1 = 0.0633, wR2 = 0.1794                   |                              |
| R indices (all data)              | R1 = 0.0797, wR2 = 0.1932                   |                              |
| Extinction coefficient            | n/a                                         |                              |
| Largest diff. peak and hole       | 0.522 and -0.338 e.Å <sup>-3</sup>          |                              |

$$R_1 = \frac{\sum ||F_o| - |F_c||}{\sum |F_o|} \text{ (based on reflections with } F_o^2 > 2\sigma F^2); wR_2 = \frac{[\sum w(F_o^2 - F_c^2)^2 / \sum w(F_o^2)^2]}{1/2}.$$

**Table S9.** Crystal data and structure refinement for Ligand 4.

|                                 |                                             |                       |
|---------------------------------|---------------------------------------------|-----------------------|
| CCDC number                     | 2303643                                     |                       |
| Identification code             | platon_sq                                   |                       |
| Empirical formula               | C17 H43 B30 N3 S3 Cl4                       |                       |
| Formula weight                  | 851.82                                      |                       |
| Temperature                     | 193.0 K                                     |                       |
| Wavelength                      | 1.34139 Å                                   |                       |
| Crystal system                  | Orthorhombic                                |                       |
| Space group                     | P b c a                                     |                       |
| Unit cell dimensions            | a = 10.9098(9) Å                            | $\alpha = 90^\circ$ . |
|                                 | b = 25.502(2) Å                             | $\beta = 90^\circ$ .  |
|                                 | c = 31.388(3) Å                             | $\gamma = 90^\circ$ . |
| Volume                          | 8732.6(12) Å <sup>3</sup>                   |                       |
| Z                               | 8                                           |                       |
| Density (calculated)            | 1.296 Mg/m <sup>3</sup>                     |                       |
| Absorption coefficient          | 2.586 mm <sup>-1</sup>                      |                       |
| F(000)                          | 3456.0                                      |                       |
| Crystal size                    | 0.33 × 0.28 × 0.12 mm <sup>3</sup>          |                       |
| Theta range for data collection | 3.255 to 53.499°.                           |                       |
| Index ranges                    | -13 ≤ h ≤ 12, -30 ≤ k ≤ 30, -37 ≤ l ≤ 37    |                       |
| Reflections collected           | 32746                                       |                       |
| Independent reflections         | 7801 [R(int) = 0.1447]                      |                       |
| Completeness to theta = 53.499° | 99.1 %                                      |                       |
| Absorption correction           | Semi-empirical from equivalents             |                       |
| Max. and min. transmission      | 0.7510 and 0.4735                           |                       |
| Refinement method               | Full-matrix least-squares on F <sup>2</sup> |                       |
| Data / restraints / parameters  | 7801 / 212 / 639                            |                       |
| Goodness-of-fit on F2           | 1.053                                       |                       |
| Final R indices [I > 2σ(I)]     | R1 = 0.1440, wR2 = 0.3770                   |                       |
| R indices (all data)            | R1 = 0.2144, wR2 = 0.4114                   |                       |
| Extinction coefficient          | n/a                                         |                       |
| Largest diff. peak and hole     | 1.386 and -0.570 e.Å <sup>-3</sup>          |                       |

$$R_1 = \frac{\sum ||F_o| - |F_c||}{\sum |F_o|} \text{ (based on reflections with } F_o^2 > 2\sigma F^2); wR_2 = \frac{[\sum w(F_o^2 - F_c^2)^2 / \sum w(F_o^2)^2]}{1/2}.$$

**Table S10.** Crystal data and structure refinement for complex **3a**.

|                                   |                                                                                                                                    |
|-----------------------------------|------------------------------------------------------------------------------------------------------------------------------------|
| CCDC number                       | 2303637                                                                                                                            |
| Identification code               | 230804b_0ma_a                                                                                                                      |
| Empirical formula                 | C17.60 H32.80 B16 Ir0.80 N1.60 S1.60                                                                                               |
| Formula weight                    | 644.87                                                                                                                             |
| Temperature                       | 174(2) K                                                                                                                           |
| Wavelength                        | 1.34139 Å                                                                                                                          |
| Crystal system                    | Monoclinic                                                                                                                         |
| Space group                       | P21/c                                                                                                                              |
| Unit cell dimensions              | a = 19.1073(6) Å $\alpha = 90^\circ$ .<br>b = 13.3046(4) Å $\beta = 99.2970(10)^\circ$ .<br>c = 13.9712(4) Å $\gamma = 90^\circ$ . |
| Volume                            | 3505.03(18) Å <sup>3</sup>                                                                                                         |
| Z                                 | 5                                                                                                                                  |
| Density (calculated)              | 1.528 Mg/m <sup>3</sup>                                                                                                            |
| Absorption coefficient            | 5.715 mm <sup>-1</sup>                                                                                                             |
| F(000)                            | 1584                                                                                                                               |
| Crystal size                      | 0.260 x 0.250 x 0.200 mm <sup>3</sup>                                                                                              |
| Theta range for data collection   | 3.537 to 52.187°.                                                                                                                  |
| Index ranges                      | -22<=h<=22, -15<=k<=9, -15<=l<=16                                                                                                  |
| Reflections collected             | 23569                                                                                                                              |
| Independent reflections           | 5958 [R(int) = 0.0354]                                                                                                             |
| Completeness to theta = 66.004°   | 99.1 %                                                                                                                             |
| Absorption correction             | Semi-empirical from equivalents                                                                                                    |
| Max. and min. transmission        | 0.750 and 0.421                                                                                                                    |
| Refinement method                 | Full-matrix least-squares on F <sup>2</sup>                                                                                        |
| Data / restraints / parameters    | 5958 / 8 / 442                                                                                                                     |
| Goodness-of-fit on F <sup>2</sup> | 1.067                                                                                                                              |
| Final R indices [I>2sigma(I)]     | R1 = 0.0357, wR2 = 0.1137                                                                                                          |
| R indices (all data)              | R1 = 0.0380, wR2 = 0.1171                                                                                                          |
| Extinction coefficient            | 0.00042(8)                                                                                                                         |
| Largest diff. peak and hole       | 1.673 and -1.847 e.Å <sup>-3</sup>                                                                                                 |

$R_1 = \Sigma||F_0| - |F_c|| / \Sigma|F_0|$  (based on reflections with  $F_0^2 > 2\sigma F^2$ );  $wR_2 = [\Sigma w(F_0^2 - F_c^2)^2 / \Sigma w(F_0^2)^2]^{1/2}$ .

**Table S11.** Crystal data and structure refinement for complex **3b**.

|                                   |                                             |                 |
|-----------------------------------|---------------------------------------------|-----------------|
| CCDC number                       | 2303636                                     |                 |
| Identification code               | 230802g_0ma_a                               |                 |
| Empirical formula                 | C22 H41 B20 N2 Rh S2                        |                 |
| Formula weight                    | 716.80                                      |                 |
| Temperature                       | 173(2) K                                    |                 |
| Wavelength                        | 1.34139 Å                                   |                 |
| Crystal system                    | Monoclinic                                  |                 |
| Space group                       | P2 <sub>1</sub> /c                          |                 |
| Unit cell dimensions              | a = 19.052(2) Å                             | α = 90°.        |
|                                   | b = 13.3058(15) Å                           | β = 99.388(8)°. |
|                                   | c = 13.995(2) Å                             | γ = 90°.        |
| Volume                            | 3500.2(8) Å <sup>3</sup>                    |                 |
| Z                                 | 4                                           |                 |
| Density (calculated)              | 1.360 Mg/m <sup>3</sup>                     |                 |
| Absorption coefficient            | 3.494 mm <sup>-1</sup>                      |                 |
| F(000)                            | 1456                                        |                 |
| Crystal size                      | 0.250 x 0.220 x 0.180 mm <sup>3</sup>       |                 |
| Theta range for data collection   | 3.541 to 48.177°.                           |                 |
| Index ranges                      | -21 ≤ h ≤ 17, -13 ≤ k ≤ 14, -15 ≤ l ≤ 15    |                 |
| Reflections collected             | 17259                                       |                 |
| Independent reflections           | 4930 [R(int) = 0.0708]                      |                 |
| Completeness to theta = 48.177°   | 98.1 %                                      |                 |
| Absorption correction             | Semi-empirical from equivalents             |                 |
| Max. and min. transmission        | 0.750 and 0.512                             |                 |
| Refinement method                 | Full-matrix least-squares on F <sup>2</sup> |                 |
| Data / restraints / parameters    | 4930 / 8 / 441                              |                 |
| Goodness-of-fit on F <sup>2</sup> | 1.099                                       |                 |
| Final R indices [I > 2σ(I)]       | R1 = 0.0767, wR2 = 0.1908                   |                 |
| R indices (all data)              | R1 = 0.1225, wR2 = 0.2238                   |                 |
| Extinction coefficient            | n/a                                         |                 |
| Largest diff. peak and hole       | 1.560 and -1.785 e.Å <sup>-3</sup>          |                 |

$$R_1 = \frac{\sum ||F_o| - |F_c||}{\sum |F_o|} \text{ (based on reflections with } F_o^2 > 2\sigma F^2); wR_2 = \frac{[\sum w(F_o^2 - F_c^2)^2 / \sum w(F_o^2)^2]}{1/2}.$$

**Table S12.** Crystal data and structure refinement for complex **4**.

|                                   |                                                                                                                            |
|-----------------------------------|----------------------------------------------------------------------------------------------------------------------------|
| CCDC number                       | 2303641                                                                                                                    |
| Identification code               | 230218d_0m_a                                                                                                               |
| Empirical formula                 | C <sub>90</sub> H <sub>158</sub> B <sub>60</sub> Ir <sub>6</sub> N <sub>6</sub> S <sub>6</sub>                             |
| Formula weight                    | 3318.37                                                                                                                    |
| Temperature                       | 173.0 K                                                                                                                    |
| Wavelength                        | 1.34139 Å                                                                                                                  |
| Crystal system                    | Triclinic                                                                                                                  |
| Space group                       | P-1                                                                                                                        |
| Unit cell dimensions              | a = 17.6388(6) Å      α = 91.778(2)°.<br>b = 18.5304(7) Å      β = 91.812(2)°.<br>c = 24.0367(9) Å      γ = 103.9010(10)°. |
| Volume                            | 7616.5(5) Å <sup>3</sup>                                                                                                   |
| Z                                 | 2                                                                                                                          |
| Density (calculated)              | 1.447 Mg/m <sup>3</sup>                                                                                                    |
| Absorption coefficient            | 7.552 mm <sup>-1</sup>                                                                                                     |
| F(000)                            | 3196                                                                                                                       |
| Crystal size                      | 0.18 x 0.15 x 0.12 mm <sup>3</sup>                                                                                         |
| Theta range for data collection   | 3.736 to 52.299°.                                                                                                          |
| Index ranges                      | -20 ≤ h ≤ 20, -21 ≤ k ≤ 21, -28 ≤ l ≤ 28                                                                                   |
| Reflections collected             | 125456                                                                                                                     |
| Independent reflections           | 26018 [R(int) = 0.0460]                                                                                                    |
| Completeness to theta = 52.299°   | 99.4 %                                                                                                                     |
| Absorption correction             | Semi-empirical from equivalents                                                                                            |
| Max. and min. transmission        | 0.008 and 0.002                                                                                                            |
| Refinement method                 | Full-matrix least-squares on F <sup>2</sup>                                                                                |
| Data / restraints / parameters    | 26018 / 0 / 1549                                                                                                           |
| Goodness-of-fit on F <sup>2</sup> | 1.036                                                                                                                      |
| Final R indices [I > 2σ(I)]       | R1 = 0.0395, wR2 = 0.0973                                                                                                  |
| R indices (all data)              | R1 = 0.0472, wR2 = 0.1016                                                                                                  |
| Extinction coefficient            | n/a                                                                                                                        |
| Largest diff. peak and hole       | 2.618 and -1.691 e.Å <sup>-3</sup>                                                                                         |

$$R_1 = \frac{\sum ||F_o| - |F_c||}{\sum |F_o|} \text{ (based on reflections with } F_o^2 > 2\sigma F^2); wR_2 = \frac{[\sum w(F_o^2 - F_c^2)^2 / \sum w(F_o^2)^2]}{1/2}.$$



**Table S13.** Crystal data and structure refinement for complex **5a**.

|                                   |                                             |                              |
|-----------------------------------|---------------------------------------------|------------------------------|
| CCDC number                       | 2303638                                     |                              |
| Identification code               | 230806d_0m_a                                |                              |
| Empirical formula                 | C23 H42 B20 F3 Ir N2 O3 S3                  |                              |
| Formula weight                    | 956.16                                      |                              |
| Temperature                       | 173(2) K                                    |                              |
| Wavelength                        | 1.34138 Å                                   |                              |
| Crystal system                    | Triclinic                                   |                              |
| Space group                       | P-1                                         |                              |
| Unit cell dimensions              | a = 11.6139(5) Å                            | $\alpha = 98.948(2)^\circ$ . |
|                                   | b = 13.1923(6) Å                            | $\beta = 101.424(2)^\circ$ . |
|                                   | c = 13.5261(6) Å                            | $\gamma = 91.727(2)^\circ$ . |
| Volume                            | 2002.63(15) Å <sup>3</sup>                  |                              |
| Z                                 | 2                                           |                              |
| Density (calculated)              | 1.586Mg/m <sup>3</sup>                      |                              |
| Absorption coefficient            | 5.489 mm <sup>-1</sup>                      |                              |
| F(000)                            | 940                                         |                              |
| Crystal size                      | 0.280 x 0.250 x 0.220 mm <sup>3</sup>       |                              |
| Theta range for data collection   | 3.811 to 52.000°.                           |                              |
| Index ranges                      | -13<=h<=13, -15<=k<=15, -15<=l<=15          |                              |
| Reflections collected             | 25232                                       |                              |
| Independent reflections           | 6539 [R(int) = 0.0448]                      |                              |
| Completeness to theta = 48.514°   | 96.2 %                                      |                              |
| Absorption correction             | Semi-empirical from equivalents             |                              |
| Max. and min. transmission        | 0.750 and 0.439                             |                              |
| Refinement method                 | Full-matrix least-squares on F <sup>2</sup> |                              |
| Data / restraints / parameters    | 6539 / 107 / 584                            |                              |
| Goodness-of-fit on F <sup>2</sup> | 1.100                                       |                              |
| Final R indices [I>2sigma(I)]     | R1 = 0.0384, wR2 = 0.0958                   |                              |
| R indices (all data)              | R1 = 0.0431, wR2 = 0.1000                   |                              |
| Extinction coefficient            | n/a                                         |                              |
| Largest diff. peak and hole       | 1.342 and -2.189 e.Å <sup>-3</sup>          |                              |

$$R_1 = \frac{\sum ||F_o| - |F_c||}{\sum |F_o|} \text{ (based on reflections with } F_o^2 > 2\sigma F^2); wR_2 = [\frac{\sum w(F_o^2 - F_c^2)^2}{\sum w(F_o^2)^2}]^{1/2}.$$

**Table S14.** Crystal data and structure refinement for complex **5b**.

|                                   |                                             |                            |
|-----------------------------------|---------------------------------------------|----------------------------|
| CCDC number                       | 2303644                                     |                            |
| Identification code               | ga_230808f_a                                |                            |
| Empirical formula                 | C23 H42 B20 F3 N2 O3 Rh S3                  |                            |
| Formula weight                    | 866.87                                      |                            |
| Temperature                       | 173.00 K                                    |                            |
| Wavelength                        | 1.34139 Å                                   |                            |
| Crystal system                    | Triclinic                                   |                            |
| Space group                       | P -1                                        |                            |
| Unit cell dimensions              | a = 11.6103(11) Å                           | $\alpha = 99.204(4)^\circ$ |
|                                   | b = 13.1824(13) Å                           | $\beta = 101.430(4)^\circ$ |
|                                   | c = 13.5411(13) Å                           | $\gamma = 91.527(4)^\circ$ |
| Volume                            | 2001.6(3) Å <sup>3</sup>                    |                            |
| Z                                 | 2                                           |                            |
| Density (calculated)              | 1.438 Mg/m <sup>3</sup>                     |                            |
| Absorption coefficient            | 3.495 mm <sup>-1</sup>                      |                            |
| F(000)                            | 876                                         |                            |
| Crystal size                      | 0.25 x 0.22 x 0.18 mm <sup>3</sup>          |                            |
| Theta range for data collection   | 2.960 to 51.998°                            |                            |
| Index ranges                      | -13<=h<=13, -15<=k<=15, -15<=l<=15          |                            |
| Reflections collected             | 13097                                       |                            |
| Independent reflections           | 6632 [R(int) = 0.0284]                      |                            |
| Completeness to theta = 51.998°   | 97.6%                                       |                            |
| Absorption correction             | Semi-empirical from equivalents             |                            |
| Max. and min. transmission        | 0.6146 and 0.4633                           |                            |
| Refinement method                 | Full-matrix least-squares on F <sup>2</sup> |                            |
| Data / restraints / parameters    | 6632 / 135 / 581                            |                            |
| Goodness-of-fit on F <sup>2</sup> | 1.096                                       |                            |
| Final R indices [I>2sigma(I)]     | R1 = 0.0438, wR2 = 0.0906                   |                            |
| R indices (all data)              | R1 = 0.0595, wR2 = 0.1036                   |                            |
| Extinction coefficient            | n/a                                         |                            |
| Largest diff. peak and hole       | 0.717 and -0.805 e.Å <sup>-3</sup>          |                            |

$R_1 = \Sigma||F_o|-|F_c||/\Sigma|F_o|$  (based on reflections with  $F_o^2 > 2\sigma F^2$ );  $wR_2 = [\Sigma w(F_o^2 - F_c^2)^2 / \Sigma w(F_o^2)^2]^{1/2}$ .

**Table S15.** Crystal data and structure refinement for complex **6**.

|                                   |                                                                                  |                  |
|-----------------------------------|----------------------------------------------------------------------------------|------------------|
| CCDC number                       | 2303639                                                                          |                  |
| Identification code               | cu_230824a_a                                                                     |                  |
| Empirical formula                 | C <sub>27</sub> H <sub>52</sub> B <sub>20</sub> N <sub>5</sub> Rh S <sub>2</sub> |                  |
| Formula weight                    | 829.96                                                                           |                  |
| Temperature                       | 173(2) K                                                                         |                  |
| Wavelength                        | 1.54178 Å                                                                        |                  |
| Crystal system                    | Triclinic                                                                        |                  |
| Space group                       | P-1                                                                              |                  |
| Unit cell dimensions              | a = 12.1157(11) Å                                                                | α = 102.935(4)°. |
|                                   | b = 13.1515(12) Å                                                                | β = 95.742(5)°.  |
|                                   | c = 15.8884(14) Å                                                                | γ = 111.659(4)°. |
| Volume                            | 2246.1(4) Å <sup>3</sup>                                                         |                  |
| Z                                 | 2                                                                                |                  |
| Density (calculated)              | 1.227 Mg/m <sup>3</sup>                                                          |                  |
| Absorption coefficient            | 4.131 mm <sup>-1</sup>                                                           |                  |
| F(000)                            | 852                                                                              |                  |
| Crystal size                      | 0.180 x 0.120 x 0.110 mm <sup>3</sup>                                            |                  |
| Theta range for data collection   | 2.913 to 64.999°.                                                                |                  |
| Index ranges                      | -14 ≤ h ≤ 14, -15 ≤ k ≤ 15, -18 ≤ l ≤ 18                                         |                  |
| Reflections collected             | 13869                                                                            |                  |
| Independent reflections           | 7550 [R(int) = 0.0306]                                                           |                  |
| Completeness to theta = 64.999°   | 98.6 %                                                                           |                  |
| Absorption correction             | Semi-empirical from equivalents                                                  |                  |
| Max. and min. transmission        | 0.644 and 0.523                                                                  |                  |
| Refinement method                 | Full-matrix least-squares on F <sup>2</sup>                                      |                  |
| Data / restraints / parameters    | 7550 / 8 / 513                                                                   |                  |
| Goodness-of-fit on F <sup>2</sup> | 1.041                                                                            |                  |
| Final R indices [I > 2σ(I)]       | R <sub>1</sub> = 0.0291, wR <sub>2</sub> = 0.0685                                |                  |
| R indices (all data)              | R <sub>1</sub> = 0.0326, wR <sub>2</sub> = 0.0704                                |                  |
| Extinction coefficient            | n/a                                                                              |                  |
| Largest diff. peak and hole       | 1.505 and -0.269 e.Å <sup>-3</sup>                                               |                  |

R<sub>1</sub> = Σ||F<sub>0</sub>|-|F<sub>c</sub>||/Σ|F<sub>0</sub>| (based on reflections with F<sub>0</sub><sup>2</sup> > 2σF<sup>2</sup>); wR<sub>2</sub> = [Σw(F<sub>0</sub><sup>2</sup>-F<sub>c</sub><sup>2</sup>)<sup>2</sup>/Σw(F<sub>0</sub><sup>2</sup>)<sup>2</sup>]<sup>1/2</sup>.

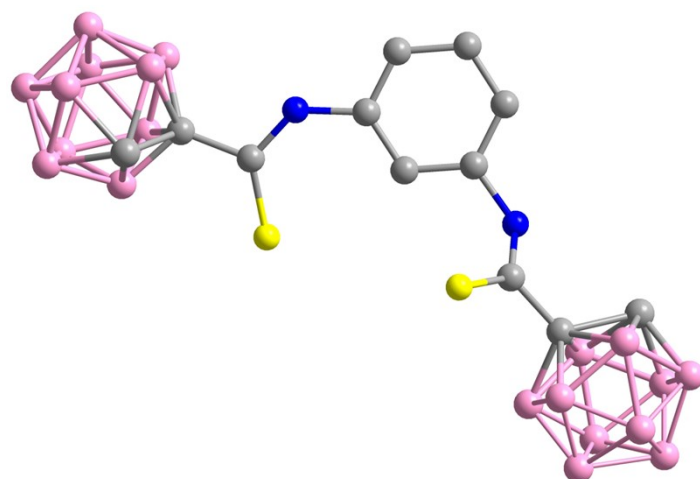

**Figure S67.** Crystallographically-derived molecular structure of Ligand **3** (the H atoms have been omitted for clarity). Color code: S, yellow; N, blue; C, grey; B, light pink.

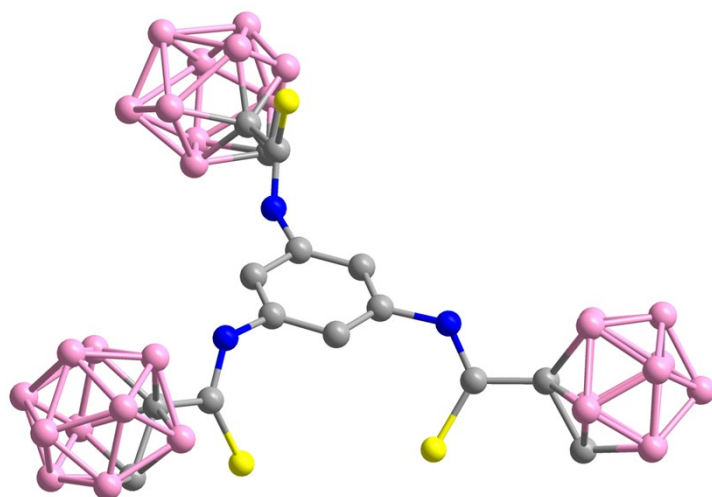

**Figure S68.** Crystallographically-derived molecular structure of Ligand **4** (the H atoms have been omitted for clarity). Color code: S, yellow; N, blue; C, grey; B, light pink.

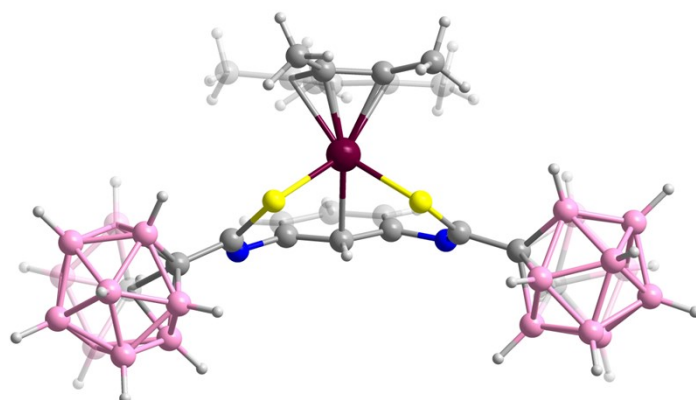

**Figure S69.** Crystallographically-derived molecular structure of complex **3b**. Color code: Rh, dark red; S, yellow; N, blue; C, grey; B, light pink; H, light grey.

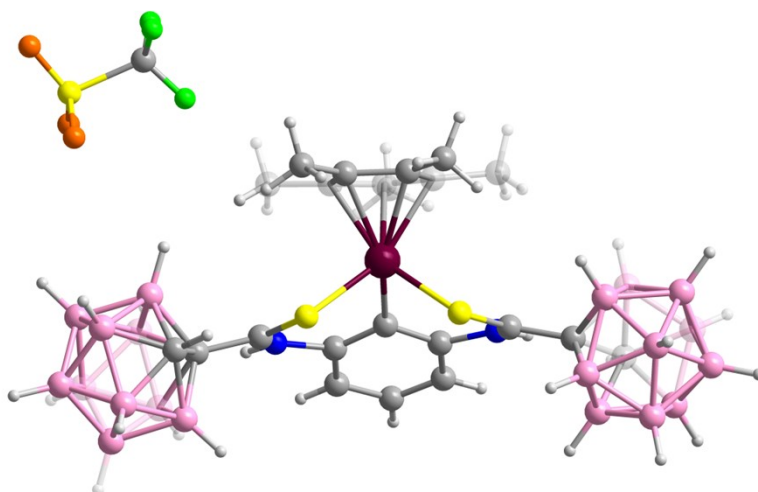

**Figure S70.** Crystallographically-derived molecular structure of complex **5b**. Color code: Rh, dark red; S, yellow; N, blue; C, grey; B, light pink; H, light grey.

## S5. Cartesian coordinates and Gibbs energies of all the computed systems

**Table S16.** Cartesian coordinates (in Å) ZPE corrected electronic and Gibbs energies (in a.u.) of all the stationary points discussed in the text computed at SMD(CH<sub>2</sub>Cl<sub>2</sub>)-B3LYP-D3/Def2-SVP level of theory.

| <b>Complex 3a</b> |           |           |           |
|-------------------|-----------|-----------|-----------|
| Ir                | -0.002066 | -1.161492 | -0.276623 |
| S                 | 1.765088  | 0.223331  | -1.136716 |
| S                 | -1.722765 | 0.282591  | -1.133539 |
| N                 | 2.463218  | 0.554252  | 1.496840  |
| N                 | -2.441819 | 0.565468  | 1.498803  |
| C                 | 4.031105  | 1.368907  | -0.099929 |
| C                 | 4.891169  | 1.917709  | 1.170752  |
| H                 | 4.410599  | 1.750655  | 2.132703  |
| B                 | 5.431597  | 0.494103  | 0.391574  |
| H                 | 5.259599  | -0.551030 | 0.935936  |
| B                 | 5.075582  | 0.794992  | -1.323819 |
| H                 | 4.714181  | -0.124894 | -1.991322 |
| B                 | 4.266479  | 2.372877  | -1.458193 |
| H                 | 3.359329  | 2.521460  | -2.217691 |
| B                 | 4.114994  | 3.068077  | 0.172007  |
| H                 | 3.132191  | 3.601504  | 0.582694  |
| B                 | 6.557386  | 1.749762  | 0.948546  |
| H                 | 7.238814  | 1.506296  | 1.899990  |
| B                 | 6.713596  | 1.058486  | -0.682552 |
| H                 | 7.617873  | 0.325335  | -0.971386 |
| B                 | 5.996089  | 2.224710  | -1.830890 |
| H                 | 6.390900  | 2.330414  | -2.959500 |
| B                 | 5.396679  | 3.630582  | -0.903997 |
| H                 | 5.356668  | 4.742032  | -1.352453 |
| B                 | 5.750786  | 3.328224  | 0.812812  |
| H                 | 5.889484  | 4.146174  | 1.673277  |
| B                 | 6.916542  | 2.817004  | -0.426796 |
| H                 | 7.984714  | 3.354671  | -0.529610 |
| B                 | -4.104276 | 3.091072  | 0.191425  |
| H                 | -3.128978 | 3.629064  | 0.613833  |
| B                 | -4.238896 | 2.410713  | -1.446591 |
| H                 | -3.328197 | 2.574931  | -2.198642 |
| B                 | -5.034878 | 0.824395  | -1.333572 |
| H                 | -4.660550 | -0.085715 | -2.007277 |
| B                 | -5.399172 | 0.503228  | 0.376283  |
| H                 | -5.221330 | -0.545628 | 0.911385  |
| B                 | -5.746608 | 3.329829  | 0.823947  |
| H                 | -5.898431 | 4.137839  | 1.691540  |
| B                 | -5.383979 | 3.652613  | -0.887472 |
| H                 | -5.351236 | 4.768795  | -1.324584 |
| B                 | -5.964682 | 2.250831  | -1.832430 |
| H                 | -6.353032 | 2.364418  | -2.962516 |
| B                 | -6.679117 | 1.066815  | -0.700554 |
| H                 | -7.574783 | 0.328387  | -1.002515 |
| B                 | -6.539709 | 1.742929  | 0.938404  |
| H                 | -7.225152 | 1.483713  | 1.882774  |
| B                 | -6.899523 | 2.820721  | -0.428456 |
| H                 | -7.971803 | 3.349823  | -0.532874 |
| C                 | 2.702159  | 0.712923  | 0.237012  |
| C                 | 1.256902  | 0.145902  | 2.013298  |
| C                 | 0.011892  | 0.451873  | 1.348916  |
| H                 | 0.015552  | 1.328764  | 0.697933  |
| C                 | -1.236055 | 0.150680  | 2.012250  |

|   |           |           |           |
|---|-----------|-----------|-----------|
| C | -1.213782 | -0.508713 | 3.250263  |
| H | -2.160579 | -0.740998 | 3.741267  |
| C | 0.008146  | -0.827575 | 3.849656  |
| H | 0.007088  | -1.335245 | 4.817943  |
| C | 1.231304  | -0.511343 | 3.252328  |
| H | 2.176768  | -0.748646 | 3.743492  |
| C | -2.672593 | 0.744965  | 0.240289  |
| C | -4.003409 | 1.395808  | -0.097107 |
| C | -4.876341 | 1.923573  | 1.173429  |
| H | -4.400652 | 1.750739  | 2.136826  |
| C | -1.171823 | -3.031632 | -0.011789 |
| C | -0.840788 | -2.870912 | -1.412480 |
| C | 0.592574  | -2.873517 | -1.540925 |
| C | 1.161546  | -3.058339 | -0.218276 |
| C | 0.069705  | -3.198726 | 0.703604  |
| C | -2.547738 | -3.151409 | 0.560184  |
| H | -2.890142 | -4.200997 | 0.538262  |
| H | -3.268578 | -2.551369 | -0.012979 |
| H | -2.575380 | -2.808793 | 1.603889  |
| C | -1.824442 | -2.782802 | -2.528782 |
| H | -1.407447 | -2.253336 | -3.396516 |
| H | -2.740720 | -2.264369 | -2.215008 |
| H | -2.103247 | -3.801241 | -2.851048 |
| C | 1.371813  | -2.794529 | -2.809873 |
| H | 1.652559  | -3.810355 | -3.138342 |
| H | 2.298661  | -2.219388 | -2.671446 |
| H | 0.788840  | -2.324318 | -3.613810 |
| C | 2.615636  | -3.201640 | 0.095617  |
| H | 2.832215  | -2.899857 | 1.129870  |
| H | 3.228669  | -2.582968 | -0.574515 |
| H | 2.936727  | -4.251053 | -0.026511 |
| C | 0.191935  | -3.576286 | 2.137048  |
| H | 0.155905  | -4.678400 | 2.207336  |
| H | -0.634440 | -3.179736 | 2.738994  |
| H | 1.141534  | -3.243906 | 2.573836  |

Sum of electronic and zero-point Energies = -2369.178520

Sum of electronic and thermal Free Energies = -2369.249408

#### Complex 1

|    |           |           |           |
|----|-----------|-----------|-----------|
| Ir | -0.001431 | -0.645160 | 0.062750  |
| S  | 1.758249  | -0.106361 | -1.467465 |
| S  | -1.738013 | -0.077481 | -1.483087 |
| N  | 2.481412  | 1.550442  | 0.517898  |
| H  | 3.253288  | 1.989711  | 1.017851  |
| N  | -2.464548 | 1.573564  | 0.504854  |
| H  | -3.235995 | 2.012496  | 1.005875  |
| C  | 2.838317  | 0.814475  | -0.535771 |
| C  | 1.199215  | 2.030874  | 0.898867  |
| C  | 0.006959  | 1.347217  | 0.584715  |
| C  | -1.180421 | 2.042644  | 0.892112  |
| C  | -1.187603 | 3.254988  | 1.602034  |
| H  | -2.141412 | 3.733499  | 1.841116  |
| C  | 0.014996  | 3.843385  | 1.985115  |
| H  | 0.018033  | 4.780446  | 2.545690  |
| C  | 1.213880  | 3.243198  | 1.608703  |
| H  | 2.170848  | 3.712712  | 1.853095  |
| C  | -2.820644 | 0.838265  | -0.548655 |
| C  | 1.159419  | -1.911153 | 1.466033  |
| C  | 0.035866  | -1.358725 | 2.172553  |
| C  | -1.166104 | -1.822217 | 1.528873  |

|   |           |           |           |
|---|-----------|-----------|-----------|
| C | -0.772682 | -2.759594 | 0.476908  |
| C | 0.642178  | -2.814187 | 0.437665  |
| C | 2.602963  | -1.761066 | 1.826906  |
| H | 2.920124  | -2.579110 | 2.497697  |
| H | 2.791526  | -0.810302 | 2.344325  |
| H | 3.244589  | -1.799343 | 0.935083  |
| C | 0.099553  | -0.462929 | 3.366055  |
| H | -0.766753 | 0.211701  | 3.408039  |
| H | 1.012500  | 0.148265  | 3.363507  |
| H | 0.100699  | -1.068038 | 4.289279  |
| C | -2.569118 | -1.570971 | 1.982324  |
| H | -2.886561 | -2.341726 | 2.706919  |
| H | -3.274516 | -1.600821 | 1.139884  |
| H | -2.662088 | -0.591562 | 2.471860  |
| C | -1.735331 | -3.519624 | -0.375977 |
| H | -2.171978 | -4.358175 | 0.193433  |
| H | -1.245934 | -3.930277 | -1.269873 |
| H | -2.565463 | -2.877178 | -0.706908 |
| C | 1.499246  | -3.649458 | -0.457195 |
| H | 2.343464  | -3.066419 | -0.855528 |
| H | 0.928981  | -4.048971 | -1.307399 |
| H | 1.921804  | -4.501732 | 0.102614  |
| C | 4.268104  | 0.848288  | -0.912317 |
| C | 5.014887  | 2.034365  | -0.760493 |
| C | 4.896402  | -0.298243 | -1.434372 |
| C | 6.362586  | 2.066389  | -1.118389 |
| C | 6.245983  | -0.261558 | -1.784218 |
| C | 6.981490  | 0.918716  | -1.627049 |
| H | 4.533130  | 2.945267  | -0.397178 |
| H | 4.321955  | -1.218884 | -1.546919 |
| H | 6.929386  | 2.994371  | -1.010365 |
| H | 6.727753  | -1.160012 | -2.177560 |
| H | 8.038350  | 0.945643  | -1.904678 |
| C | -4.251204 | 0.865307  | -0.921867 |
| C | -4.876230 | -0.288013 | -1.432770 |
| C | -5.002472 | 2.048870  | -0.773838 |
| C | -6.227663 | -0.259891 | -1.776446 |
| C | -6.351816 | 2.072282  | -1.126092 |
| C | -6.967569 | 0.918267  | -1.624339 |
| H | -4.298001 | -1.207111 | -1.539415 |
| H | -4.522703 | 2.963588  | -0.417398 |
| H | -6.707341 | -1.163345 | -2.160777 |
| H | -6.922666 | 2.998182  | -1.021601 |
| H | -8.025785 | 0.938475  | -1.897331 |

Sum of electronic and zero-point Energies = -2170.144530

Sum of electronic and thermal Free Energies = -2170.209033

### Complex 2

|    |           |           |           |
|----|-----------|-----------|-----------|
| Ir | 0.024212  | -0.370517 | 0.021362  |
| S  | 1.861680  | -0.085634 | -1.495030 |
| S  | -1.624039 | -0.251220 | -1.711998 |
| N  | 2.401550  | 1.984615  | 0.122368  |
| H  | 3.126886  | 2.590174  | 0.505909  |
| N  | -2.525750 | 1.819118  | -0.258168 |
| H  | -3.336182 | 2.391147  | -0.023062 |
| C  | 2.841441  | 1.071307  | -0.737860 |
| C  | 1.079580  | 2.462184  | 0.353307  |
| C  | -0.068632 | 1.682090  | 0.105341  |
| C  | -1.291829 | 2.380493  | 0.174800  |
| C  | -1.382435 | 3.704333  | 0.636465  |



|   |           |           |           |
|---|-----------|-----------|-----------|
| H | -2.360373 | 4.189341  | 0.701043  |
| C | -0.228245 | 4.399057  | 0.988686  |
| H | -0.291303 | 5.424593  | 1.358324  |
| C | 1.010301  | 3.787214  | 0.814172  |
| H | 1.933380  | 4.336067  | 1.018440  |
| C | -2.764939 | 0.865827  | -1.153025 |
| C | 1.139087  | -1.201444 | 1.750794  |
| C | -0.066718 | -0.590566 | 2.238259  |
| C | -1.184802 | -1.271720 | 1.641681  |
| C | -0.657392 | -2.388304 | 0.855918  |
| C | 0.757242  | -2.344439 | 0.920775  |
| C | 2.534183  | -0.879690 | 2.181951  |
| H | 2.801432  | -1.460408 | 3.082580  |
| H | 2.648033  | 0.186003  | 2.424561  |
| H | 3.261445  | -1.133365 | 1.398892  |
| C | -0.146889 | 0.548344  | 3.201117  |
| H | -1.044649 | 1.157961  | 3.029455  |
| H | 0.732214  | 1.202989  | 3.126305  |
| H | -0.193910 | 0.161977  | 4.234110  |
| C | -2.629844 | -1.031629 | 1.940604  |
| H | -2.949747 | -1.631818 | 2.810965  |
| H | -3.264005 | -1.316099 | 1.091219  |
| H | -2.822237 | 0.025172  | 2.173841  |
| C | -1.503714 | -3.393785 | 0.144523  |
| H | -1.918792 | -4.121482 | 0.863260  |
| H | -0.926372 | -3.948741 | -0.608305 |
| H | -2.352120 | -2.911541 | -0.363766 |
| C | 1.728806  | -3.292046 | 0.295985  |
| H | 2.571969  | -2.752981 | -0.161505 |
| H | 1.252220  | -3.904446 | -0.481837 |
| H | 2.145649  | -3.972040 | 1.059072  |
| C | -4.174112 | 0.773490  | -1.677345 |
| H | -4.624571 | 1.780240  | -1.681767 |
| H | -4.128573 | 0.423800  | -2.719885 |
| C | -5.055446 | -0.187311 | -0.859127 |
| H | -5.079515 | 0.145286  | 0.192519  |
| H | -4.591359 | -1.187574 | -0.862397 |
| C | -6.480957 | -0.275285 | -1.406068 |
| H | -6.443283 | -0.604030 | -2.459911 |
| H | -6.929661 | 0.734189  | -1.416290 |
| C | 4.312073  | 1.124773  | -1.071328 |
| H | 4.388776  | 1.500961  | -2.107764 |
| H | 4.791272  | 1.882927  | -0.430228 |
| C | 5.060527  | -0.208523 | -0.960951 |
| H | 4.600503  | -0.941905 | -1.642550 |
| H | 4.936831  | -0.610225 | 0.059329  |
| C | 6.549016  | -0.068311 | -1.282673 |
| H | 7.002142  | 0.674462  | -0.601487 |
| H | 6.662090  | 0.343744  | -2.301609 |
| C | 7.302361  | -1.392944 | -1.174233 |
| H | 7.229032  | -1.811940 | -0.155892 |
| H | 6.891889  | -2.143763 | -1.870869 |
| H | 8.372415  | -1.269205 | -1.408238 |
| C | -7.363453 | -1.225123 | -0.598246 |
| H | -6.952236 | -2.249068 | -0.597622 |
| H | -7.443450 | -0.899737 | 0.453173  |
| H | -8.384337 | -1.275298 | -1.010982 |

Sum of electronic and zero-point Energies = -2022.565060

Sum of electronic and thermal Free Energies = -2022.632424

**Complex 5a**

|    |           |           |           |
|----|-----------|-----------|-----------|
| Ir | 0.010241  | 0.857628  | 0.052441  |
| S  | -1.738869 | -0.088001 | -1.279820 |
| S  | 1.777112  | -0.108765 | -1.251408 |
| N  | -2.488110 | -1.106531 | 1.082804  |
| H  | -3.252447 | -1.354122 | 1.707892  |
| N  | 2.457133  | -1.198304 | 1.107036  |
| H  | 3.215745  | -1.561205 | 1.685187  |
| C  | -4.269325 | -0.833575 | -0.535619 |
| C  | -5.195774 | -1.953327 | 0.219277  |
| H  | -4.708899 | -2.571713 | 0.971169  |
| B  | -5.437544 | -0.300516 | 0.623489  |
| H  | -5.026142 | 0.092640  | 1.669369  |
| B  | -5.203056 | 0.543722  | -0.929353 |
| H  | -4.655921 | 1.601875  | -0.919825 |
| B  | -4.771282 | -0.662176 | -2.164495 |
| H  | -3.952341 | -0.406281 | -2.988675 |
| B  | -4.719460 | -2.269041 | -1.396276 |
| H  | -3.863632 | -3.075637 | -1.581192 |
| B  | -6.790317 | -1.434106 | 0.436382  |
| H  | -7.364092 | -1.774897 | 1.426822  |
| B  | -6.837935 | 0.171315  | -0.333679 |
| H  | -7.562613 | 1.037150  | 0.066777  |
| B  | -6.433057 | -0.053436 | -2.059773 |
| H  | -6.869827 | 0.665590  | -2.914011 |
| B  | -6.127789 | -1.791063 | -2.348105 |
| H  | -6.342961 | -2.328636 | -3.396699 |
| B  | -6.356511 | -2.636628 | -0.801488 |
| H  | -6.638055 | -3.785823 | -0.639480 |
| B  | -7.416720 | -1.273236 | -1.218517 |
| H  | -8.578719 | -1.449423 | -1.455230 |
| B  | 5.131204  | 0.510954  | -0.882804 |
| H  | 4.502675  | 1.514468  | -0.972672 |
| B  | 5.480043  | -0.322496 | 0.652897  |
| H  | 5.107841  | 0.188252  | 1.665526  |
| B  | 5.245260  | -2.072685 | 0.408881  |
| H  | 4.732065  | -2.728002 | 1.265517  |
| B  | 4.733422  | -2.353839 | -1.271910 |
| H  | 3.851350  | -3.086984 | -1.590466 |
| B  | 6.291360  | -0.064124 | -2.092592 |
| H  | 6.503446  | 0.641606  | -3.032054 |
| B  | 6.801824  | 0.208526  | -0.409405 |
| H  | 7.505384  | 1.129713  | -0.106746 |
| B  | 6.877487  | -1.388502 | 0.391910  |
| H  | 7.642478  | -1.617829 | 1.286211  |
| B  | 6.411293  | -2.640651 | -0.799093 |
| H  | 6.834367  | -3.760942 | -0.772148 |
| B  | 6.048903  | -1.810476 | -2.331458 |
| H  | 6.098186  | -2.272685 | -3.431276 |
| B  | 7.381490  | -1.227290 | -1.307257 |
| H  | 8.522199  | -1.336407 | -1.659609 |
| C  | -2.814401 | -0.712776 | -0.143225 |
| C  | -1.210511 | -1.455915 | 1.607544  |
| C  | -0.010958 | -0.908364 | 1.115405  |
| C  | 1.164544  | -1.498852 | 1.618621  |
| C  | 1.154612  | -2.452356 | 2.650888  |
| H  | 2.099091  | -2.857549 | 3.025747  |
| C  | -0.057128 | -2.887812 | 3.180944  |
| H  | -0.074160 | -3.621006 | 3.989573  |
| C  | -1.246870 | -2.408684 | 2.638678  |
| H  | -2.210680 | -2.775931 | 3.002621  |

|   |           |           |           |
|---|-----------|-----------|-----------|
| C | 2.811889  | -0.774300 | -0.097357 |
| C | 4.282037  | -0.923517 | -0.410721 |
| C | 4.761444  | -0.776039 | -1.954476 |
| H | 3.974178  | -0.568413 | -2.677858 |
| C | -1.153495 | 2.451463  | 1.053804  |
| C | -0.018030 | 2.132878  | 1.877609  |
| C | 1.171436  | 2.410325  | 1.118371  |
| C | 0.760343  | 3.006084  | -0.154738 |
| C | -0.655070 | 3.033427  | -0.193843 |
| C | -2.587947 | 2.402114  | 1.469805  |
| H | -2.876876 | 3.352965  | 1.950772  |
| H | -2.770049 | 1.593510  | 2.190465  |
| H | -3.250684 | 2.254973  | 0.607699  |
| C | -0.065885 | 1.610289  | 3.275385  |
| H | 0.767210  | 0.923777  | 3.480183  |
| H | -1.007138 | 1.080118  | 3.474368  |
| H | 0.005662  | 2.450079  | 3.987939  |
| C | 2.578418  | 2.304788  | 1.610644  |
| H | 2.888647  | 3.250529  | 2.088491  |
| H | 3.275973  | 2.108309  | 0.786918  |
| H | 2.685691  | 1.503242  | 2.354089  |
| C | 1.708041  | 3.501012  | -1.197594 |
| H | 2.127433  | 4.476527  | -0.897138 |
| H | 1.208871  | 3.626193  | -2.168103 |
| H | 2.551538  | 2.807205  | -1.331446 |
| C | -1.528597 | 3.573386  | -1.279058 |
| H | -2.372552 | 2.898235  | -1.487227 |
| H | -0.968879 | 3.722755  | -2.212722 |
| H | -1.952686 | 4.545729  | -0.974793 |

Sum of electronic and zero-point Energies = -2369.611286

Sum of electronic and thermal Free Energies = -2369.677655

#### Ligand 1

|   |           |           |           |
|---|-----------|-----------|-----------|
| S | 2.085435  | -1.436835 | -1.133546 |
| S | -1.889418 | -1.723870 | 0.283410  |
| N | 2.479419  | 1.008967  | -0.072316 |
| H | 3.191724  | 1.676838  | 0.214524  |
| N | -2.469271 | 0.880242  | -0.182002 |
| H | -3.234288 | 1.529606  | -0.350741 |
| C | 2.946514  | -0.230981 | -0.367511 |
| C | 1.205049  | 1.592224  | -0.227982 |
| C | 0.016478  | 0.850130  | -0.145771 |
| C | -1.214301 | 1.512246  | -0.265599 |
| C | -1.249515 | 2.905574  | -0.476755 |
| H | -2.212705 | 3.412793  | -0.579540 |
| C | -0.062369 | 3.628720  | -0.545980 |
| H | -0.094626 | 4.709521  | -0.703657 |
| C | 1.168065  | 2.982918  | -0.419736 |
| H | 2.101887  | 3.548347  | -0.476190 |
| C | -2.870545 | -0.389720 | 0.069399  |
| H | 0.040092  | -0.222689 | 0.007157  |
| C | 4.363338  | -0.441085 | 0.061098  |
| C | 5.222549  | -1.253739 | -0.699851 |
| C | 4.856175  | 0.151468  | 1.239224  |
| C | 6.544486  | -1.453050 | -0.303376 |
| C | 6.177318  | -0.061470 | 1.642127  |
| C | 7.026834  | -0.858935 | 0.869740  |
| H | 4.834666  | -1.722463 | -1.606076 |
| H | 4.196160  | 0.755730  | 1.866512  |
| H | 7.203849  | -2.076738 | -0.912777 |

|   |           |           |           |
|---|-----------|-----------|-----------|
| H | 6.539811  | 0.391944  | 2.568429  |
| H | 8.061457  | -1.022581 | 1.182833  |
| C | -4.358576 | -0.519932 | 0.169371  |
| C | -5.002484 | -1.672753 | -0.314150 |
| C | -5.134990 | 0.490440  | 0.768216  |
| C | -6.387675 | -1.803233 | -0.218192 |
| C | -6.521202 | 0.350270  | 0.877048  |
| C | -7.152323 | -0.793439 | 0.379285  |
| H | -4.399097 | -2.461141 | -0.767661 |
| H | -4.653815 | 1.378817  | 1.185638  |
| H | -6.874821 | -2.699306 | -0.611680 |
| H | -7.107415 | 1.135782  | 1.361101  |
| H | -8.237144 | -0.901557 | 0.460907  |

Sum of electronic and zero-point Energies = -1676.691617

Sum of electronic and thermal Free Energies = -1676.743914

### Ligand 2

|   |           |           |           |
|---|-----------|-----------|-----------|
| S | 1.676150  | -1.349303 | -1.443096 |
| S | -1.676149 | -1.349539 | 1.442723  |
| N | 2.410805  | 1.097382  | -0.553740 |
| H | 3.206229  | 1.721787  | -0.434566 |
| N | -2.410711 | 1.097363  | 0.553851  |
| H | -3.206110 | 1.721827  | 0.434818  |
| C | 2.733469  | -0.132411 | -1.017650 |
| C | 1.177704  | 1.724823  | -0.279927 |
| C | 0.000053  | 1.016041  | 0.000035  |
| C | -1.177613 | 1.724793  | 0.280004  |
| C | -1.180261 | 3.131164  | 0.267489  |
| H | -2.105680 | 3.674674  | 0.476741  |
| C | 0.000028  | 3.822860  | 0.000036  |
| H | 0.000012  | 4.915681  | 0.000032  |
| C | 1.180334  | 3.131190  | -0.267418 |
| H | 2.105748  | 3.674706  | -0.476669 |
| C | -2.733412 | -0.132488 | 1.017573  |
| H | 0.000064  | -0.067558 | 0.000030  |
| C | 4.231027  | -0.357817 | -1.084748 |
| H | 4.438003  | -1.047098 | -1.915125 |
| H | 4.748226  | 0.594379  | -1.299793 |
| C | 4.774509  | -0.953900 | 0.225253  |
| H | 4.235447  | -1.894010 | 0.432242  |
| H | 4.541287  | -0.270034 | 1.060900  |
| C | 6.280432  | -1.217379 | 0.178969  |
| H | 6.809525  | -0.272904 | -0.043412 |
| H | 6.502016  | -1.896408 | -0.664013 |
| C | -4.230979 | -0.357803 | 1.084774  |
| H | -4.437945 | -1.047032 | 1.915198  |
| H | -4.748104 | 0.594434  | 1.299818  |
| C | -4.774583 | -0.953906 | -0.225167 |
| H | -4.235644 | -1.894096 | -0.432107 |
| H | -4.541294 | -0.270122 | -1.060863 |
| C | -6.280538 | -1.217179 | -0.178834 |
| H | -6.809505 | -0.272604 | 0.043424  |
| H | -6.502213 | -1.896071 | 0.664235  |
| C | 6.818546  | -1.815432 | 1.478051  |
| H | 6.639655  | -1.141008 | 2.333145  |
| H | 6.327721  | -2.776619 | 1.707988  |
| H | 7.904053  | -1.999828 | 1.419520  |
| C | -6.818735 | -1.815327 | -1.477840 |
| H | -6.639735 | -1.141043 | -2.333022 |
| H | -6.328052 | -2.776617 | -1.707645 |

H -7.904270 -1.999550 -1.419293

Sum of electronic and zero-point Energies = -1529.114516

Sum of electronic and thermal Free Energies = -1529.171448

**Ligand 3**

|   |           |           |           |
|---|-----------|-----------|-----------|
| S | -1.956663 | -1.533402 | 0.408179  |
| S | 2.032435  | -1.448198 | -0.682336 |
| N | -2.474849 | 1.063968  | -0.079794 |
| H | -3.218454 | 1.736432  | -0.262535 |
| N | 2.488542  | 1.115508  | 0.035003  |
| H | 3.218586  | 1.794470  | 0.245123  |
| C | -4.420856 | -0.343413 | -0.004709 |
| C | -5.376284 | 0.312039  | 1.166413  |
| H | -4.847495 | 0.841457  | 1.958764  |
| B | -5.375014 | 1.061446  | -0.363565 |
| H | -4.852319 | 2.124591  | -0.485690 |
| B | -5.225924 | -0.281332 | -1.513597 |
| H | -4.554328 | -0.122493 | -2.488527 |
| B | -5.113612 | -1.794549 | -0.581450 |
| H | -4.381967 | -2.660832 | -0.945097 |
| B | -5.165657 | -1.388503 | 1.148945  |
| H | -4.477109 | -1.876473 | 1.984645  |
| B | -6.865242 | 0.865671  | 0.563615  |
| H | -7.345231 | 1.844064  | 1.053373  |
| B | -6.812697 | 0.459784  | -1.171103 |
| H | -7.364463 | 1.142556  | -1.987248 |
| B | -6.660949 | -1.312883 | -1.302996 |
| H | -7.114300 | -1.923531 | -2.230960 |
| B | -6.615677 | -1.995307 | 0.346785  |
| H | -7.033466 | -3.085181 | 0.619516  |
| B | -6.739214 | -0.640973 | 1.492340  |
| H | -7.139900 | -0.691135 | 2.616851  |
| B | -7.672642 | -0.602995 | -0.021177 |
| H | -8.869143 | -0.689637 | -0.009861 |
| B | 5.365724  | -0.379684 | -1.499687 |
| H | 4.762085  | -0.422893 | -2.524677 |
| B | 5.484782  | 1.063866  | -0.467567 |
| H | 4.992573  | 2.079075  | -0.861124 |
| B | 5.259327  | 0.572216  | 1.225797  |
| H | 4.609516  | 1.254619  | 1.959744  |
| B | 4.998739  | -1.186755 | 1.273504  |
| H | 4.172276  | -1.723679 | 1.940640  |
| B | 6.686509  | -1.474969 | -1.049192 |
| H | 7.044572  | -2.276401 | -1.859508 |
| B | 6.951428  | 0.283966  | -1.091067 |
| H | 7.615781  | 0.802190  | -1.943551 |
| B | 6.890463  | 0.874571  | 0.596360  |
| H | 7.516783  | 1.832133  | 0.957179  |
| B | 6.585557  | -0.520737 | 1.672273  |
| H | 6.988315  | -0.580248 | 2.799604  |
| B | 6.462179  | -1.968230 | 0.644482  |
| H | 6.670023  | -3.099548 | 0.966991  |
| B | 7.637993  | -0.699184 | 0.236536  |
| H | 8.817307  | -0.895749 | 0.335237  |
| C | -2.893535 | -0.202069 | 0.103686  |
| C | -1.206672 | 1.678269  | -0.046052 |
| C | 0.010113  | 0.980354  | -0.025596 |
| C | 1.208654  | 1.708752  | -0.003053 |
| C | 1.193651  | 3.114382  | 0.008700  |
| H | 2.135439  | 3.668230  | 0.032690  |

|   |           |           |           |
|---|-----------|-----------|-----------|
| C | -0.023145 | 3.792218  | -0.019496 |
| H | -0.036270 | 4.884488  | -0.017343 |
| C | -1.222369 | 3.085455  | -0.050892 |
| H | -2.176153 | 3.618572  | -0.072807 |
| C | 2.926330  | -0.129450 | -0.220849 |
| C | 4.441999  | -0.226922 | -0.048811 |
| C | 5.146329  | -1.648402 | -0.369707 |
| H | 4.453613  | -2.427648 | -0.687370 |
| H | 0.019856  | -0.102545 | -0.027990 |

Sum of electronic and zero-point Energies = -1876.173868

Sum of electronic and thermal Free Energies = -1876.231069

### NEt<sub>3</sub>H

|   |           |           |           |
|---|-----------|-----------|-----------|
| N | 0.000920  | -0.000241 | -0.916755 |
| C | 1.424641  | -0.401480 | -0.577618 |
| H | 1.478187  | -1.483593 | -0.761514 |
| H | 2.046691  | 0.097680  | -1.334018 |
| C | 1.921509  | -0.047174 | 0.812280  |
| H | 1.324935  | -0.498781 | 1.614882  |
| H | 1.968895  | 1.039750  | 0.970395  |
| H | 2.948659  | -0.435098 | 0.899033  |
| C | -0.363612 | 1.433013  | -0.577973 |
| H | 0.547688  | 2.019376  | -0.760898 |
| H | -1.106399 | 1.722513  | -1.334466 |
| C | -0.920735 | 1.685329  | 0.811075  |
| H | -0.232378 | 1.394122  | 1.614476  |
| H | -1.886504 | 1.182912  | 0.966941  |
| H | -1.098420 | 2.768777  | 0.897964  |
| C | -1.059541 | -1.031401 | -0.578619 |
| H | -2.022017 | -0.534690 | -0.762662 |
| H | -0.939957 | -1.819679 | -1.334888 |
| C | -1.002698 | -1.638409 | 0.811219  |
| H | -1.089863 | -0.894101 | 1.613051  |
| H | -0.088148 | -2.227922 | 0.967832  |
| H | -1.855992 | -2.328989 | 0.900309  |
| H | 0.000802  | 0.000133  | -1.941341 |

Sum of electronic and zero-point Energies = -292.493122

Sum of electronic and thermal Free Energies = -292.525398

### NEt<sub>3</sub>

|   |           |           |           |
|---|-----------|-----------|-----------|
| N | -0.000754 | 0.000269  | -0.789819 |
| C | 0.511369  | -1.344230 | -0.632257 |
| H | -0.285622 | -2.040695 | -0.947593 |
| H | 1.345830  | -1.493495 | -1.346337 |
| C | 1.012145  | -1.758907 | 0.761541  |
| H | 0.231924  | -1.645454 | 1.530079  |
| H | 1.881108  | -1.155360 | 1.069964  |
| H | 1.332137  | -2.815588 | 0.752803  |
| C | 0.908391  | 1.115547  | -0.632294 |
| H | 1.909298  | 0.773070  | -0.949244 |
| H | 0.620349  | 1.914014  | -1.345068 |
| C | 1.019633  | 1.754045  | 0.762346  |
| H | 1.312090  | 1.019656  | 1.528791  |
| H | 0.063335  | 2.205001  | 1.073177  |
| H | 1.775364  | 2.558930  | 0.754265  |
| C | -1.421008 | 0.229635  | -0.631329 |
| H | -1.624939 | 1.268337  | -0.946210 |
| H | -1.968616 | -0.417514 | -1.345457 |

|   |           |           |          |
|---|-----------|-----------|----------|
| C | -2.030184 | 0.003778  | 0.762568 |
| H | -1.540783 | 0.622223  | 1.530898 |
| H | -1.943311 | -1.050621 | 1.070910 |
| H | -3.104961 | 0.256407  | 0.754312 |

Sum of electronic and zero-point Energies = -292.043595  
Sum of electronic and thermal Free Energies = -292.077466

BIXFUJ

|    |           |           |           |
|----|-----------|-----------|-----------|
| Ti | -0.212640 | 0.909961  | -0.011806 |
| Cl | -2.560305 | 1.392333  | -0.198974 |
| Cl | 0.039792  | 0.717961  | -2.321276 |
| Cl | -0.230527 | 0.764264  | 2.306453  |
| P  | 1.855682  | -0.618622 | 0.013615  |
| P  | -1.182923 | -1.481504 | 0.025409  |
| C  | 1.436393  | 2.249453  | 0.089245  |
| C  | 0.400107  | 3.351283  | 0.141934  |
| C  | 1.398148  | -2.357277 | -0.439948 |
| C  | 0.117913  | -2.770908 | 0.287600  |
| H  | 2.061446  | 2.179137  | 0.986331  |
| H  | 2.043008  | 2.264685  | -0.821702 |
| H  | 0.487524  | 4.067562  | -0.690050 |
| H  | 0.383575  | 3.886867  | 1.102844  |
| H  | -0.661189 | 2.983011  | 0.035905  |
| H  | 1.249018  | -2.368078 | -1.531936 |
| H  | 2.237483  | -3.034364 | -0.212267 |
| H  | 0.290652  | -2.836260 | 1.374269  |
| H  | -0.247095 | -3.754753 | -0.048973 |
| C  | 3.231476  | -0.238341 | -1.131724 |
| H  | 3.942431  | -1.078857 | -1.163743 |
| H  | 2.822272  | -0.057717 | -2.135760 |
| H  | 3.759201  | 0.664202  | -0.791108 |
| C  | 2.687892  | -0.801804 | 1.635614  |
| H  | 1.972956  | -1.185077 | 2.376239  |
| H  | 3.545920  | -1.487373 | 1.551052  |
| H  | 3.039435  | 0.182673  | 1.977761  |
| C  | -2.435360 | -1.815127 | 1.313145  |
| H  | -3.289033 | -1.142117 | 1.149064  |
| H  | -2.769476 | -2.863894 | 1.271037  |
| H  | -2.000961 | -1.596841 | 2.298933  |
| C  | -2.004088 | -1.962868 | -1.537963 |
| H  | -1.270620 | -1.948812 | -2.356065 |
| H  | -2.452852 | -2.965007 | -1.450766 |
| H  | -2.784234 | -1.220191 | -1.759554 |

Sum of electronic and zero-point Energies = - 3229.521586  
Sum of electronic and thermal Free Energies = - 3229.571213

PhCr(CO)<sub>3</sub>

|   |          |           |           |
|---|----------|-----------|-----------|
| C | 1.618282 | 0.442437  | 1.338851  |
| C | 1.632622 | -0.941897 | 1.061040  |
| C | 1.631103 | 1.390671  | 0.285460  |
| H | 1.602248 | -1.666819 | 1.875141  |
| H | 1.600034 | 2.457936  | 0.506745  |
| C | 1.619788 | -1.380075 | -0.286819 |
| C | 1.618473 | 0.939004  | -1.052271 |
| H | 1.578673 | -2.448337 | -0.506999 |
| H | 1.576377 | 1.663530  | -1.867695 |
| C | 1.632286 | -0.447389 | -1.346782 |
| H | 1.602719 | -0.789775 | -2.381701 |
| H | 1.575483 | 0.786126  | 2.373992  |

|    |           |           |           |
|----|-----------|-----------|-----------|
| Cr | -0.117480 | -0.000242 | -0.000417 |
| C  | -1.177882 | 0.605869  | 1.362046  |
| O  | -1.833456 | 0.993690  | 2.236105  |
| C  | -1.178196 | -1.483172 | -0.156244 |
| O  | -1.833850 | -2.434053 | -0.256526 |
| C  | -1.178859 | 0.876342  | -1.205817 |
| O  | -1.835408 | 1.439413  | -1.977858 |

Sum of electronic and zero-point Energies = -1616.184076

Sum of electronic and thermal Free Energies = -1616.223470

|                                                                 |           |           |           |
|-----------------------------------------------------------------|-----------|-----------|-----------|
| Cp*Ir(C <sub>2</sub> H <sub>4</sub> ) <sub>2</sub> <sup>+</sup> |           |           |           |
| Ir                                                              | 0.517506  | -0.061658 | -0.170937 |
| C                                                               | -1.126512 | 1.366224  | 0.413360  |
| C                                                               | -1.695527 | 0.656773  | -0.720645 |
| C                                                               | -1.736511 | -0.724443 | -0.415177 |
| C                                                               | -1.158107 | -0.900880 | 0.913427  |
| C                                                               | -0.862864 | 0.412112  | 1.458831  |
| C                                                               | 2.066127  | 1.233161  | 0.356338  |
| H                                                               | 1.685407  | 2.168350  | 0.782553  |
| H                                                               | 2.883804  | 0.816585  | 0.952739  |
| C                                                               | 2.277164  | 1.249482  | -1.125360 |
| H                                                               | 2.104846  | 2.222283  | -1.606940 |
| H                                                               | 1.485701  | 0.593382  | -1.700375 |
| H                                                               | 3.214254  | 0.782611  | -1.459918 |
| C                                                               | 1.952528  | -1.643577 | 0.265919  |
| H                                                               | 2.985014  | -1.283045 | 0.245459  |
| H                                                               | 1.668154  | -2.155380 | 1.190023  |
| C                                                               | 1.297726  | -1.944951 | -0.950002 |
| H                                                               | 1.821574  | -1.799305 | -1.900019 |
| H                                                               | 0.488343  | -2.680023 | -0.978220 |
| C                                                               | -0.456643 | 0.713584  | 2.864626  |
| H                                                               | -1.355403 | 0.833102  | 3.494923  |
| H                                                               | 0.147478  | -0.098867 | 3.291676  |
| H                                                               | 0.123015  | 1.644949  | 2.925649  |
| C                                                               | -1.022590 | 2.854261  | 0.519237  |
| H                                                               | -0.644101 | 3.299120  | -0.413286 |
| H                                                               | -2.016845 | 3.292127  | 0.713808  |
| H                                                               | -0.359072 | 3.155087  | 1.341263  |
| C                                                               | -2.157434 | 1.305448  | -1.982535 |
| H                                                               | -1.514108 | 2.153955  | -2.257636 |
| H                                                               | -2.182154 | 0.594774  | -2.820337 |
| H                                                               | -3.178951 | 1.702016  | -1.846128 |
| C                                                               | -2.306967 | -1.816889 | -1.259021 |
| H                                                               | -3.381694 | -1.940099 | -1.036671 |
| H                                                               | -2.211319 | -1.597928 | -2.332244 |
| H                                                               | -1.821189 | -2.781906 | -1.057071 |
| C                                                               | -1.132102 | -2.191182 | 1.666970  |
| H                                                               | -2.145683 | -2.421006 | 2.038163  |
| H                                                               | -0.816493 | -3.027516 | 1.026345  |
| H                                                               | -0.458245 | -2.140315 | 2.532552  |

Sum of electronic and zero-point Energies = -651.582713

Sum of electronic and thermal Free Energies = -651.627844

|                     |          |           |           |
|---------------------|----------|-----------|-----------|
| PhAuCl <sub>3</sub> |          |           |           |
| C                   | 3.467555 | -0.257704 | 0.507900  |
| C                   | 3.225674 | -0.212315 | -0.881698 |
| C                   | 2.689367 | 0.474165  | 1.407891  |
| H                   | 3.857635 | -0.790237 | -1.559335 |
| H                   | 2.897496 | 0.432958  | 2.478760  |



|    |           |           |           |
|----|-----------|-----------|-----------|
| C  | 2.190985  | 0.558203  | -1.376084 |
| C  | 1.652562  | 1.272828  | 0.925140  |
| H  | 1.990398  | 0.613314  | -2.448195 |
| H  | 1.066941  | 1.901762  | 1.599440  |
| C  | 1.366563  | 1.298397  | -0.476540 |
| H  | 0.752220  | 2.108138  | -0.875912 |
| H  | 4.286890  | -0.874993 | 0.885735  |
| Au | -0.523121 | -0.017953 | -0.043438 |
| Cl | 0.633042  | -2.050407 | 0.014478  |
| Cl | -2.533376 | -1.195498 | 0.161849  |
| Cl | -1.692679 | 2.023899  | -0.016830 |

Sum of electronic and zero-point Energies = -1748.097808

Sum of electronic and thermal Free Energies = -1748.138561

#### ZIYJID

|   |           |           |           |
|---|-----------|-----------|-----------|
| C | 0.243511  | -0.161690 | 2.058133  |
| C | -0.255438 | 0.727906  | 3.031853  |
| H | -0.841235 | 1.589698  | 2.721913  |
| C | -0.028264 | 0.542181  | 4.394505  |
| H | -0.438928 | 1.256995  | 5.111123  |
| C | 0.721102  | -0.550343 | 4.833803  |
| H | 0.907571  | -0.709092 | 5.898247  |
| C | 1.238982  | -1.443415 | 3.898284  |
| H | 1.831285  | -2.298793 | 4.228700  |
| C | 1.005542  | -1.247885 | 2.535742  |
| C | 3.095281  | -2.264654 | 1.667412  |
| H | 3.422504  | -2.653934 | 2.638522  |
| H | 3.444751  | -2.918399 | 0.858142  |
| H | 3.464425  | -1.243003 | 1.519601  |
| C | 0.992726  | -3.598013 | 1.750537  |
| H | -0.093621 | -3.499135 | 1.637072  |
| H | 1.401630  | -4.228530 | 0.950844  |
| H | 1.241015  | -4.014872 | 2.733967  |
| C | -1.982052 | 0.500683  | 0.118451  |
| C | -2.688917 | -0.587636 | 0.963911  |
| H | -2.335608 | -1.585472 | 0.651762  |
| H | -2.439181 | -0.468250 | 2.028017  |
| C | -4.214589 | -0.484916 | 0.785806  |
| H | -4.691169 | -1.262881 | 1.404662  |
| C | -2.375492 | 0.287292  | -1.369784 |
| H | -2.039994 | -0.706321 | -1.705563 |
| H | -1.877492 | 1.031192  | -2.007346 |
| C | -4.008847 | 1.986503  | 0.382444  |
| H | -4.335100 | 2.985885  | 0.714297  |
| C | -4.381074 | 1.778988  | -1.093021 |
| H | -5.472745 | 1.864554  | -1.225197 |
| H | -3.913204 | 2.561115  | -1.714863 |
| C | -3.901539 | 0.390326  | -1.541016 |
| H | -4.139655 | 0.235864  | -2.606147 |
| C | -2.477725 | 1.900591  | 0.544544  |
| H | -2.000079 | 2.672949  | -0.075267 |
| H | -2.221416 | 2.110825  | 1.590882  |
| C | -4.581860 | -0.694177 | -0.691464 |
| H | -5.676224 | -0.645954 | -0.819701 |
| H | -4.256584 | -1.694493 | -1.024428 |
| C | -4.682975 | 0.906384  | 1.244903  |
| H | -4.430936 | 1.058373  | 2.308431  |
| H | -5.779451 | 0.983639  | 1.155260  |
| C | 0.988733  | 1.655929  | -0.140781 |
| C | 3.100861  | 2.660072  | -1.956123 |

|    |           |           |           |
|----|-----------|-----------|-----------|
| H  | 3.812650  | 3.434556  | -2.287599 |
| H  | 3.207575  | 1.802151  | -2.641473 |
| C  | 1.854087  | 3.969988  | 0.367917  |
| H  | 1.745538  | 4.825754  | 1.054380  |
| C  | 0.675690  | 2.107498  | -1.585832 |
| H  | -0.351407 | 2.496485  | -1.643230 |
| H  | 0.741258  | 1.243435  | -2.267997 |
| C  | 3.425803  | 2.228605  | -0.516381 |
| H  | 4.450641  | 1.825006  | -0.468902 |
| C  | 0.875545  | 2.864362  | 0.813060  |
| H  | 1.123694  | 2.558983  | 1.839577  |
| H  | -0.149290 | 3.258622  | 0.820190  |
| C  | 1.664717  | 3.205391  | -2.015348 |
| H  | 1.423146  | 3.510352  | -3.046667 |
| C  | 3.293049  | 3.433743  | 0.428370  |
| H  | 3.542566  | 3.135368  | 1.460965  |
| H  | 4.004464  | 4.223879  | 0.135139  |
| C  | 2.444731  | 1.124353  | -0.084917 |
| H  | 2.548419  | 0.252836  | -0.751332 |
| H  | 2.681678  | 0.789421  | 0.938234  |
| C  | 1.525754  | 4.408959  | -1.068466 |
| H  | 2.208131  | 5.217204  | -1.380813 |
| H  | 0.499293  | 4.810927  | -1.116717 |
| Au | 0.416922  | -1.503947 | -1.189834 |
| Cl | 0.980206  | -3.192049 | -2.722798 |
| N  | 1.601567  | -2.237251 | 1.619680  |
| P  | -0.119241 | 0.198736  | 0.276150  |
| H  | 1.354368  | -1.932752 | 0.648459  |

Sum of electronic and zero-point Energies = -2082.353943

Sum of electronic and thermal Free Energies = -2082.412967

## S6. References

1. C. White, A. Yates and P. M. Maitlis, *Inorg. Synth.*, 1992, **29**, 228-234.
2. M. J. Frisch, G. W. Trucks, H. B. Schlegel, G. E. Scuseria, M. A. Robb, J. R. Cheeseman, G. Scalmani, V. Barone, G. A. Petersson, H. Nakatsuji, X. Li, M. Caricato, A. V. Marenich, J. Bloino, B. G. Janesko, R. Gomperts, B. Mennucci, H. P. Hratchian, J. V. Ortiz, A. F. Izmaylov, J. L. Sonnenberg, D. Williams-Young, F. Ding, F. Lipparini, F. Egidi, J. Goings, B. Peng, A. Petrone, T. Henderson, D. Ranasinghe, V. G. Zakrzewski, J. Gao, N. Rega, G. Zheng, W. Liang, M. Hada, M. Ehara, K. Toyota, R. Fukuda, J. Hasegawa, M. Ishida, T. Nakajima, Y. Honda, O. Kitao, H. Nakai, T. Vreven, K. Montgomery, J. A. Montgomery, Jr. J. E. Peralta, F. Ogliaro, M. J. Bearpark, J. J. Heyd, E. N. Brothers, K. N. Kudin, V. N. Staroverov, T. A. Keith, R. Kobayashi, J. Normand, K. Raghavachari, A. P. Rendell, J. C. Burant, S. S. Iyengar, J. Tomasi, M. Cossi, J. M. Millam, M. Klene, C. Adamo, R. Cammi, J. W. Ochterski, R. L. Martin, K. Morokuma, O. Farkas, J. B. Foresman and D. J. Fox, Gaussian 16, Revision C.01, Gaussian, Inc., Wallingford CT, 2019.
3. E. D. Glendening, J. K. Badenhoop, A. E. Reed, J. E. Carpenter, J. A. Bohmann, C. M. Morales, P. Karafiloglou, C. R. Landis and F. Weinhold, NBO 7.0, Theoretical Chemistry Institute, University of Wisconsin, Madison, WI, 2018.
4. E. Matito, ESI-3D: Electron Sharing Indices Program for 3D Molecular Space Partitioning; Institute of Computational chemistry and Catalysis (IQCC), University of Girona, Catalonia, Spain, 2006; <http://iqc.udg.es/eduard/ESI>, 2014.
5. E. Matito, M. Solà, P. Salvador and M. Duran, *Faraday Discuss.*, 2007, **135**, 325-345.
6. (a) L. Rocchigiani, J. Fernandez-Cestau, P. H. M. Budzelaar and M. Bochmann, *Chem. Commun.* 2017, 53, 4358–4361; (b) M. S. Kharasch and H. S. Isbell, *J. Am. Chem. Soc.*, 1931, **53**, 3053–3059; (c) Y. Fuchita, Y. Utsunomiya and M. Yasutake, *J. Chem. Soc., Dalton Trans.*, 2001, 2330–2334.
7. AIMAll (Version 19.10.12), Todd A. Keith, TK Gristmill Software, Overland Park KS, USA, 2019 ([aim.tkgristmill.com](http://aim.tkgristmill.com))
